# Supplementary material for: The Biochemical Pathways of Nicotinamide-Derived Pyridones
Source: PubMed Central journal article supplement (PMC7866226; doi:10.3390/ijms22031145), 2021-01-24

# SUPPLEMENTARY MATERIALS

**Title: The (bio)chemical diagnosis of nicotinamide-derived pyridones**

## **Authors**

F. Hayat,<sup>1,4</sup> M. Sonavane,<sup>1,2,4</sup> M. V. Makarov,<sup>4</sup> S. Trammell,<sup>3</sup> P. McPherson,<sup>4</sup> N. R. Gassman,<sup>2,4</sup> and M. E. Migaud<sup>1,4</sup>

## **Affiliations:**

1. Department of Pharmacology, College of Medicine, University of South Alabama, Mobile, AL, USA.
2. Department of Physiology, College of Medicine, University of South Alabama, Mobile, AL, USA.
3. Novo Nordisk Foundation, Center for Basic Metabolic Research, University of Copenhagen, Denmark.
4. Mitchell Cancer Institute, College of Medicine, University of South Alabama, 1660 Springhill Avenue, Mobile, 36604, AL, USA.

**Table 1.** Isotopic pattern with relative abundance of pyridones and their intermediates.

| Compound name                                                                       | Fragmentation Pattern [Relative Abundance (%)]                        |                                                                                                   |                                                                                             |                  |       |                         |                           |                                   |
|-------------------------------------------------------------------------------------|-----------------------------------------------------------------------|---------------------------------------------------------------------------------------------------|---------------------------------------------------------------------------------------------|------------------|-------|-------------------------|---------------------------|-----------------------------------|
|                                                                                     | MW+0                                                                  | MW+1                                                                                              | MW+2 from natural isotopic abundance [in source acylium products]                           | MW+3             | MW+Na | MW + CH <sub>3</sub> CN | MW+Na +CH <sub>3</sub> CN | [M-CH <sub>3</sub> ] <sup>+</sup> |
| 1-N-methyl-4-oxo-pyridine-3-carboxamide<br>=<br>1-N-methyl-4-pyridone-3-carboxamide | HRMS<br>C <sub>7</sub> H <sub>8</sub> N <sub>2</sub> O <sub>2</sub>   | [C <sub>7</sub> H <sub>9</sub> N <sub>2</sub> O <sub>2</sub> ] <sup>+</sup><br>153.0652 (100%)    | 154.0491* (~10%)<br>[C <sub>7</sub> H <sub>8</sub> NO <sub>3</sub> ] <sup>+</sup><br>(~10%) |                  |       |                         |                           |                                   |
| O-methyl 4-pyridone-3-carboxylate                                                   | HRMS<br>C <sub>7</sub> H <sub>7</sub> NO <sub>3</sub>                 | [C <sub>7</sub> H <sub>8</sub> NO <sub>3</sub> ] <sup>+</sup><br>154.0490<br>(100%)               | 155.0522<br>(10%)                                                                           |                  |       |                         |                           | 140.0335<br>(100%)                |
| O-methyl, 1-N-methyl 4-pyridone-3-carboxylate                                       | HRMS<br>C <sub>8</sub> H <sub>9</sub> NO <sub>3</sub>                 | [C <sub>8</sub> H <sub>10</sub> NO <sub>3</sub> ] <sup>+</sup><br>168.0648 (100%)                 | 169.0681<br>(10%)                                                                           |                  |       |                         |                           | 154.0492<br>(100%)                |
| O-methyl-1-methyl-6-oxo-pyridine-3-carboxylate                                      | HRMS<br>C <sub>8</sub> H <sub>9</sub> NO <sub>3</sub>                 | [C <sub>8</sub> H <sub>10</sub> NO <sub>3</sub> ] <sup>+</sup><br>168.0647<br>(100%)              |                                                                                             |                  |       |                         | 209.69<br>(100%)          |                                   |
| 1-N-methyl-6-pyridone-3-carboxamide                                                 | HRMS<br>C <sub>7</sub> H <sub>8</sub> N <sub>2</sub> O <sub>2</sub>   | [C <sub>7</sub> H <sub>9</sub> N <sub>2</sub> O <sub>2</sub> ] <sup>+</sup><br>153.0663 (100%)    | 154.0696 (5%)                                                                               |                  |       |                         |                           |                                   |
| 1-N-methyl-2-pyridone-3-carboxamide                                                 | HRMS                                                                  | [C <sub>7</sub> H <sub>9</sub> N <sub>2</sub> O <sub>2</sub> ] <sup>+</sup><br>153.0648<br>(100%) | 154.0487* (~10%)<br>[C <sub>7</sub> H <sub>8</sub> NO <sub>3</sub> ] <sup>+</sup><br>(~10%) |                  |       |                         |                           |                                   |
| 4-pyridone-3-carboxamide                                                            | HRMS<br>C <sub>6</sub> H <sub>6</sub> N <sub>2</sub> O <sub>2</sub>   | [C <sub>6</sub> H <sub>7</sub> N <sub>2</sub> O <sub>2</sub> ] <sup>+</sup><br>139.0495 (100%)    | 140.0334 (~10%)<br>[C <sub>6</sub> H <sub>6</sub> NO <sub>3</sub> ] <sup>+</sup><br>(~10%)  |                  |       |                         |                           |                                   |
| 1-(2',3',5'-tri-O-acetyl-β-D-ribofuranosyl)-4-pyridone-3-carboxamide                | HRMS<br>C <sub>17</sub> H <sub>20</sub> N <sub>2</sub> O <sub>9</sub> | [C <sub>17</sub> H <sub>21</sub> N <sub>2</sub> O <sub>9</sub> ] <sup>+</sup><br>397.1228 (100%)  | 398.1220 (20%)                                                                              | 399.1276<br>(1%) |       |                         |                           |                                   |

|                                                                                           |                                                                       |                                                                                                  |                                                                                                             |                |              |
|-------------------------------------------------------------------------------------------|-----------------------------------------------------------------------|--------------------------------------------------------------------------------------------------|-------------------------------------------------------------------------------------------------------------|----------------|--------------|
| <i>4-pyridone-3-carboxamide-1-β-D-ribofuranoside</i>                                      | HRMS<br>C <sub>11</sub> H <sub>14</sub> N <sub>2</sub> O <sub>6</sub> | [C <sub>11</sub> H <sub>15</sub> N <sub>2</sub> O <sub>6</sub> ] <sup>+</sup><br>271.0918 (100%) | 272.0951 (10%)<br>[C <sub>11</sub> H <sub>14</sub> NO <sub>7</sub> ] <sup>+</sup><br>272.0770 not selected  |                |              |
| <i>6-pyridone 3-carboxamide</i>                                                           | HRMS<br>C <sub>6</sub> H <sub>6</sub> N <sub>2</sub> O <sub>2</sub>   | [C <sub>6</sub> H <sub>7</sub> N <sub>2</sub> O <sub>2</sub> ] <sup>+</sup><br>139.0499 (100%)   | 140.0532 (5%)                                                                                               |                |              |
| <i>1-(2',3',5'-tri-O-acetyl-β-D-ribofuranosyl)-6-pyridone-3-carboxamide</i>               | MS (ES)                                                               | 397.63 (32%)                                                                                     |                                                                                                             | 419.56 (55%)   | 460.67 (30%) |
| <i>6-pyridone-3-carboxamide-1-β-D-ribofuranoside</i>                                      | HRMS<br>C <sub>11</sub> H <sub>14</sub> N <sub>2</sub> O <sub>6</sub> | [C <sub>11</sub> H <sub>15</sub> N <sub>2</sub> O <sub>6</sub> ] <sup>+</sup><br>271.0938 (100%) | 272.0971 (10%)                                                                                              |                |              |
| <i>1-(2', 3', 5'-tri-O-acetyl-β-D-ribofuranosyl)-4-pyridone-3-carboxylic methyl ester</i> | HRMS<br>C <sub>17</sub> H <sub>20</sub> N <sub>2</sub> O <sub>9</sub> | [C <sub>17</sub> H <sub>21</sub> N <sub>2</sub> O <sub>9</sub> ] <sup>+</sup><br>412.1244 (100%) | 413.1275 (20%)                                                                                              | 414.1292 (2%)  |              |
| <i>O-methyl-4-pyridone-3-carboxylate ribonucleoside</i>                                   | HRMS<br>C <sub>12</sub> H <sub>15</sub> NO <sub>7</sub>               | [C <sub>12</sub> H <sub>16</sub> NO <sub>7</sub> ] <sup>+</sup><br>286.0929 (100%)               | 287.0960 (10%)                                                                                              |                |              |
| <i>4-pyridone-3-carboxylic acid ribonucleoside</i>                                        | HRMS<br>C <sub>11</sub> H <sub>13</sub> NO <sub>7</sub>               | [C <sub>11</sub> H <sub>14</sub> NO <sub>7</sub> ] <sup>+</sup><br>272.0768 (100%)               | 273.0801 (10%)                                                                                              |                |              |
| <i>2-pyridone-3-carboxamide</i>                                                           | HRMS<br>C <sub>6</sub> H <sub>6</sub> N <sub>2</sub> O <sub>2</sub>   | [C <sub>6</sub> H <sub>7</sub> N <sub>2</sub> O <sub>2</sub> ] <sup>+</sup><br>139.0493 (100%)   | 140.0333 (~10%)<br>[C <sub>6</sub> H <sub>6</sub> NO <sub>3</sub> ] <sup>+</sup><br>(~30%)                  |                |              |
| <i>N-methyl-2-pyridone-3-carboxamide</i>                                                  | HRMS<br>C <sub>7</sub> H <sub>8</sub> N <sub>2</sub> O <sub>2</sub>   | [C <sub>7</sub> H <sub>9</sub> N <sub>2</sub> O <sub>2</sub> ] <sup>+</sup><br>153.0648 (100%)   | 154.0887 (~10%)<br>[C <sub>7</sub> H <sub>8</sub> NO <sub>3</sub> ] <sup>+</sup><br>(~10%)                  |                |              |
| <i>2-pyridone-3-carboxamide riboside</i>                                                  | HRMS<br>C <sub>11</sub> H <sub>14</sub> N <sub>2</sub> O <sub>6</sub> | [C <sub>11</sub> H <sub>15</sub> N <sub>2</sub> O <sub>6</sub> ] <sup>+</sup><br>271.0909 (100%) | 272.0941 (~10%)<br>[C <sub>11</sub> H <sub>14</sub> NO <sub>7</sub> ] <sup>+</sup><br>272.0770 not selected | 273.0958 (~2%) |              |

Figure S1:  $^1\text{H}$  NMR,  $^{13}\text{C}$  NMR and HRMS spectra

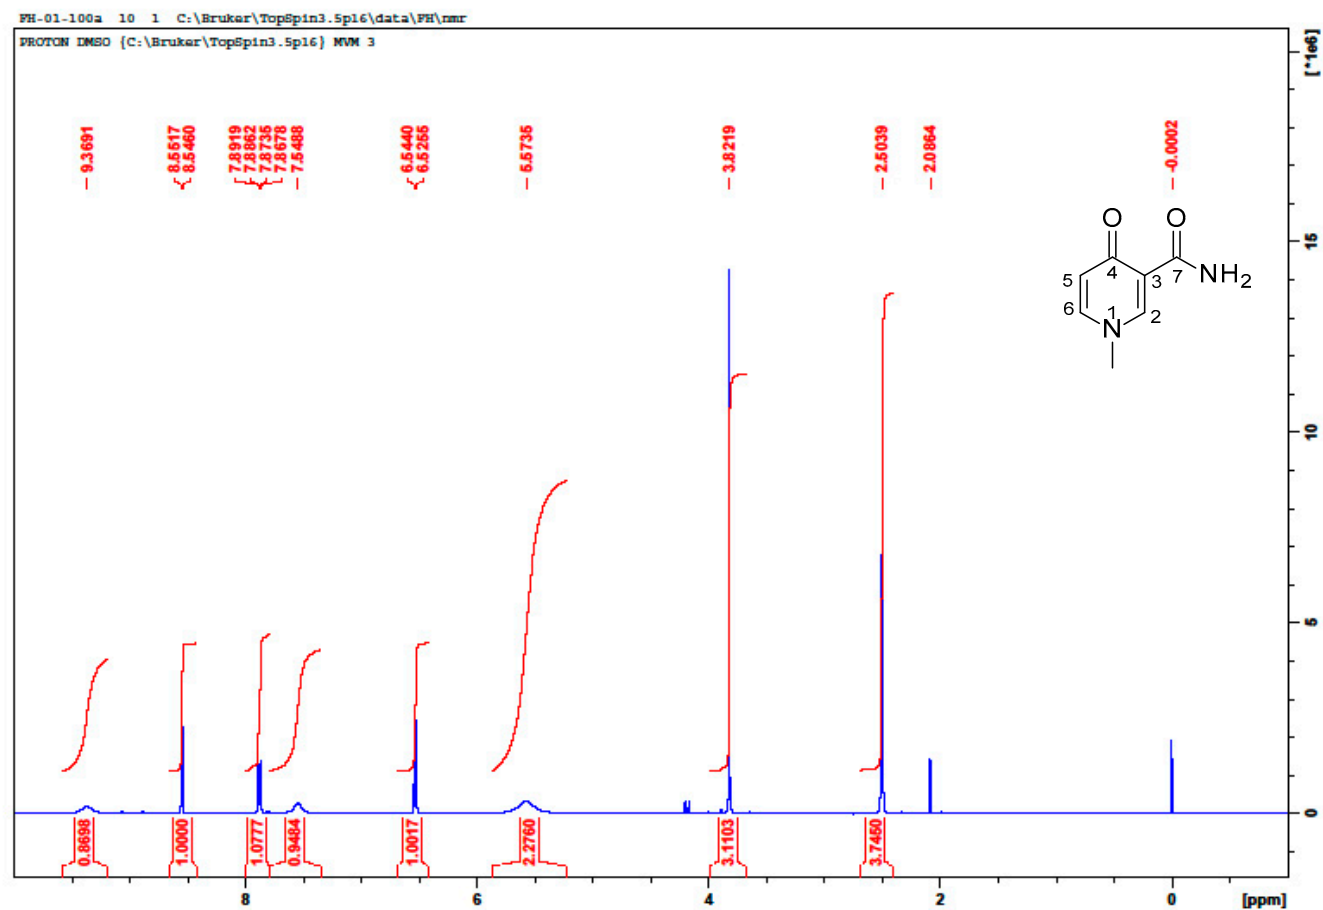

Compound 1. 400 MHz  $^1\text{H}$  NMR spectrum in DMSO

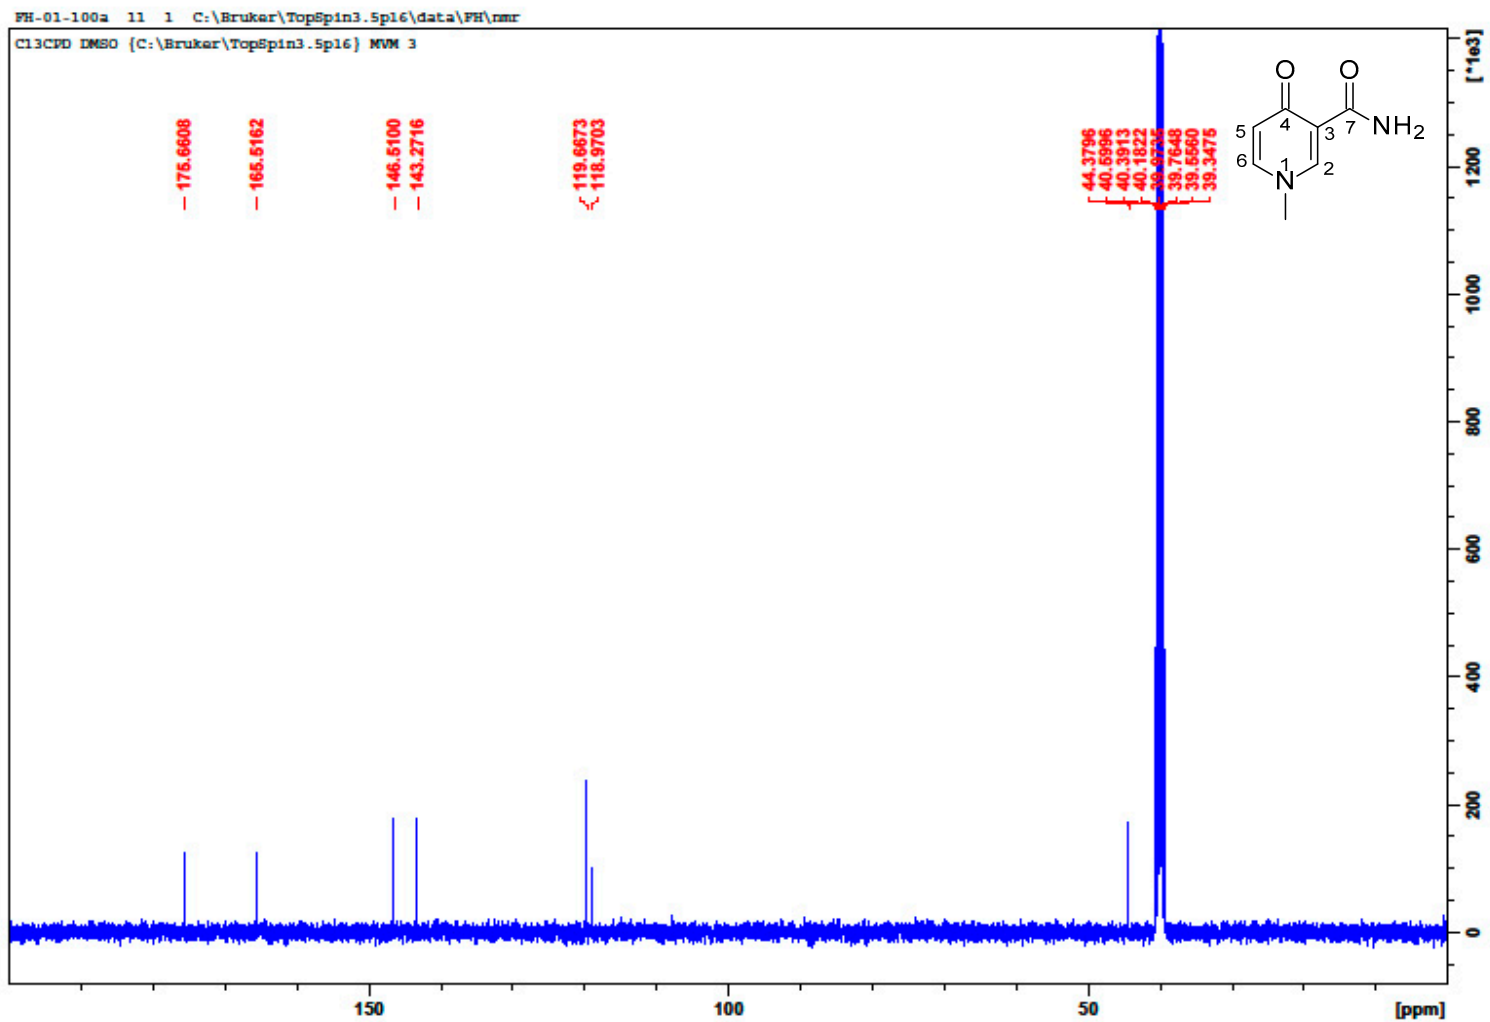

Compound 1. 400 MHz  $^{13}\text{C}$  NMR spectrum in DMSO

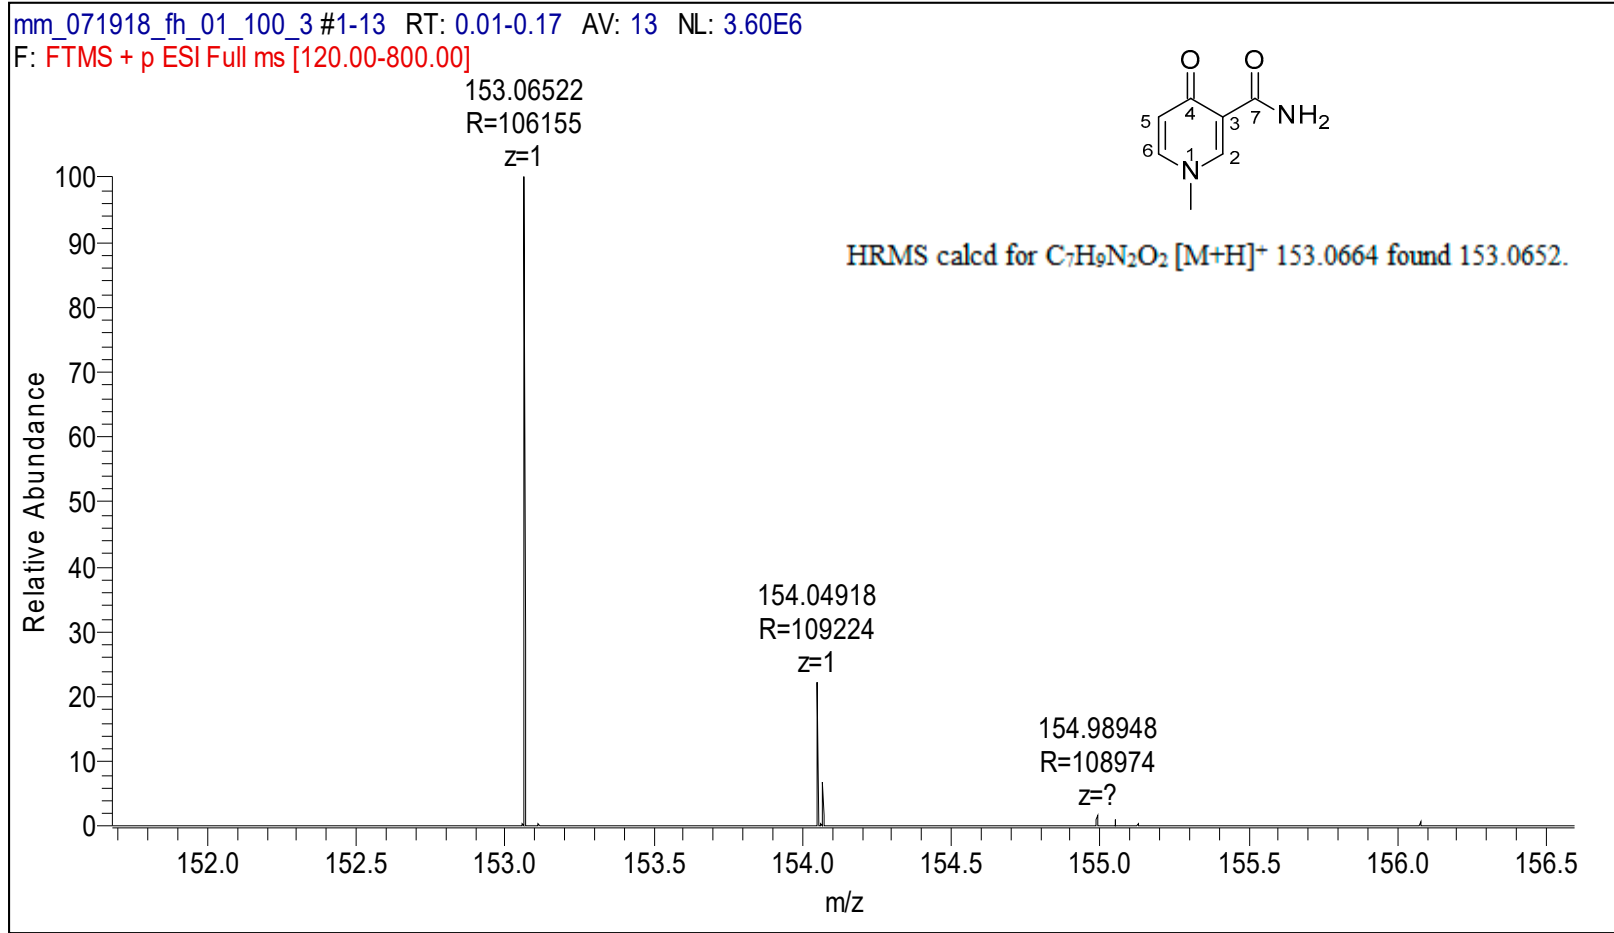

Compound 1. HRMS spectra

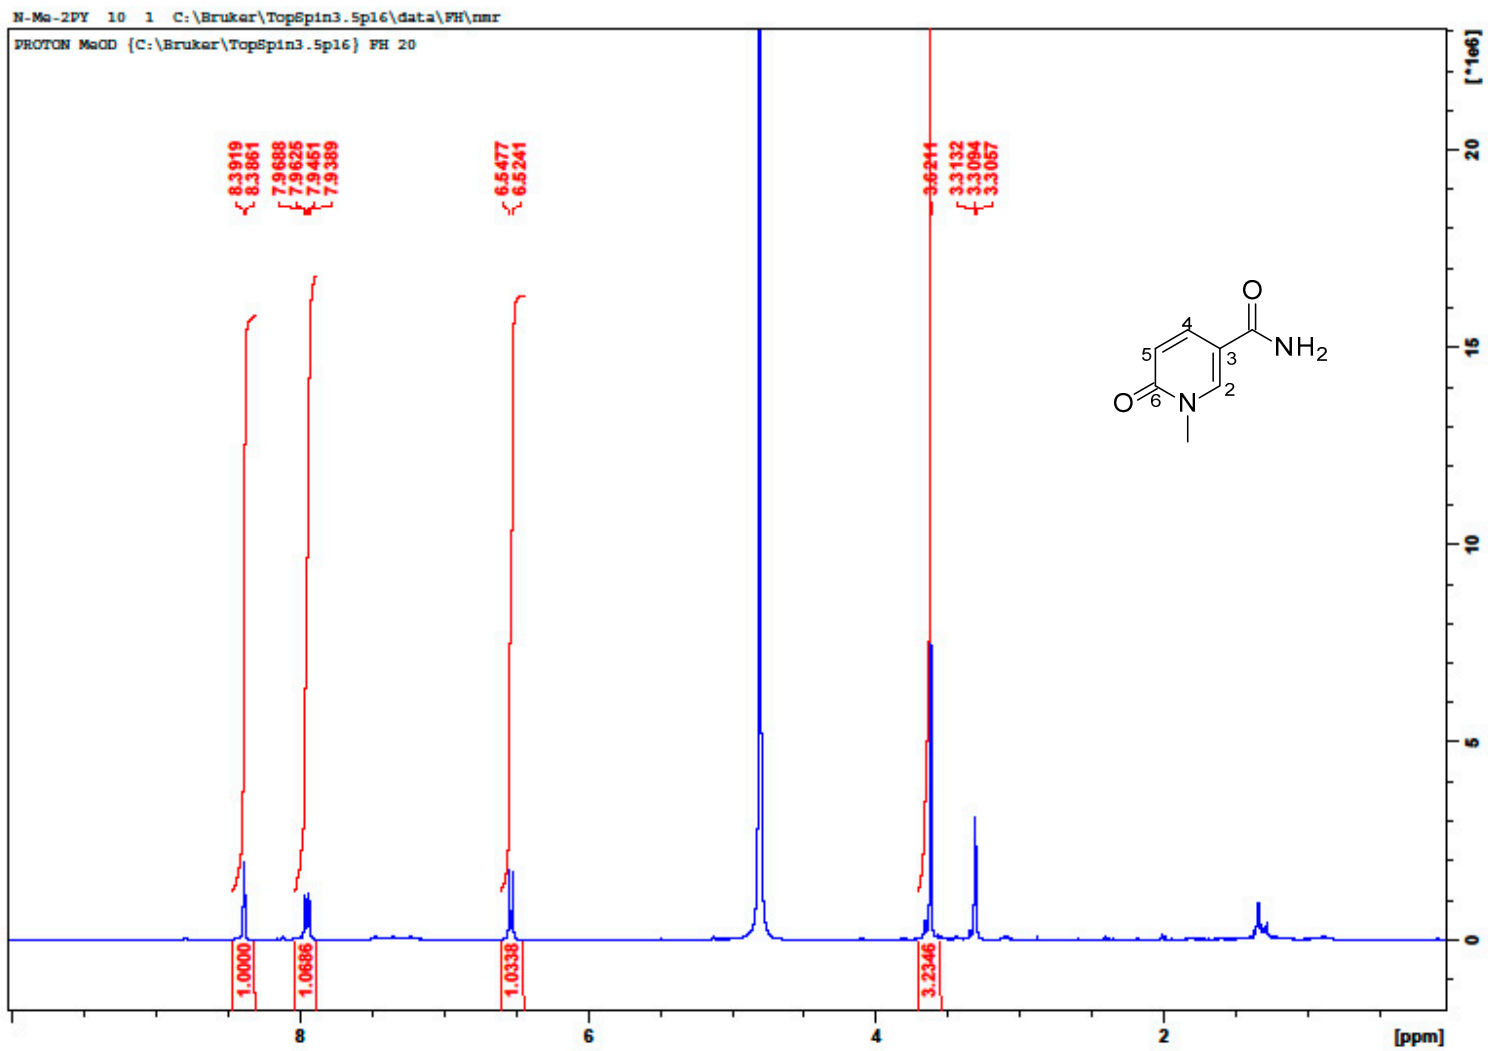

Compound 2. 400 MHz  $^1\text{H}$  NMR spectrum in MeOD

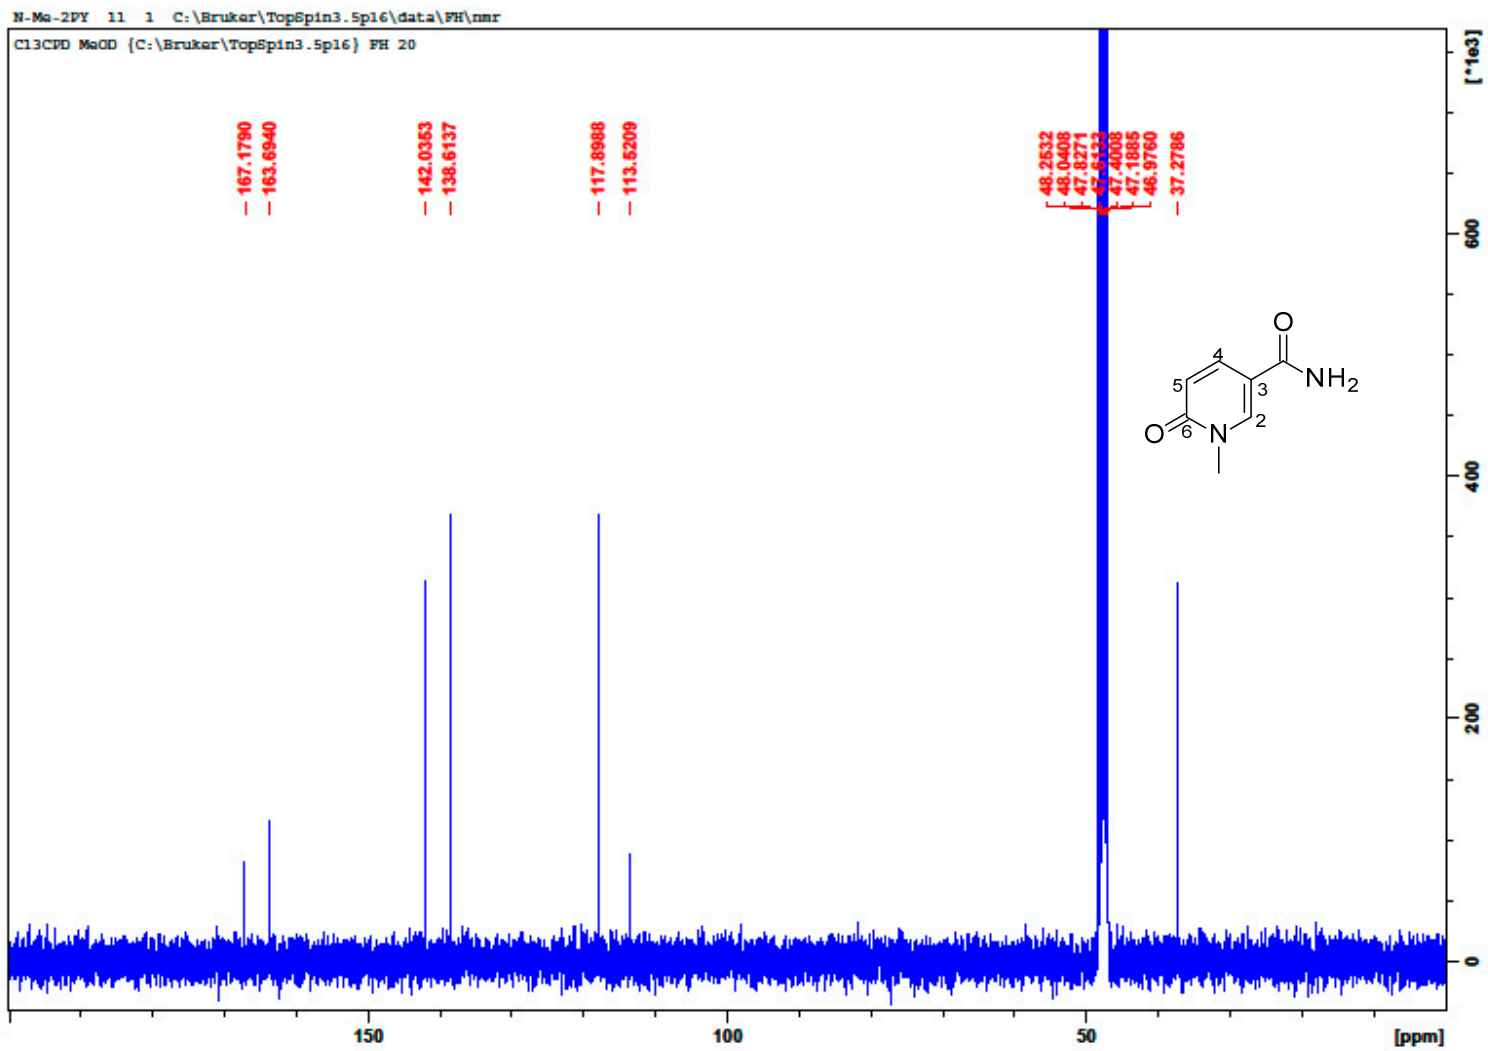

Compound 2. 400 MHz  $^{13}\text{C}$  NMR spectrum in MeOD



Sample\_3 #10-53 RT: 0.14-0.75 AV: 15 NL: 9.05E5  
T: FTMS + p ESI Full ms [110.00-700.00]

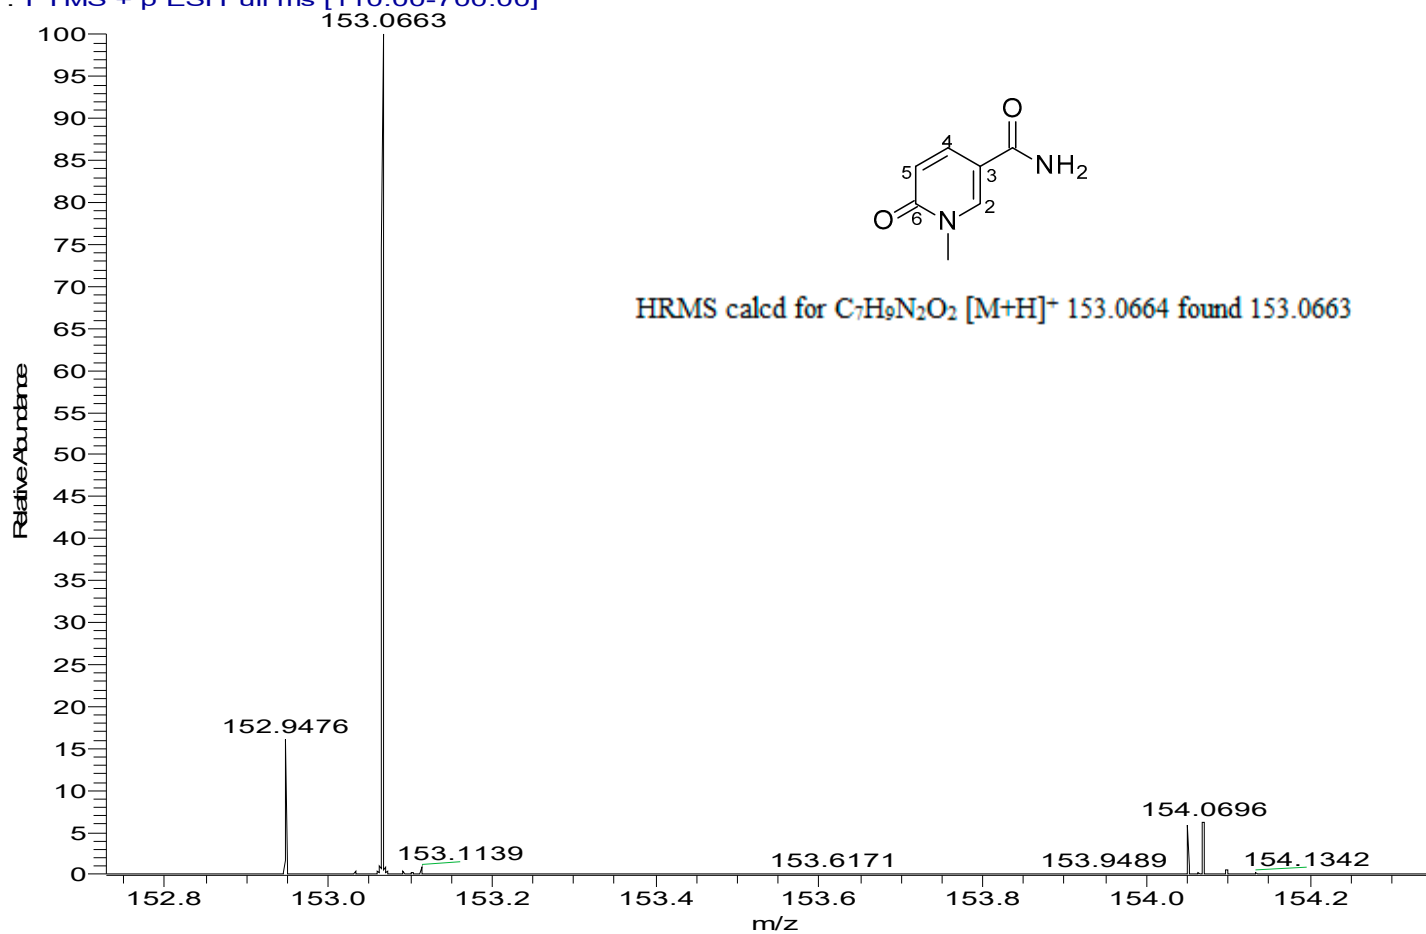

Compound 2. HRMS spectra

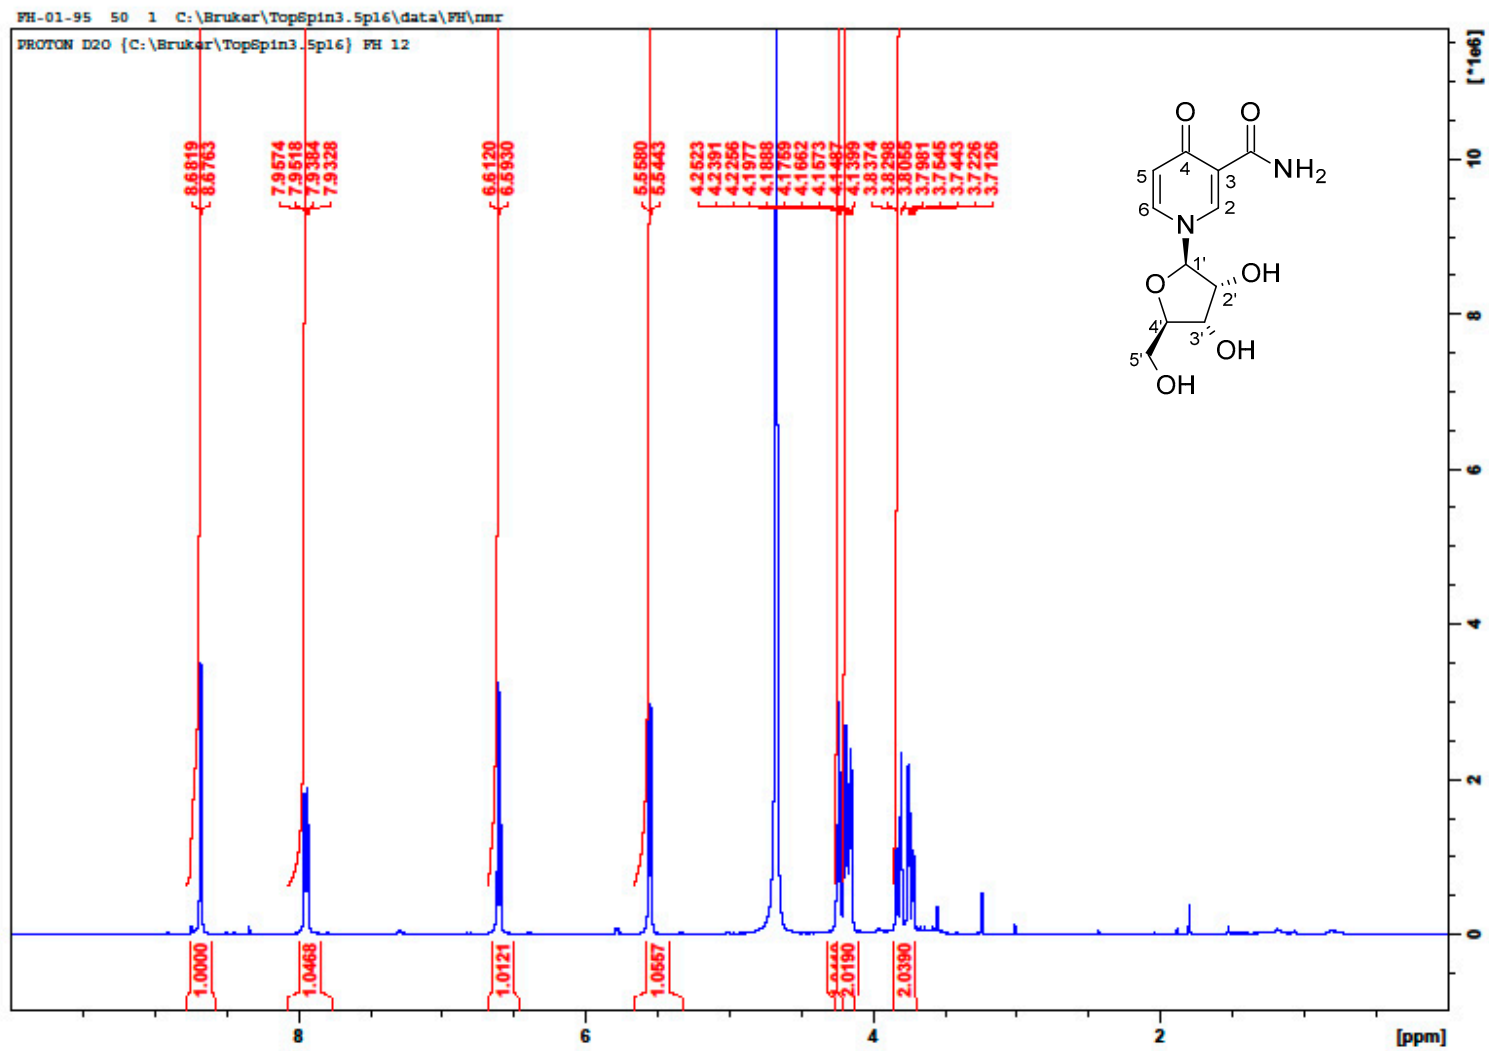

Compound 3. 400 MHz  $^1\text{H}$  NMR spectrum in  $\text{D}_2\text{O}$

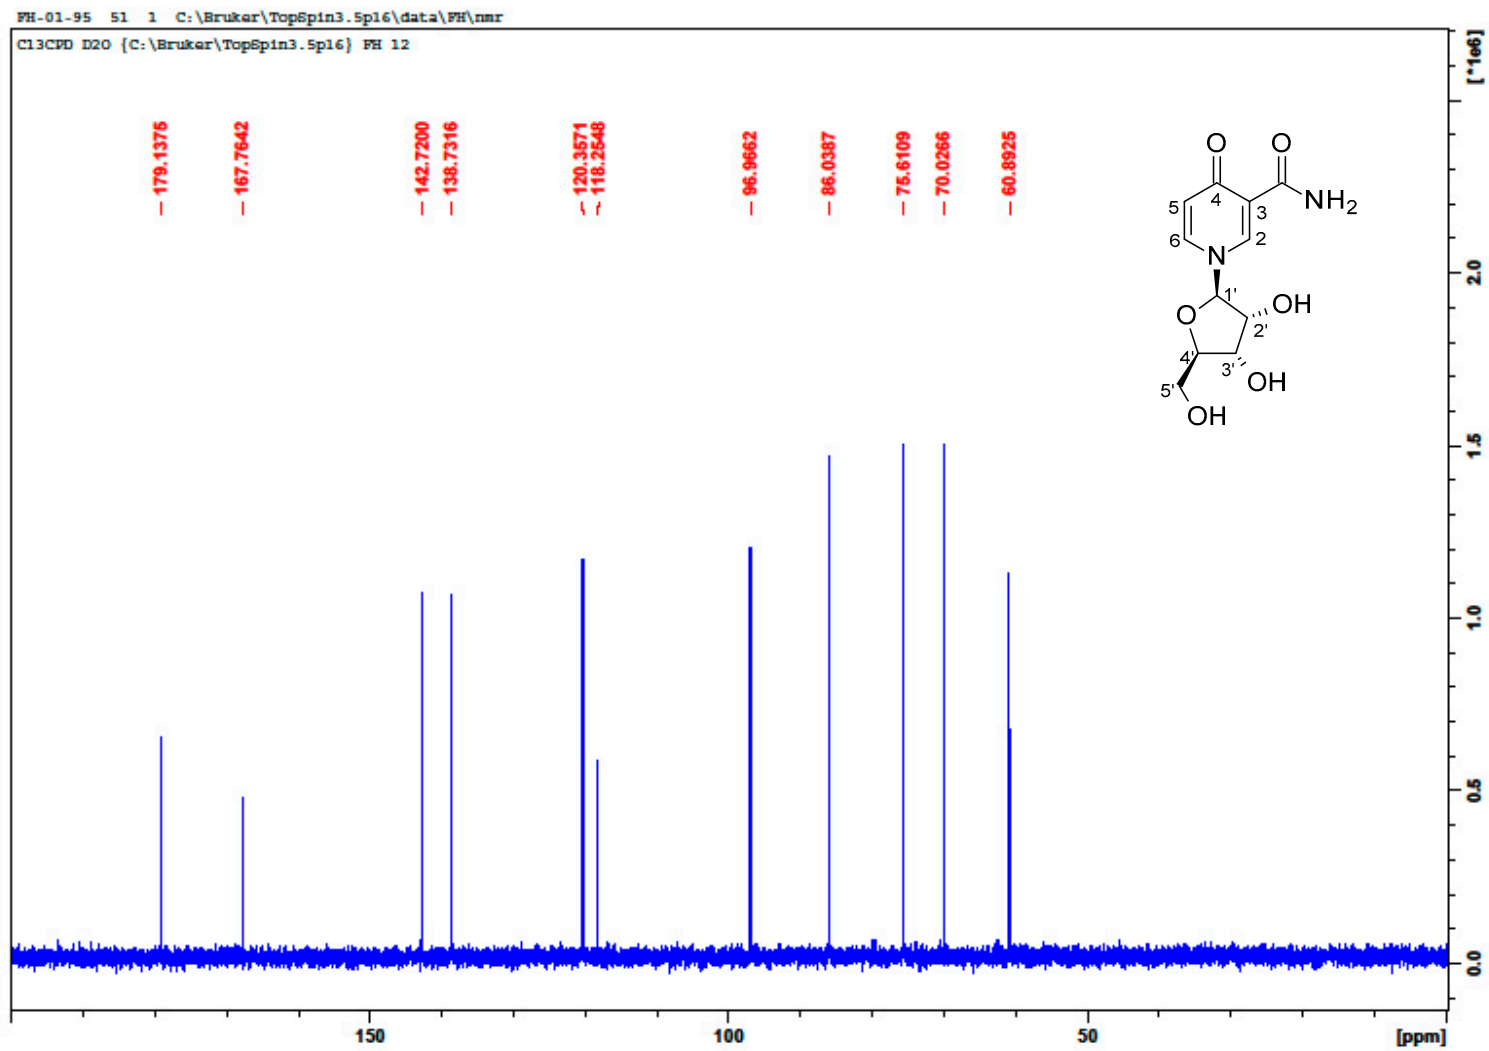

Compound 3. 400 MHz  $^{13}\text{C}$  NMR spectrum in  $\text{D}_2\text{O}$

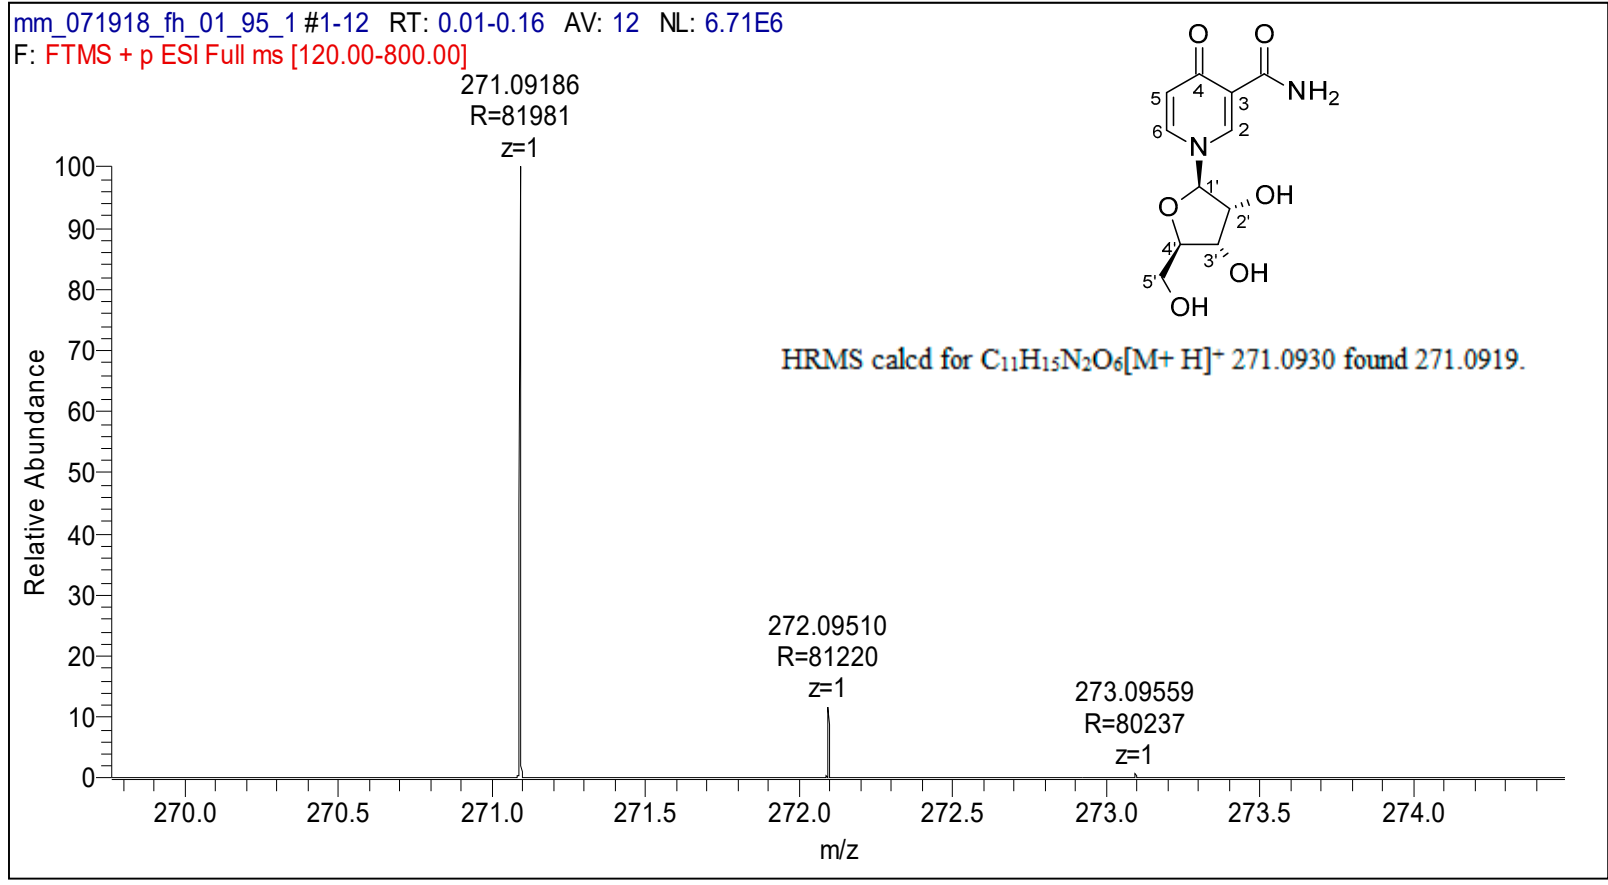

Compound 3. HRMS spectra

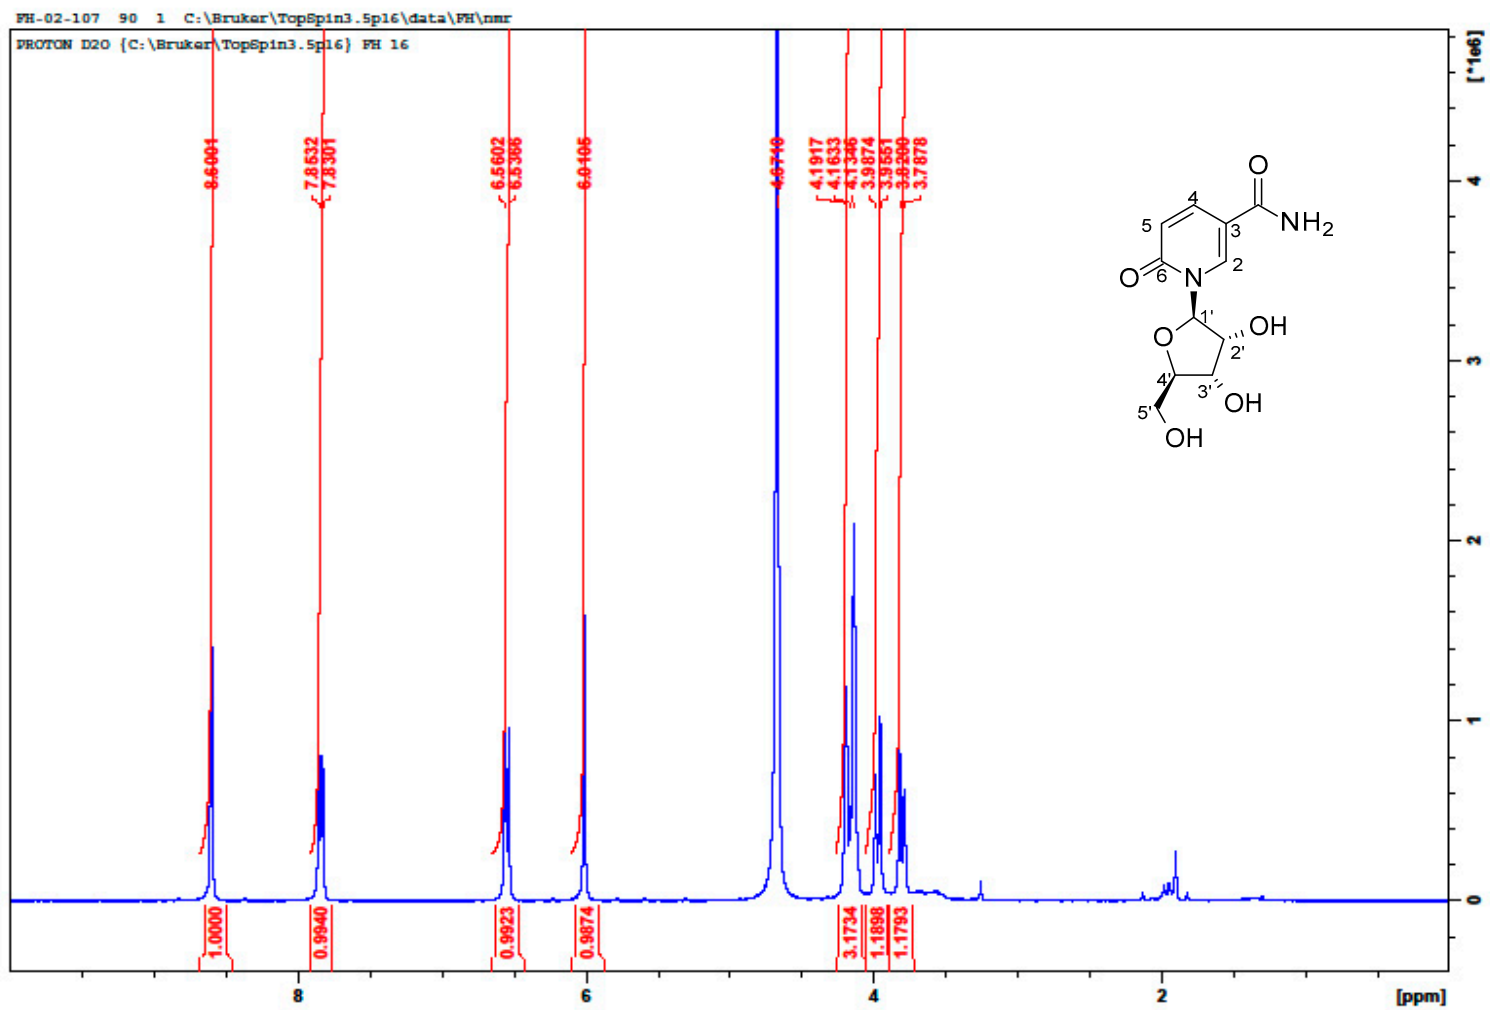

Compound 4. 400 MHz  $^1\text{H}$  NMR spectrum in  $\text{D}_2\text{O}$

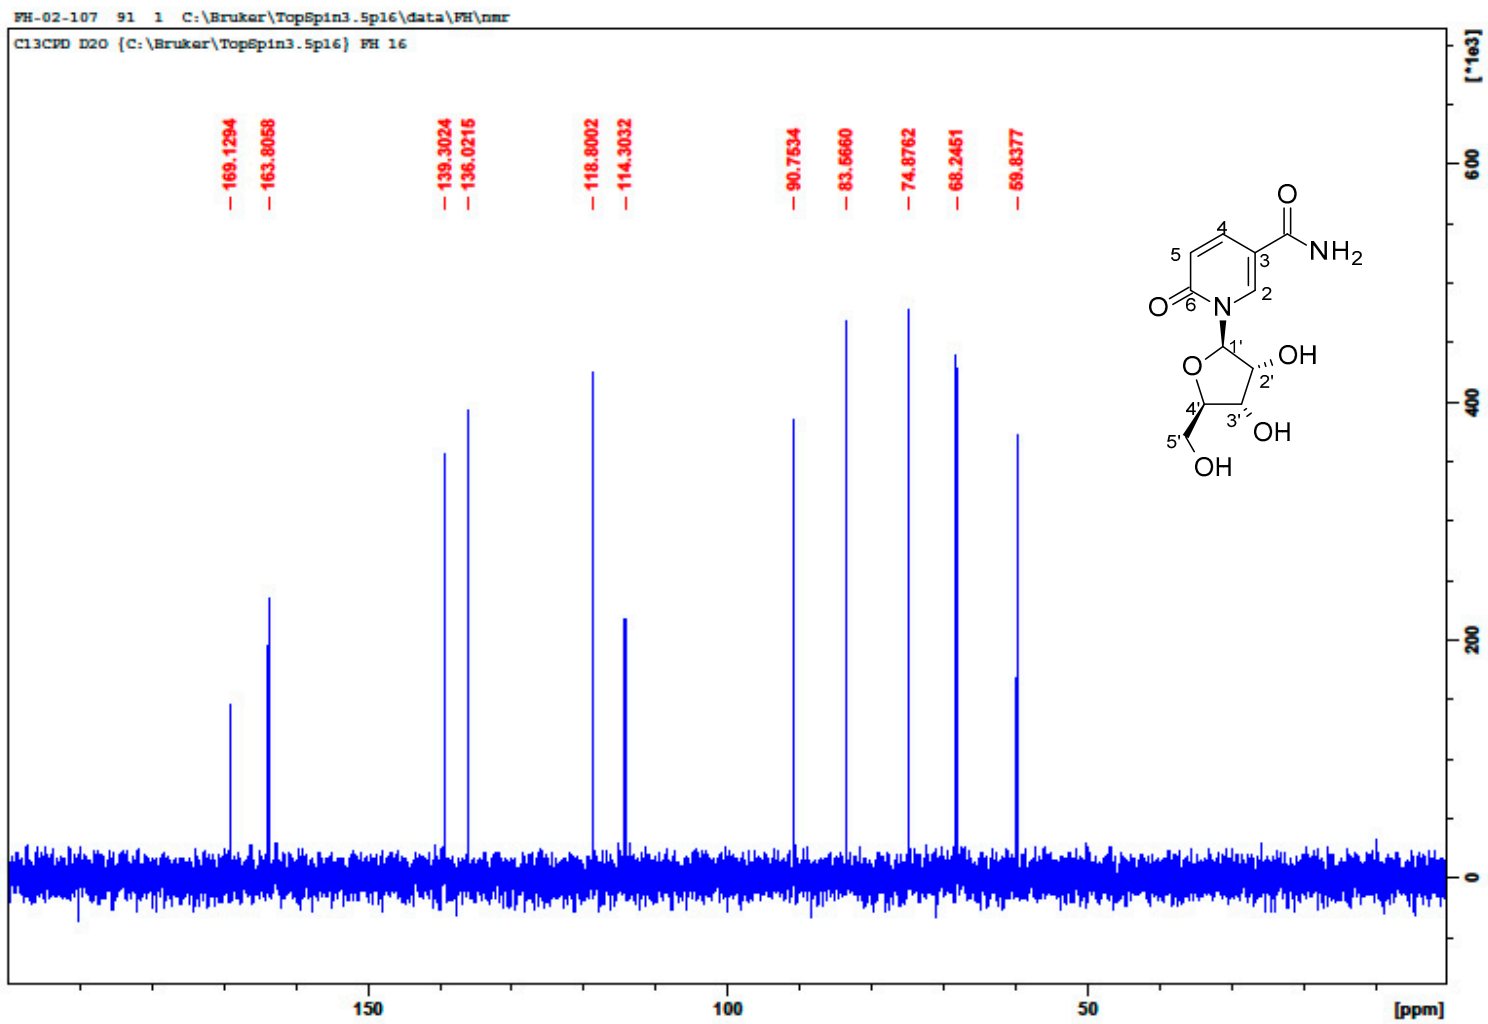

Compound 4. 400 MHz  $^{13}\text{C}$  NMR spectrum in  $\text{D}_2\text{O}$

Sample\_1 #20-48 RT: 0.32-0.65 AV: 9 NL: 1.22E6  
T: FTMS + p ESI Full ms [110.00-700.00]

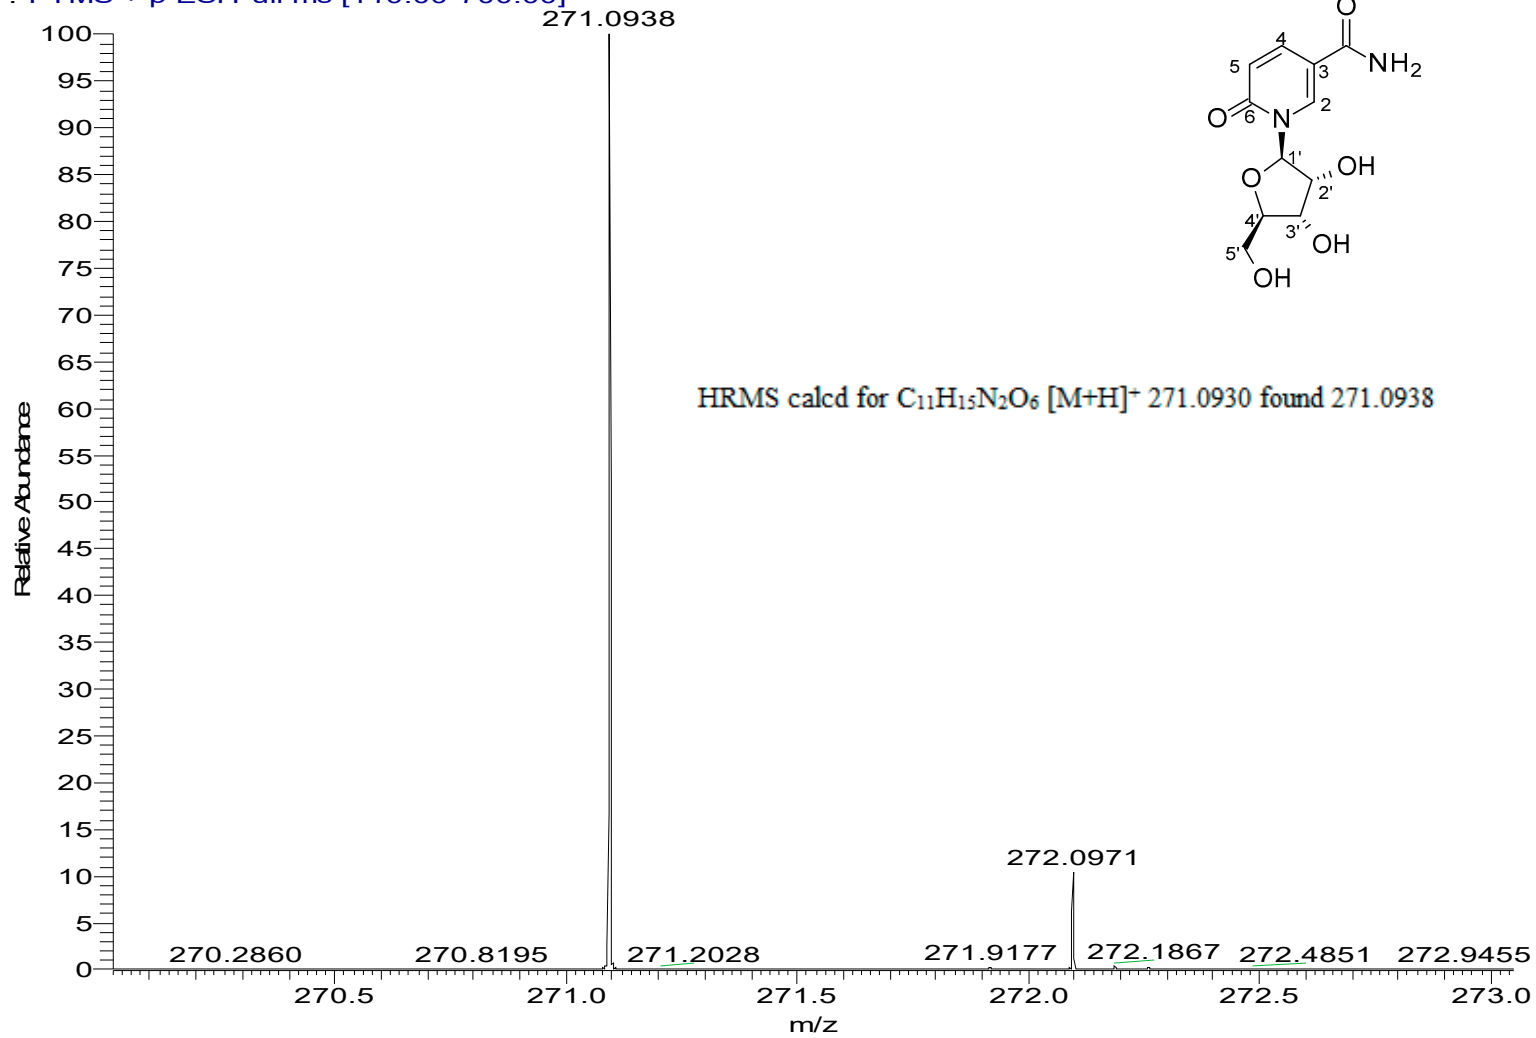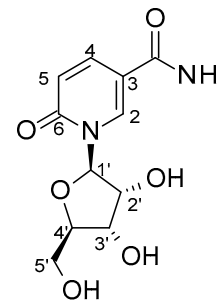

Compound 4. HRMS spectra

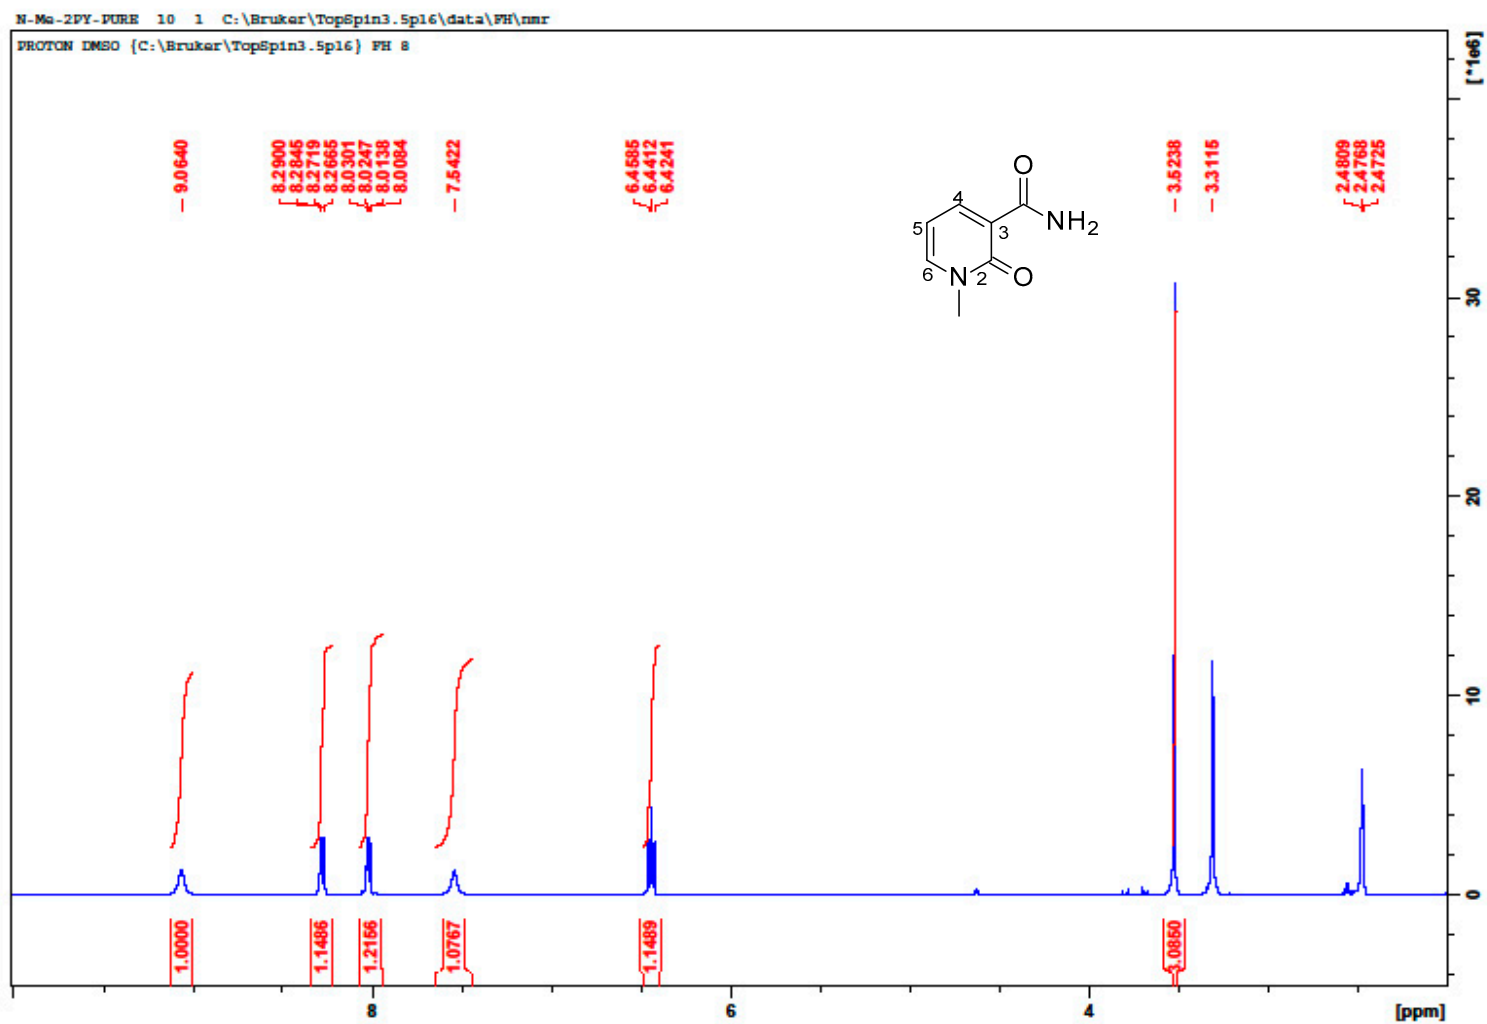

Compound 5. 400 MHz  $^1\text{H}$  NMR spectrum in DMSO



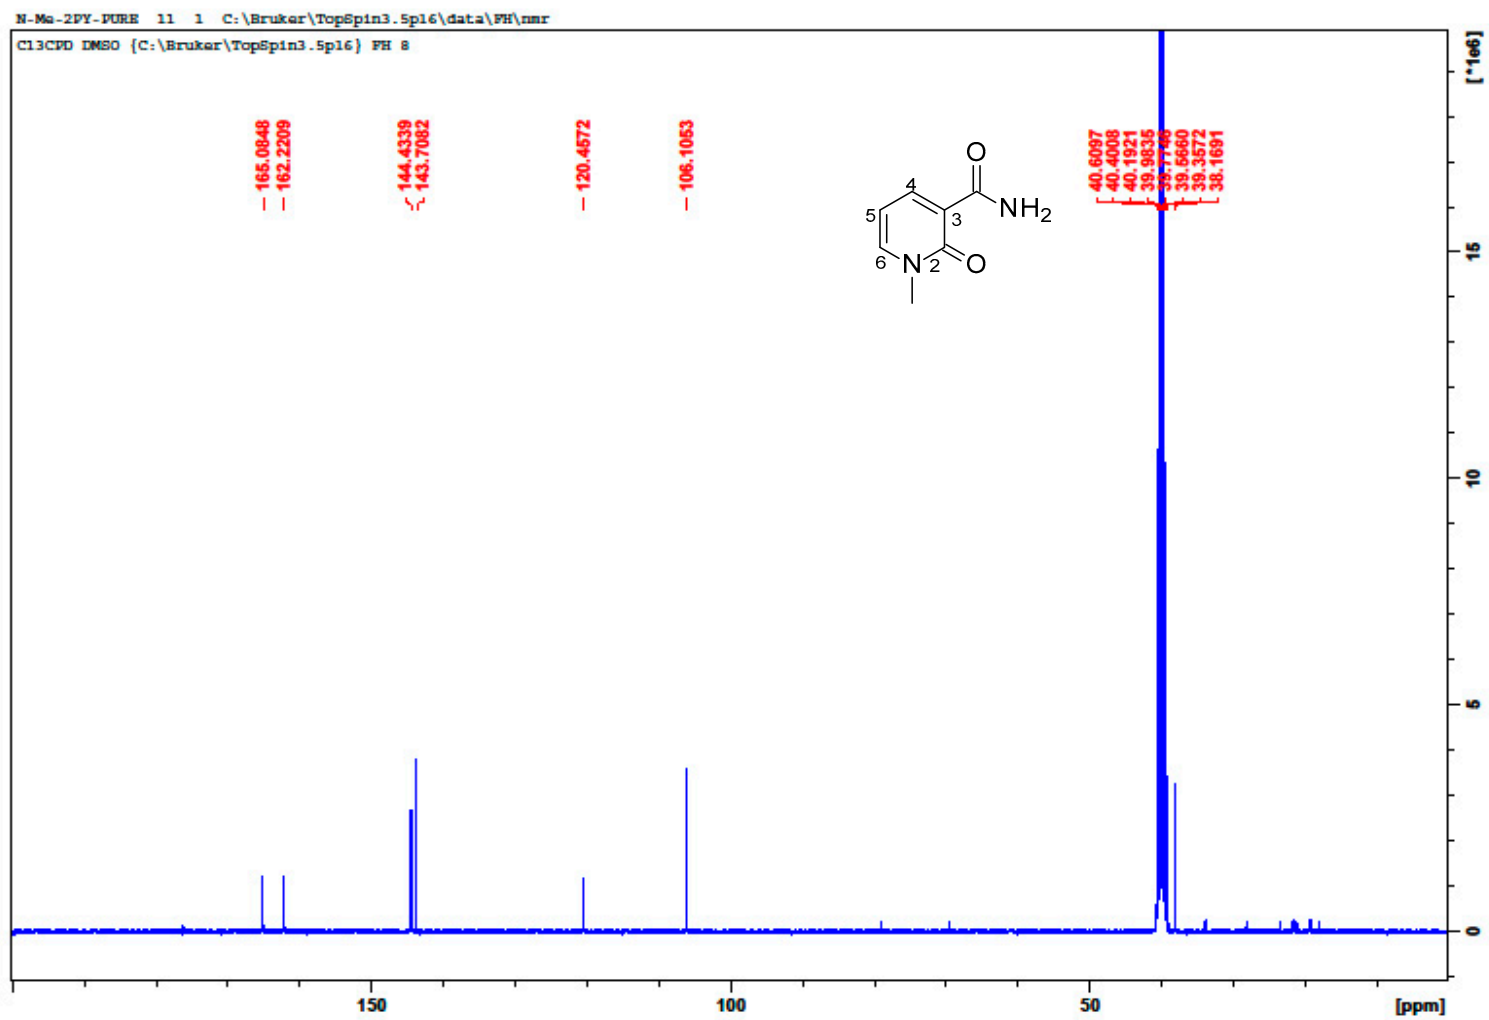

Compound 5. 400 MHz  $^{13}\text{C}$  NMR spectrum in DMSO

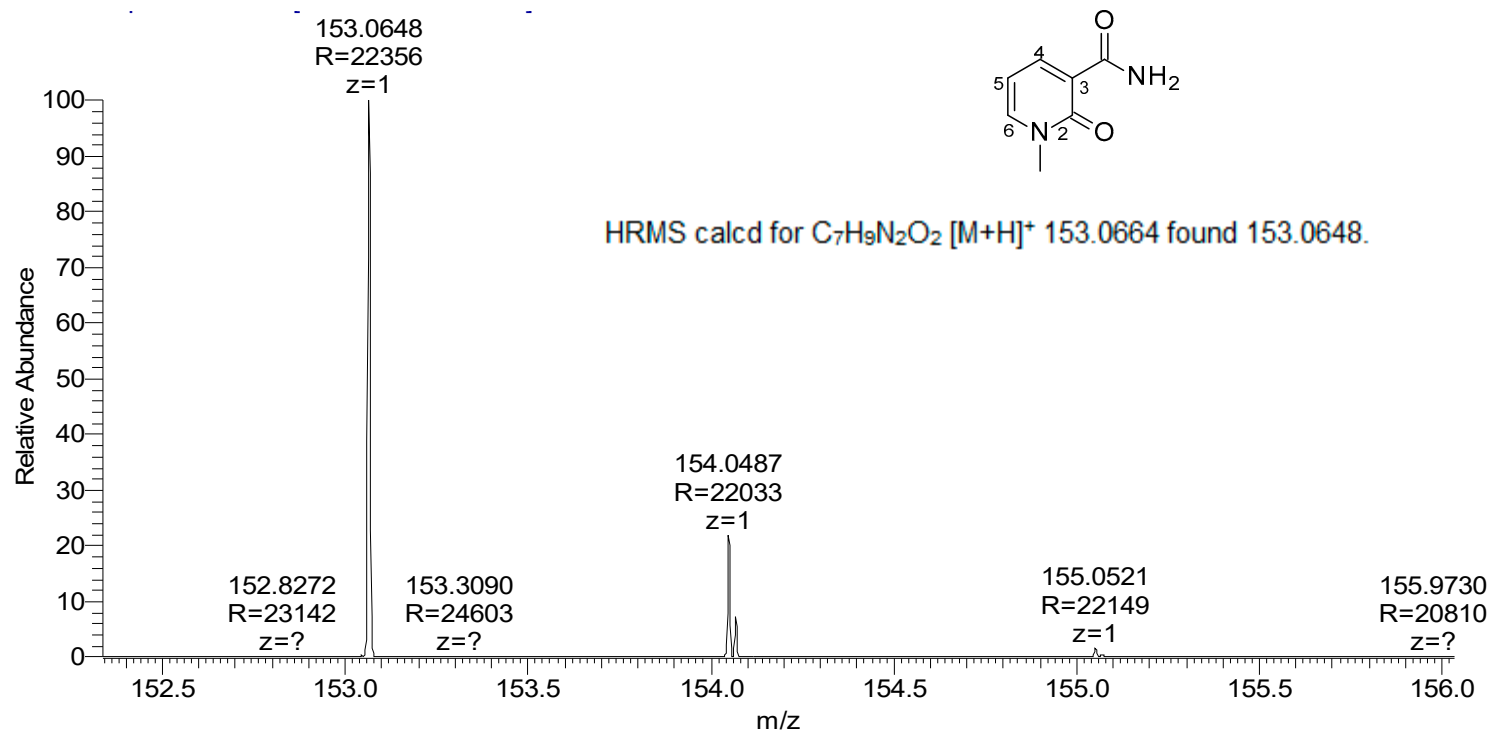

Compound 5. HRMS spectra

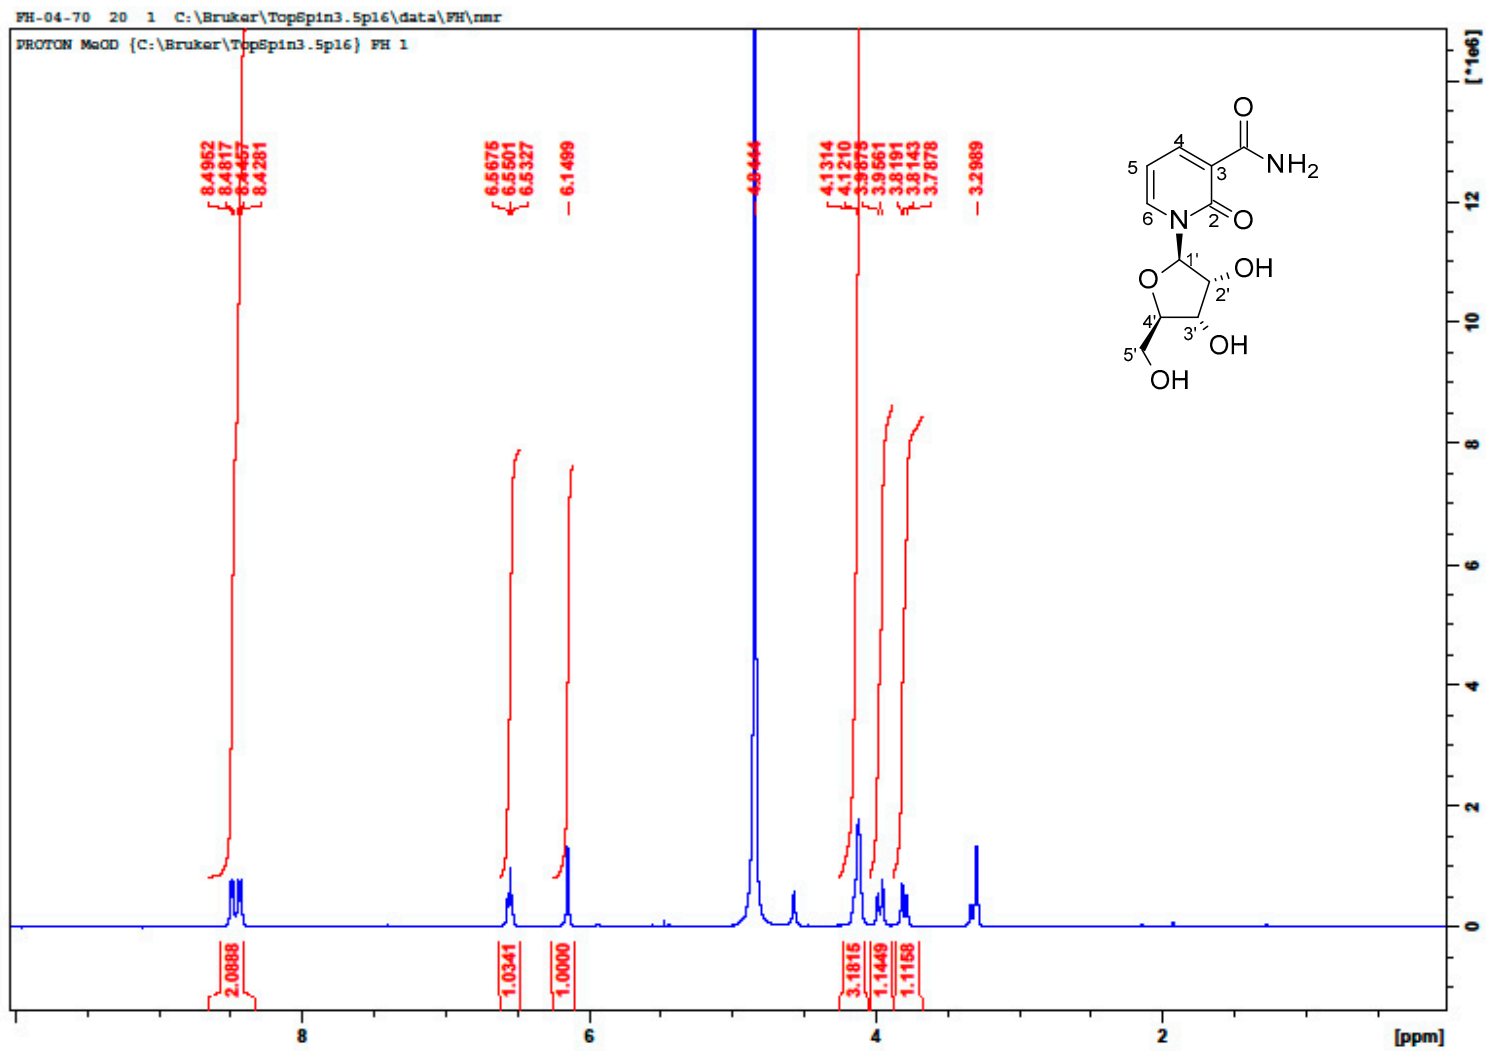

Compound 6. 400 MHz  $^1\text{H}$  NMR spectrum in  $\text{D}_2\text{O}$

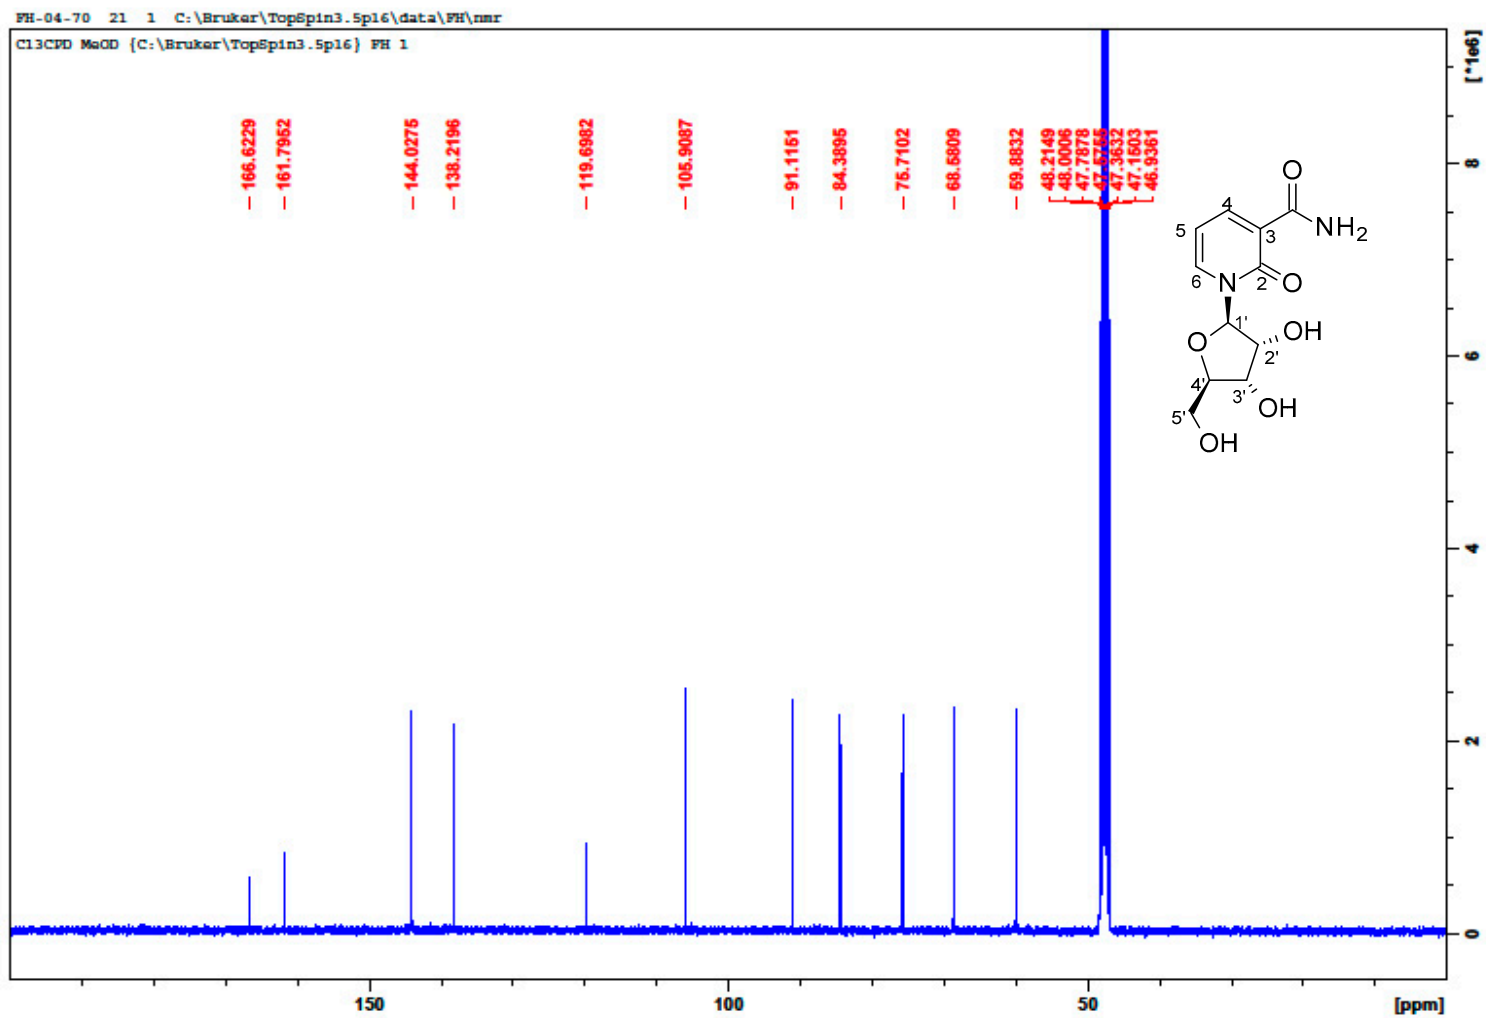

Compound 6. 400 MHz  $^{13}\text{C}$  NMR spectrum in  $\text{D}_2\text{O}$

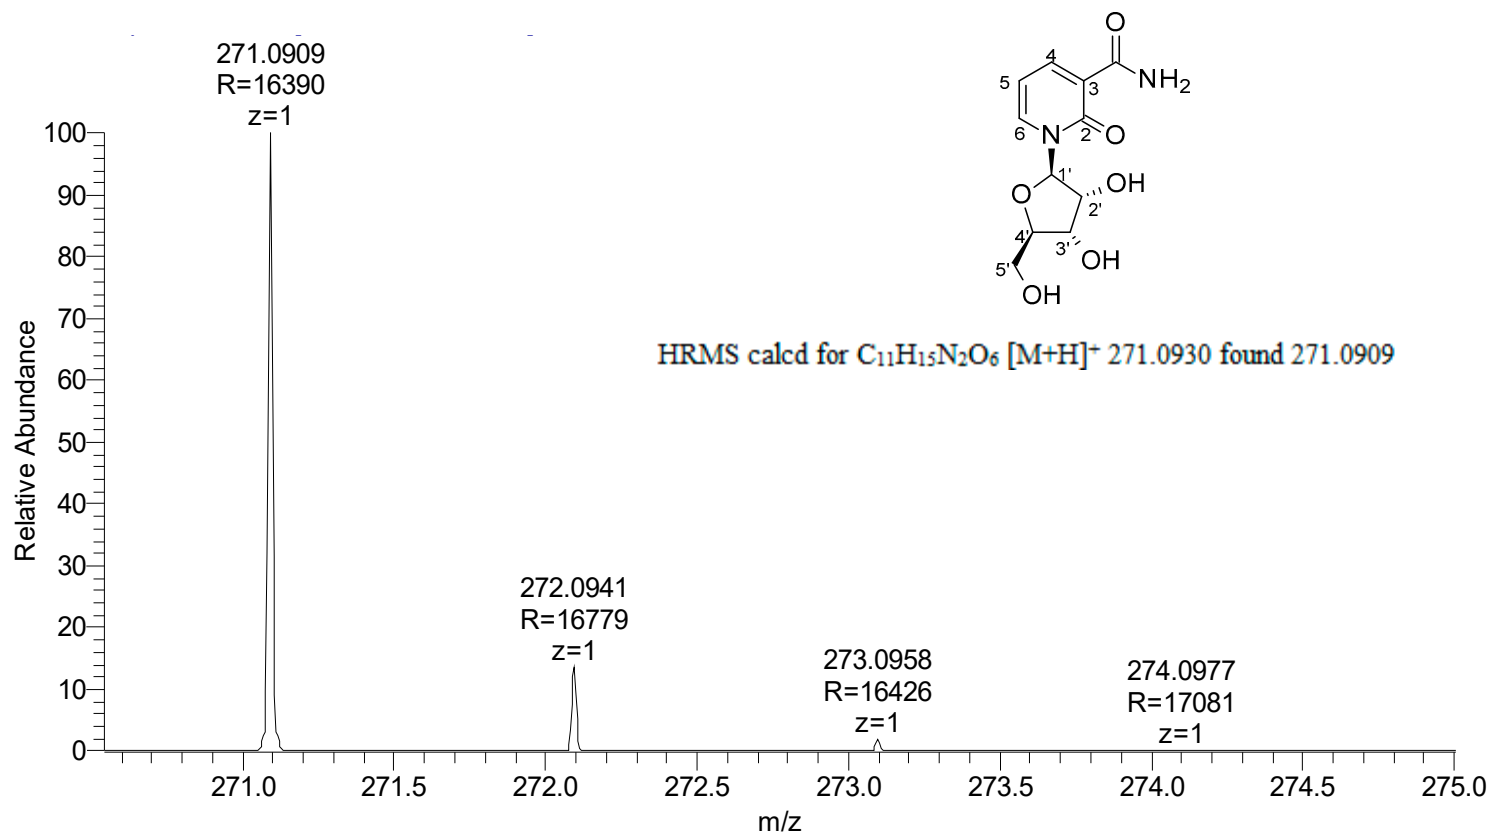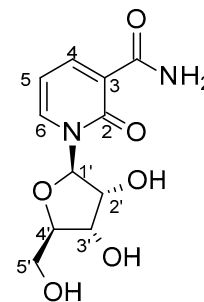

Compound 6. HRMS spectra

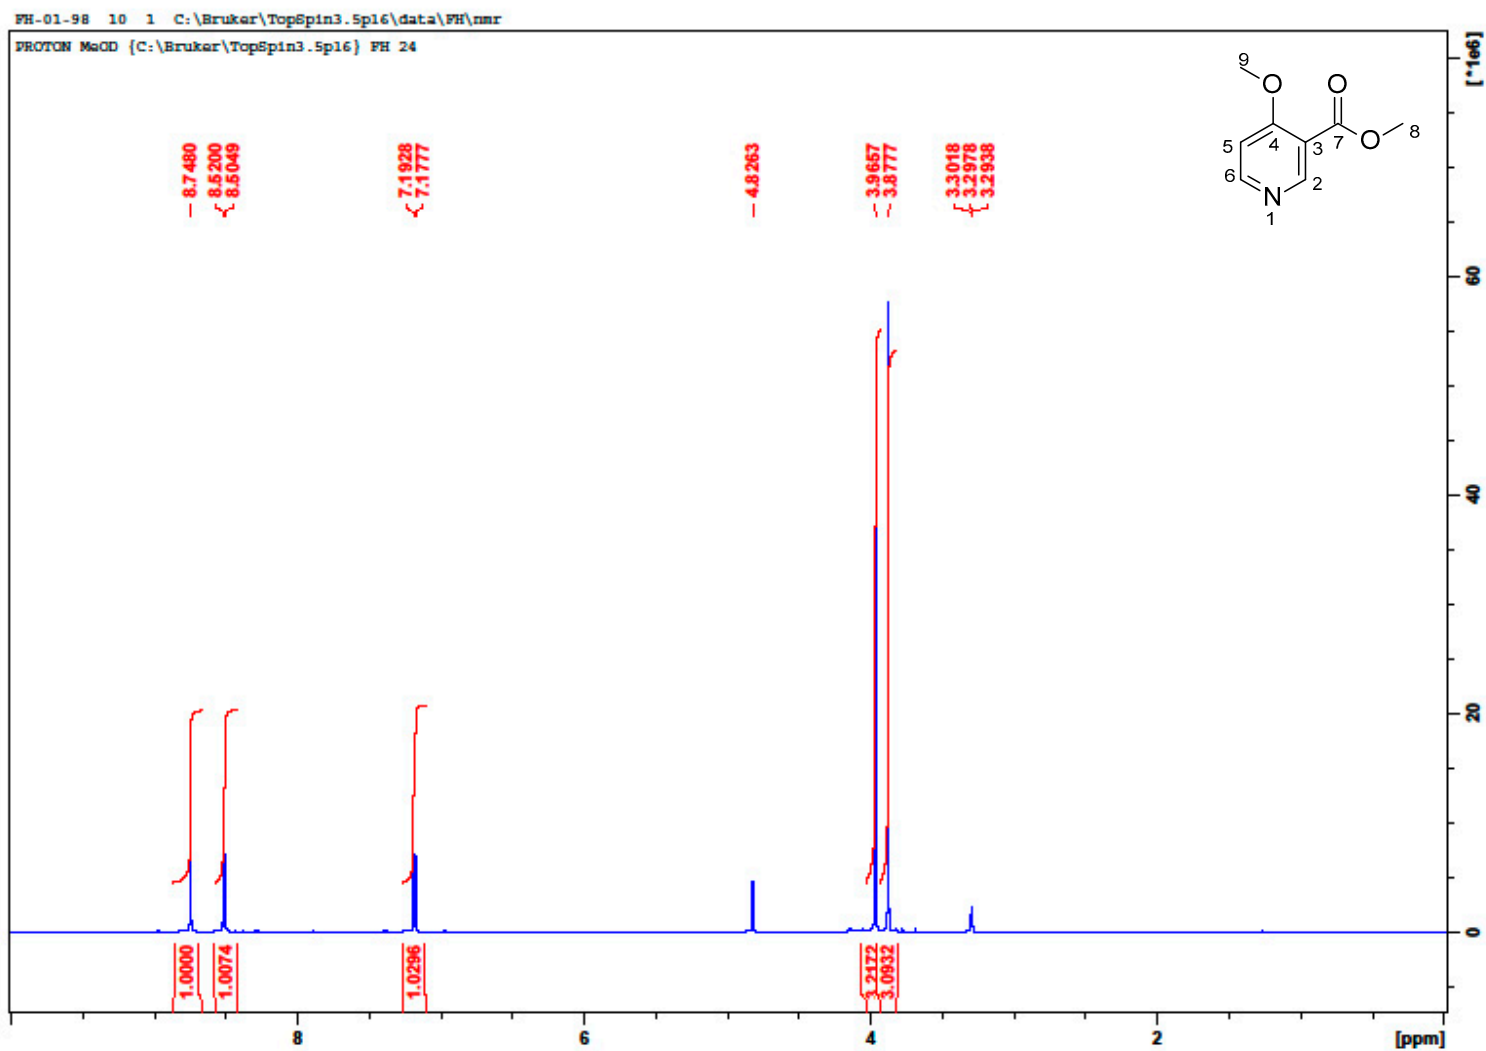

Compound 9. 400 MHz  $^1\text{H}$  NMR spectrum in MeOD

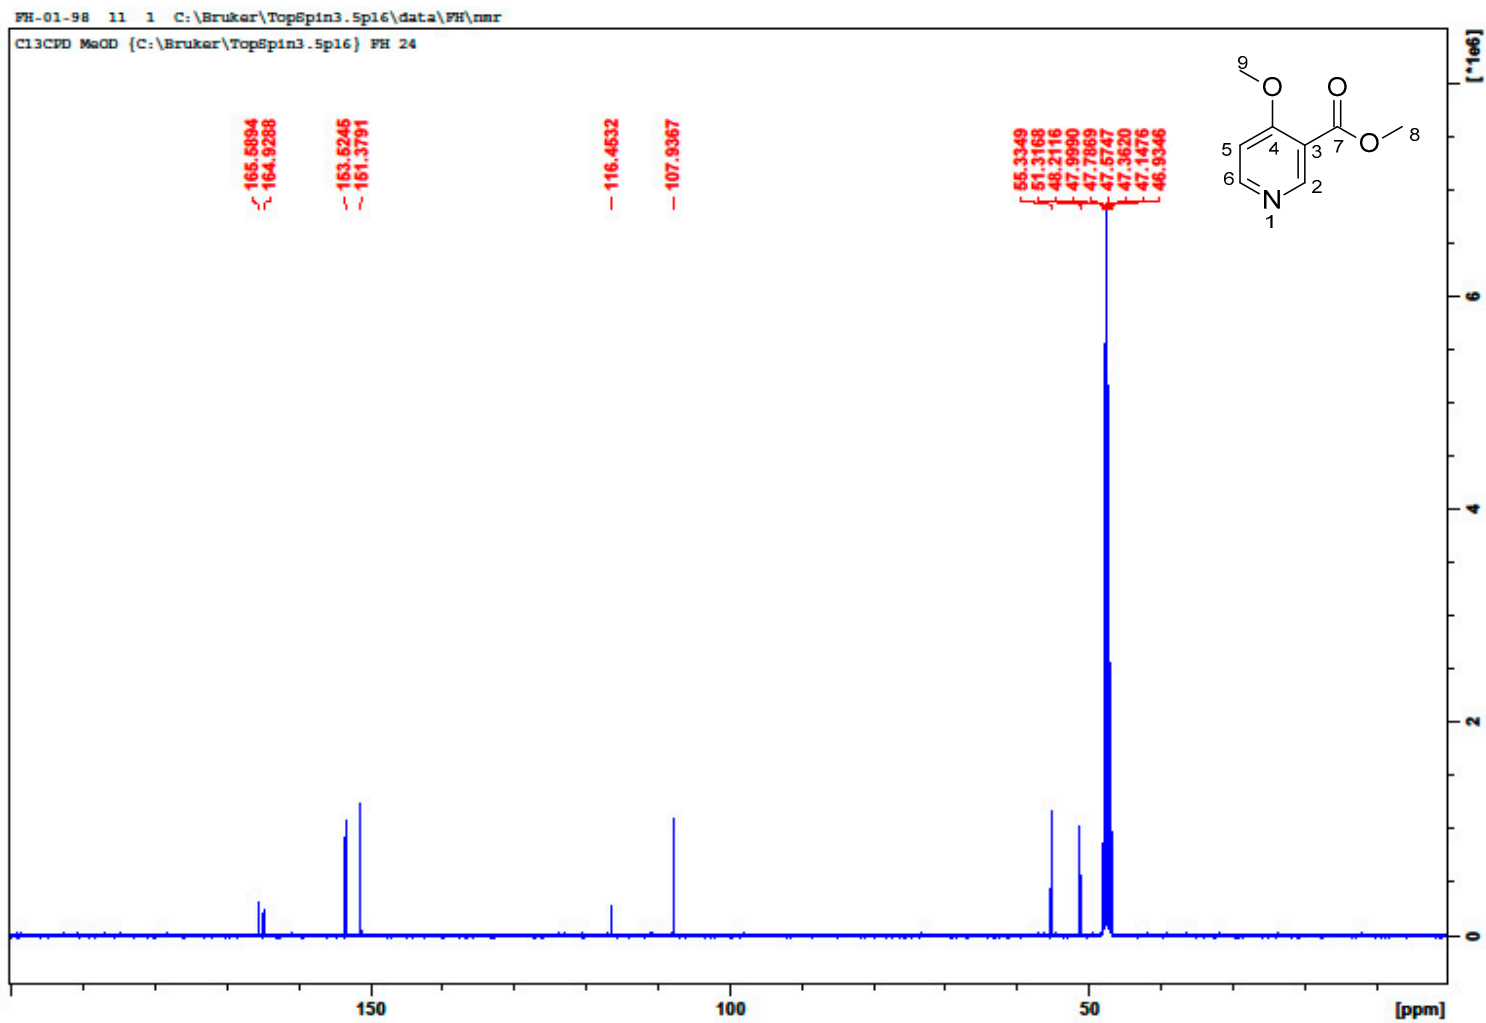

Compound 9. 400 MHz  $^{13}\text{C}$  NMR spectrum in MeOD

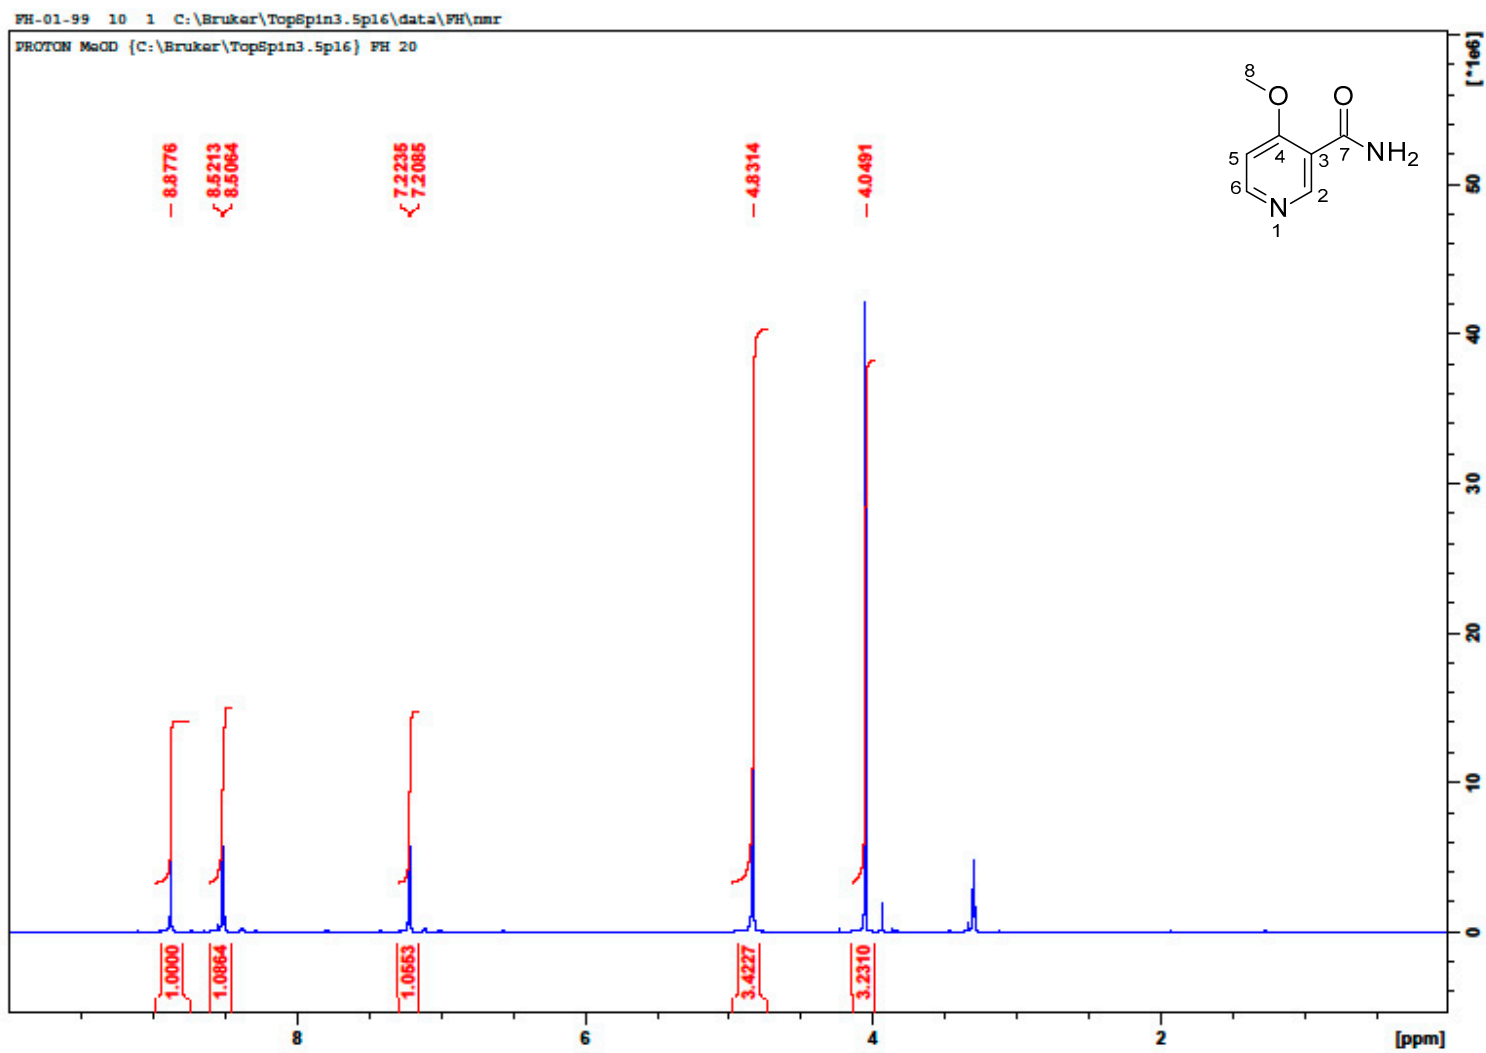

Compound 10. 400 MHz  $^1\text{H}$  NMR spectrum in MeOD



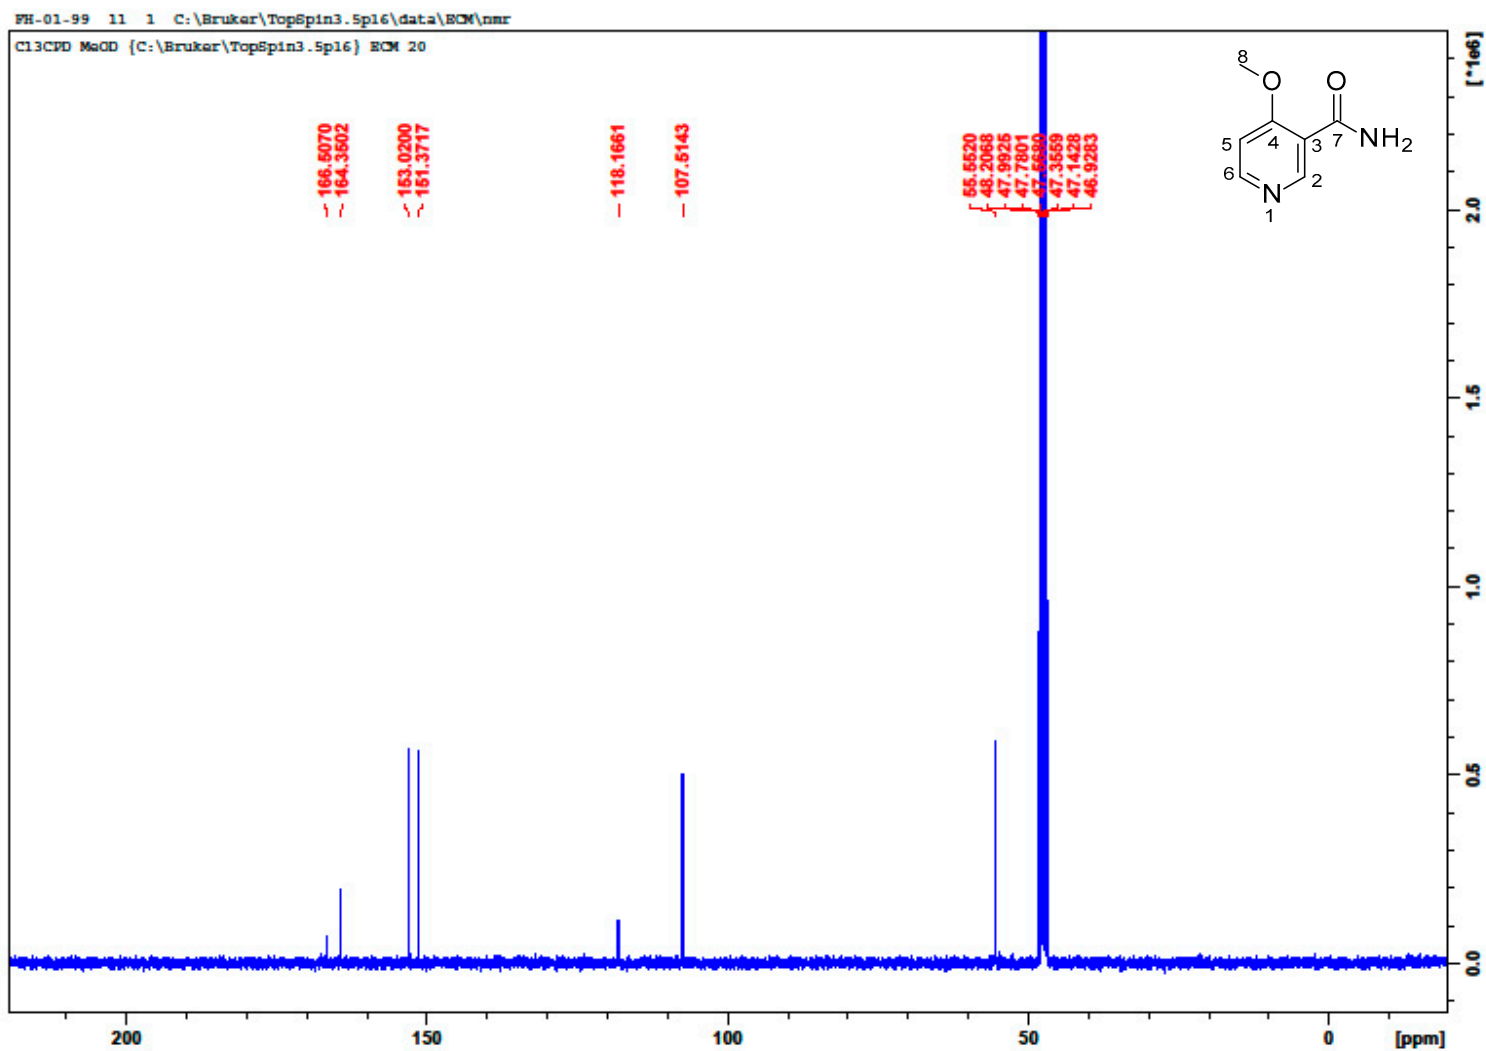

Compound 10. 400 MHz  $^{13}\text{C}$  NMR spectrum in MeOD

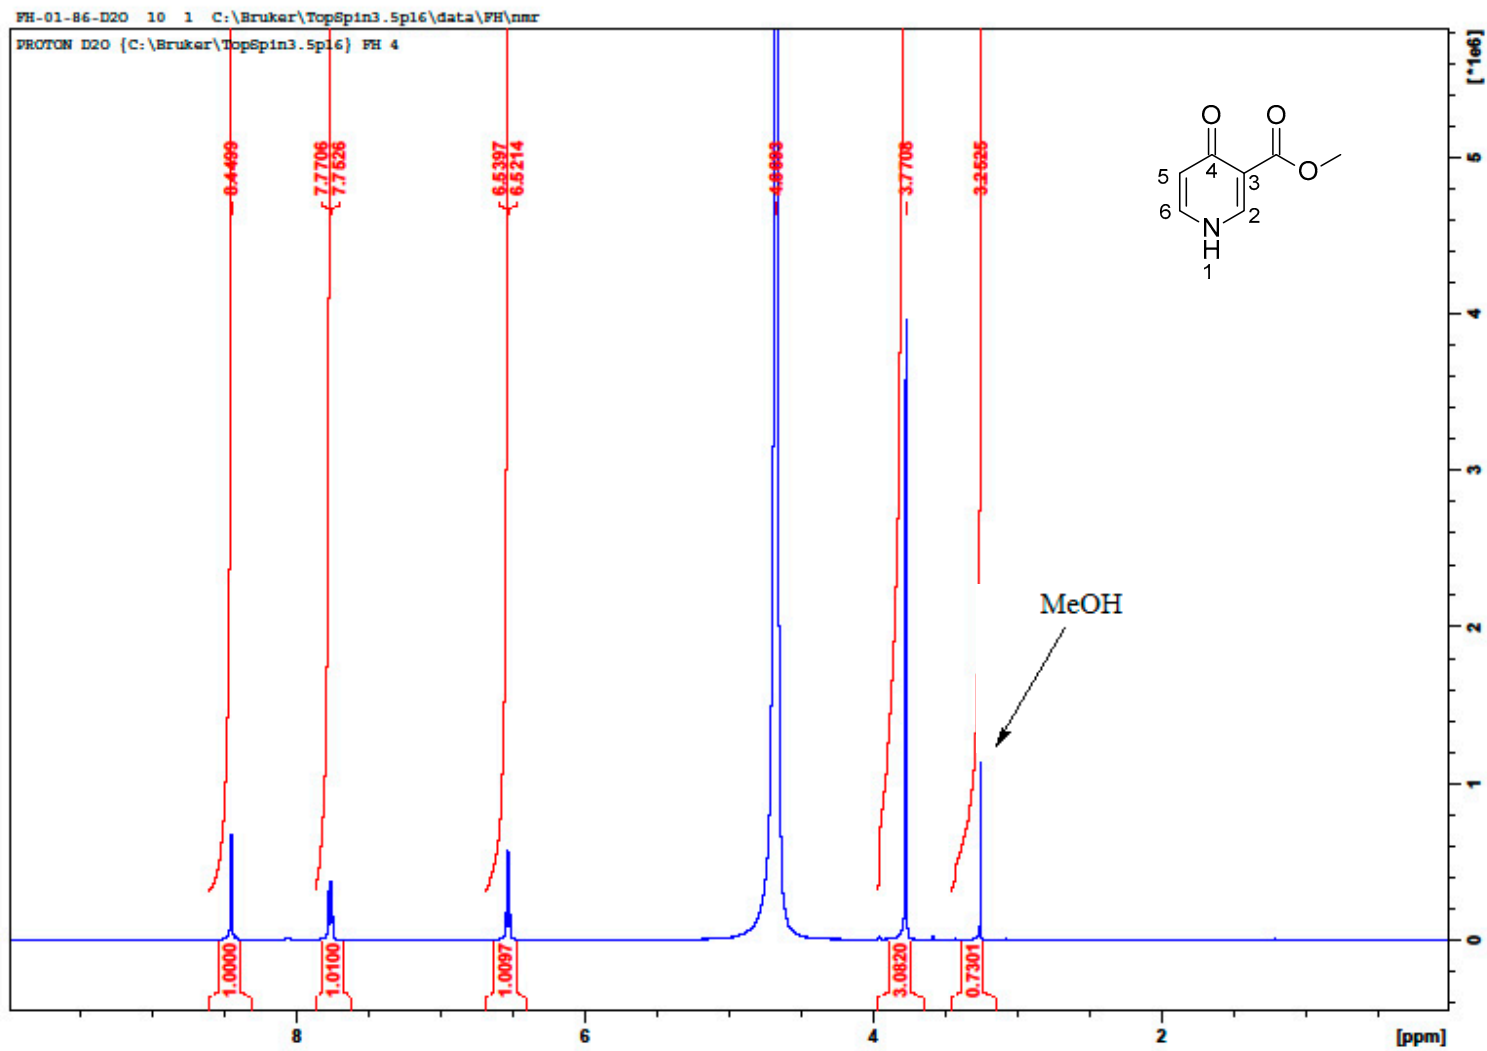

Compound 11. 400 MHz  $^1\text{H}$  NMR spectrum in  $\text{D}_2\text{O}$

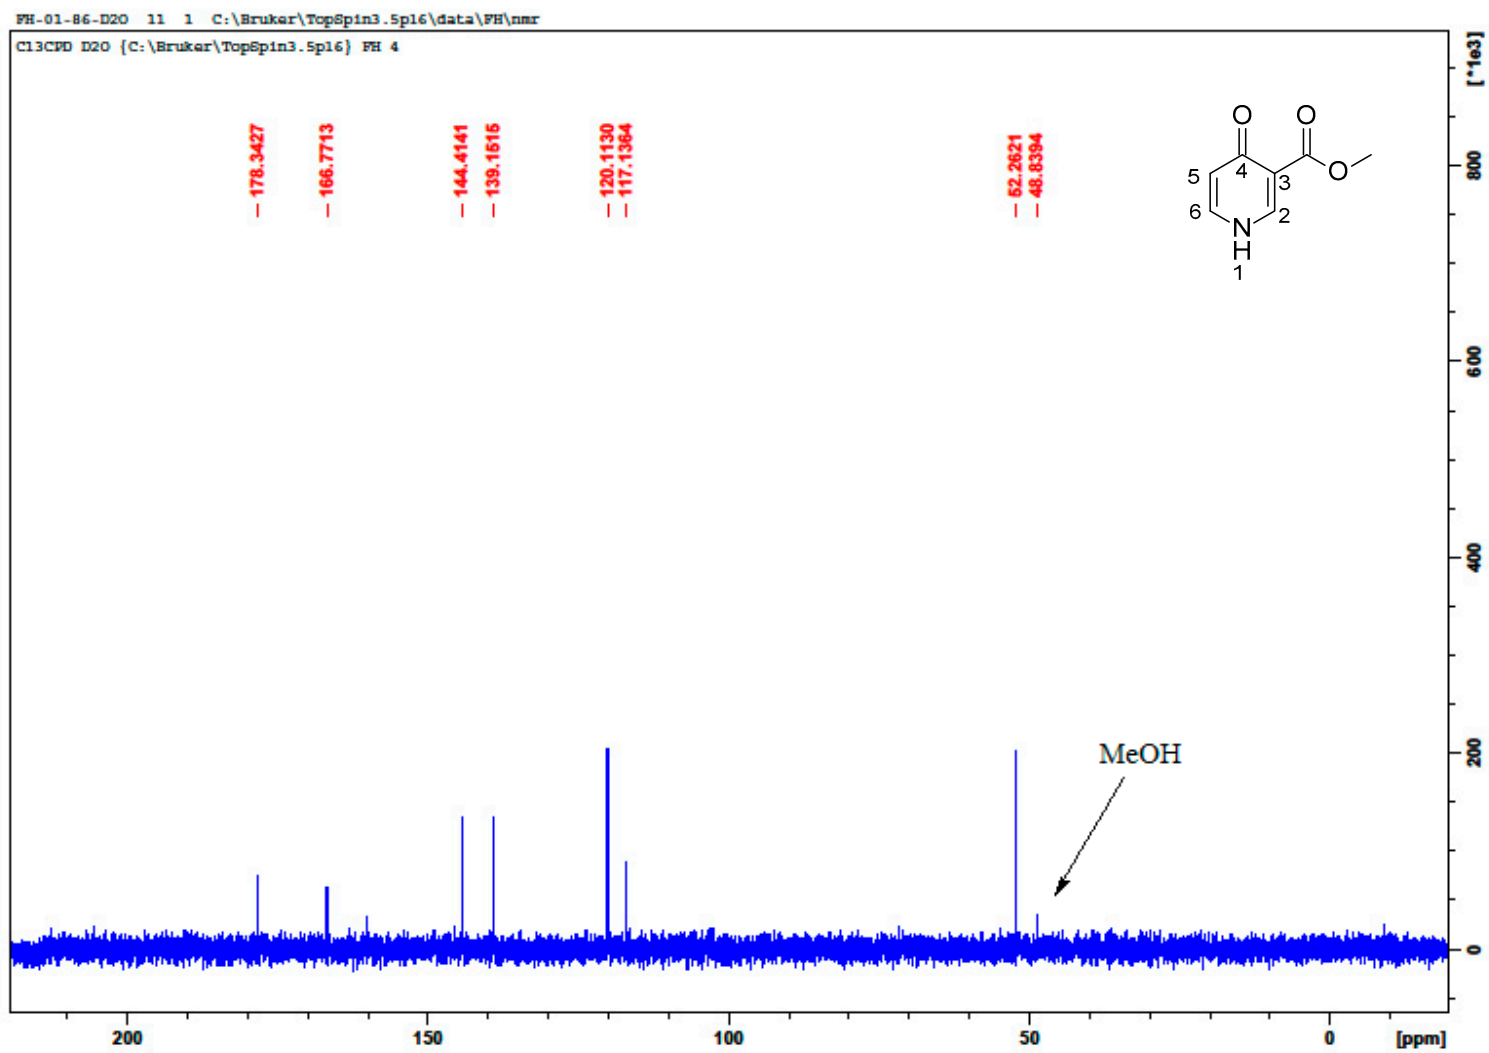

Compound 11. 100 MHz  $^{13}\text{C}$  NMR spectrum in  $\text{D}_2\text{O}$

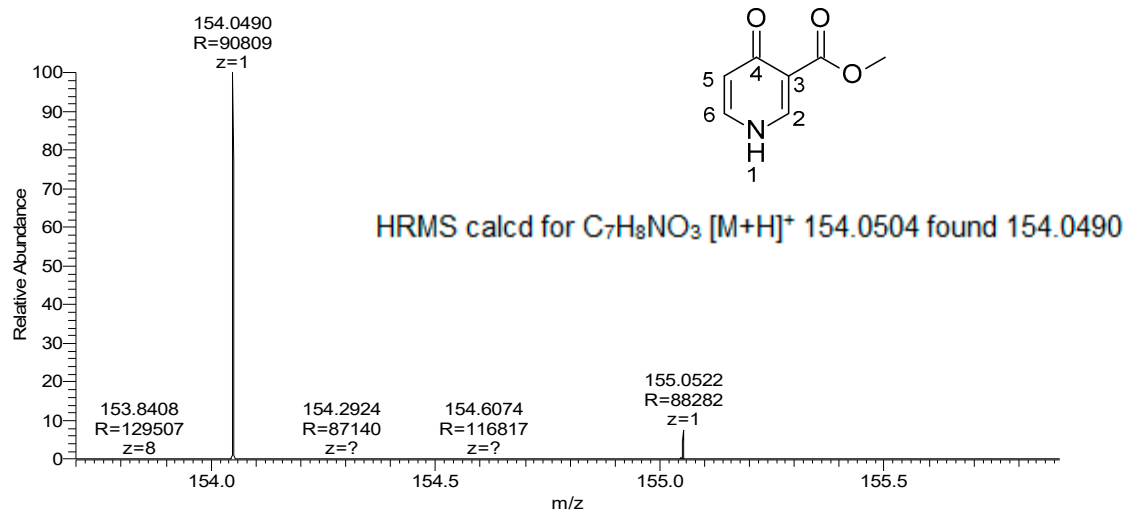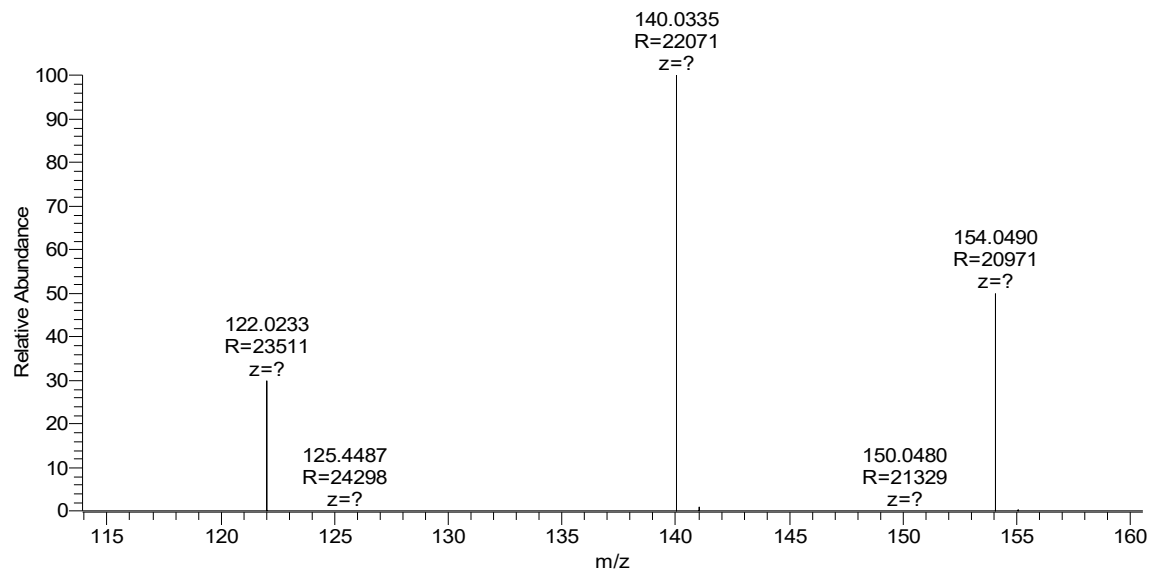

**Compound 11. HRMS and MS/MS spectra**

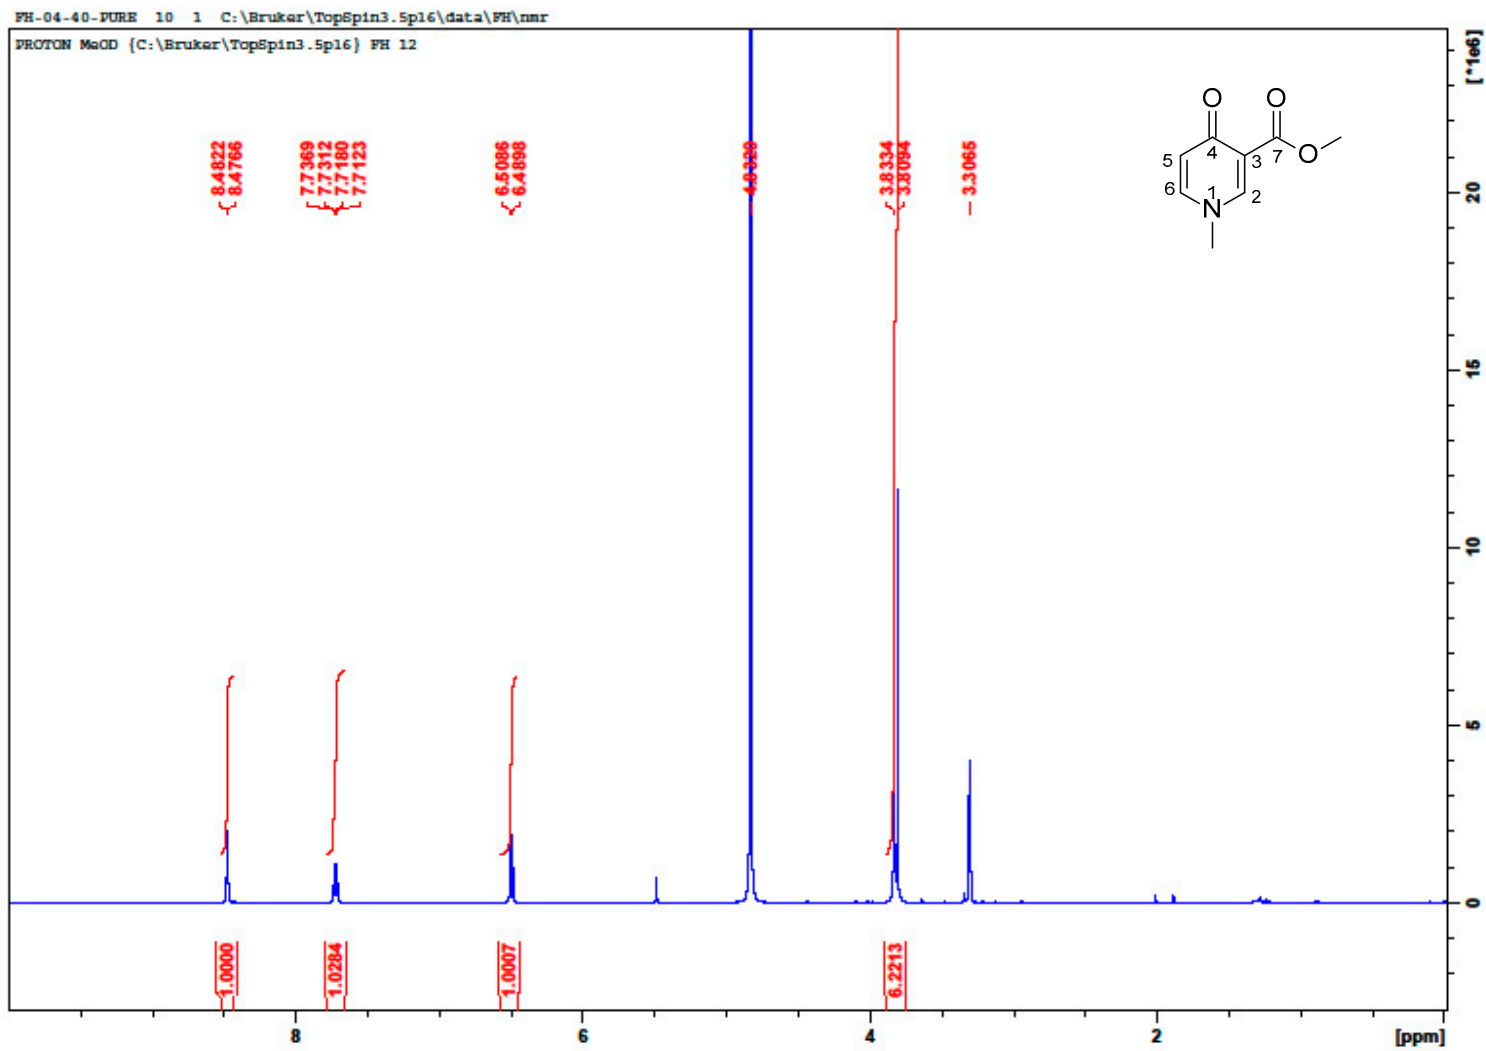

Compound 12. 400 MHz  $^1\text{H}$  NMR spectrum in MeOD

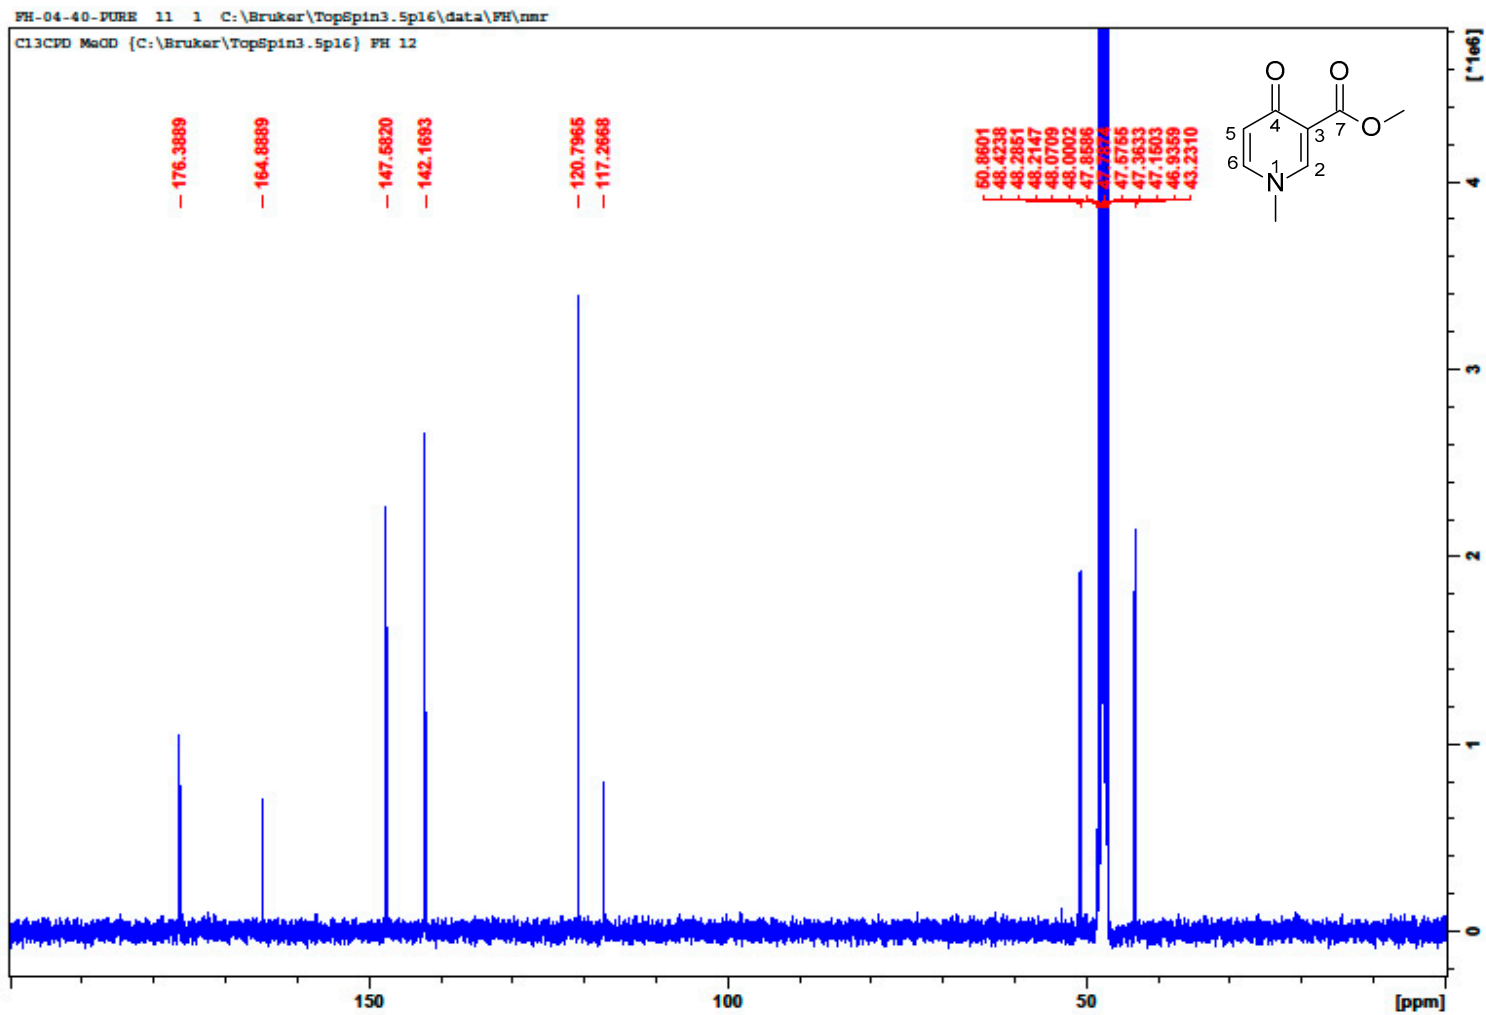

Compound 12. 400 MHz  $^{13}\text{C}$  NMR spectrum in MeOD

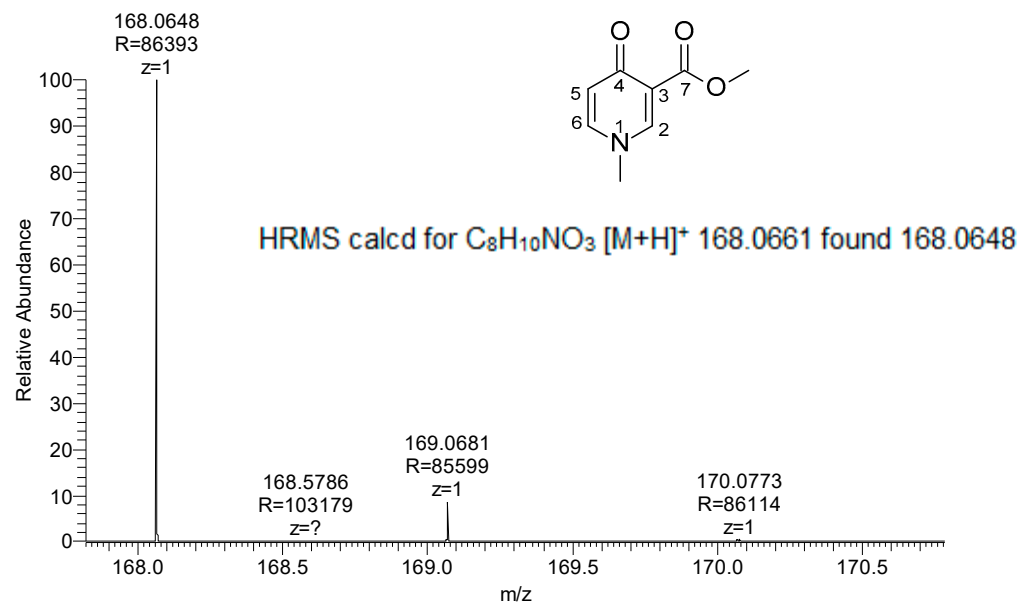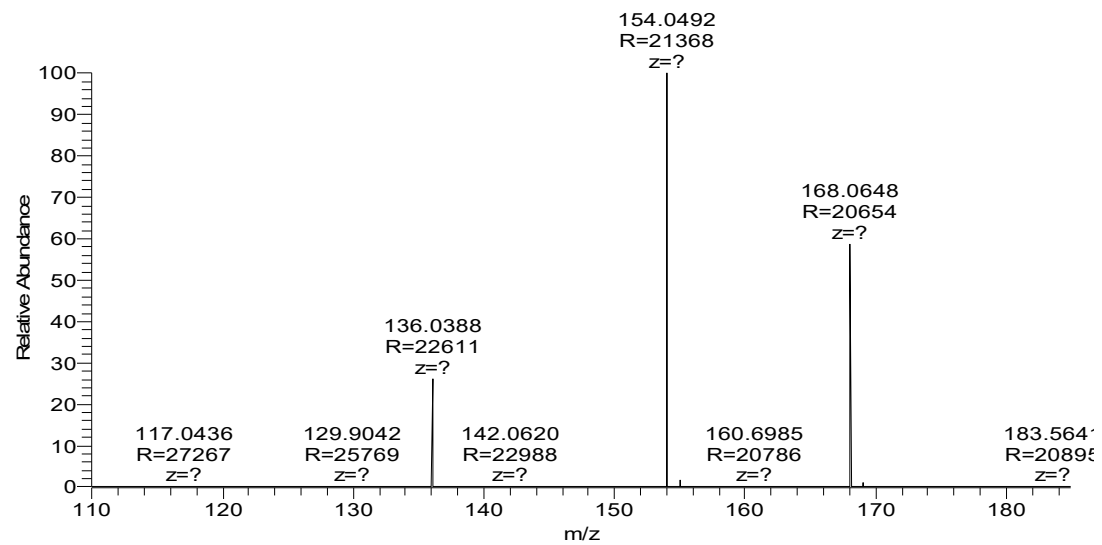

Compound 12. HRMS and MS/MS spectra

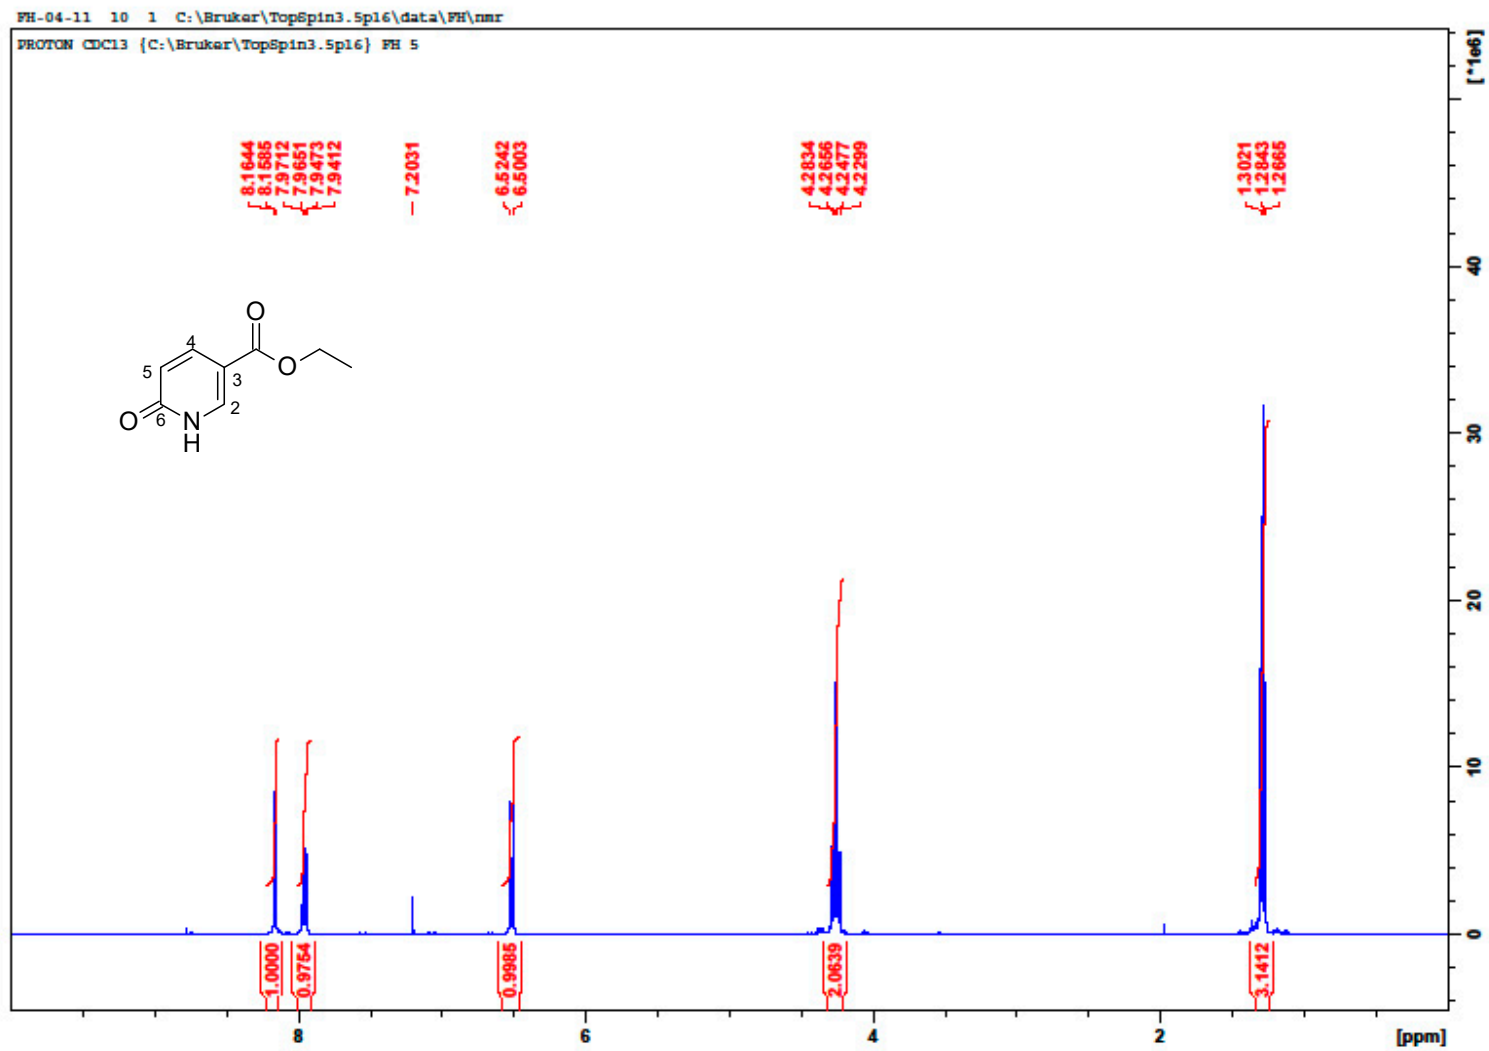

Compound 14. 400 MHz  $^1\text{H}$  NMR spectrum in  $\text{CDCl}_3$



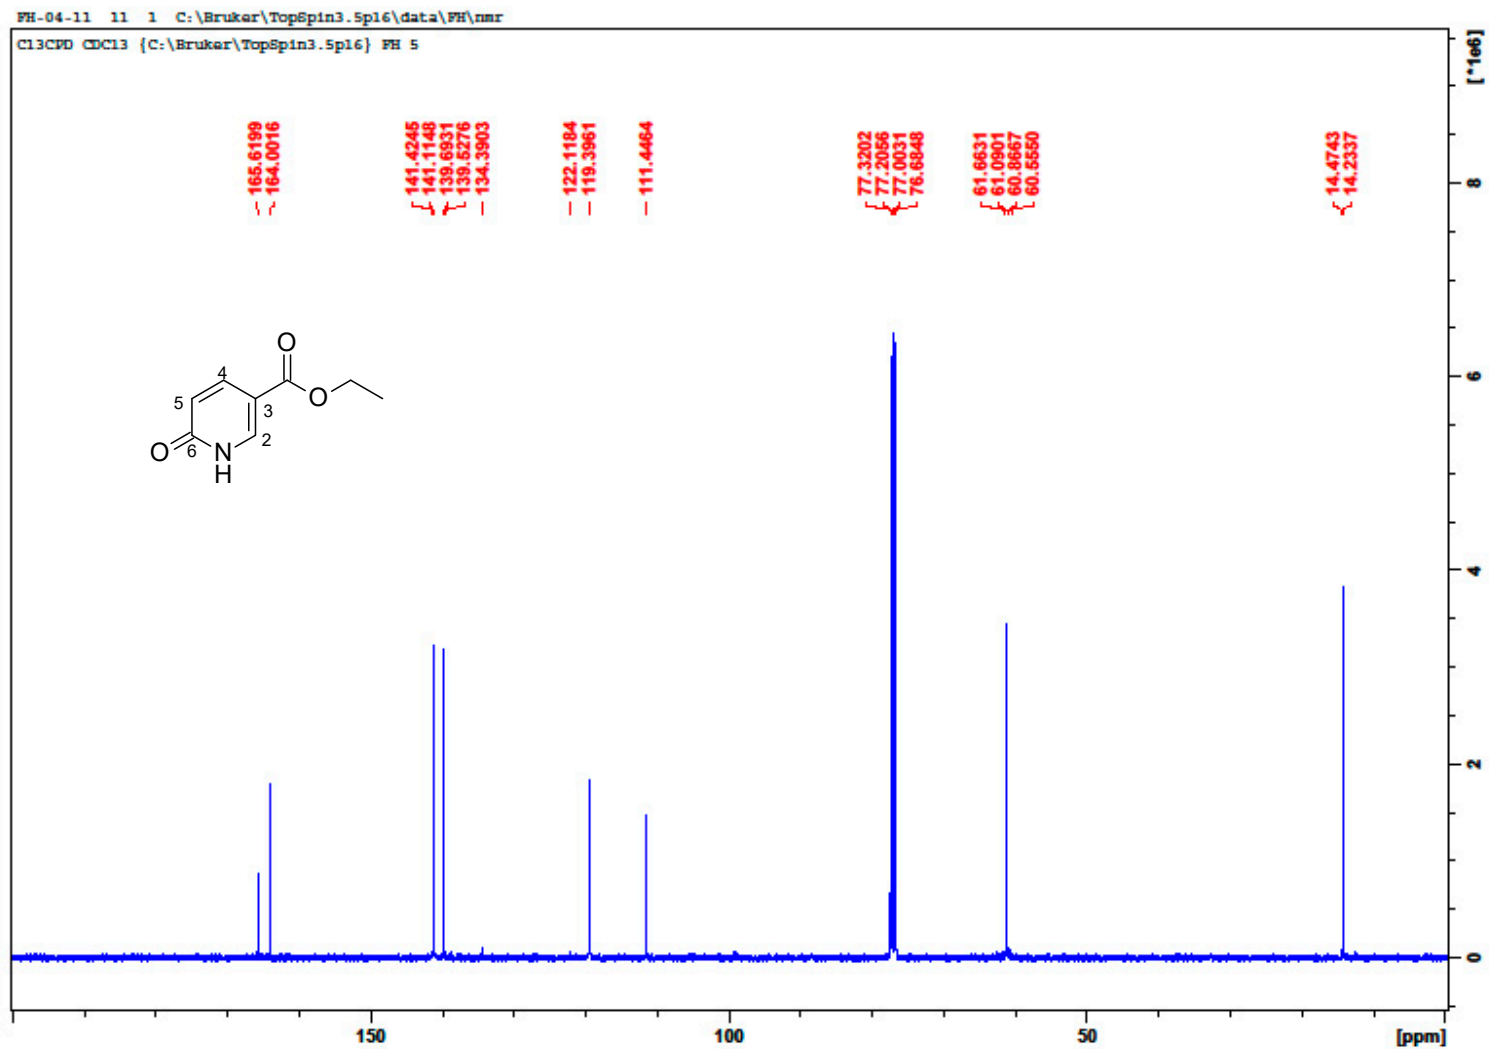

Compound 14. 400 MHz  $^{13}\text{C}$  NMR spectrum in  $\text{CDCl}_3$

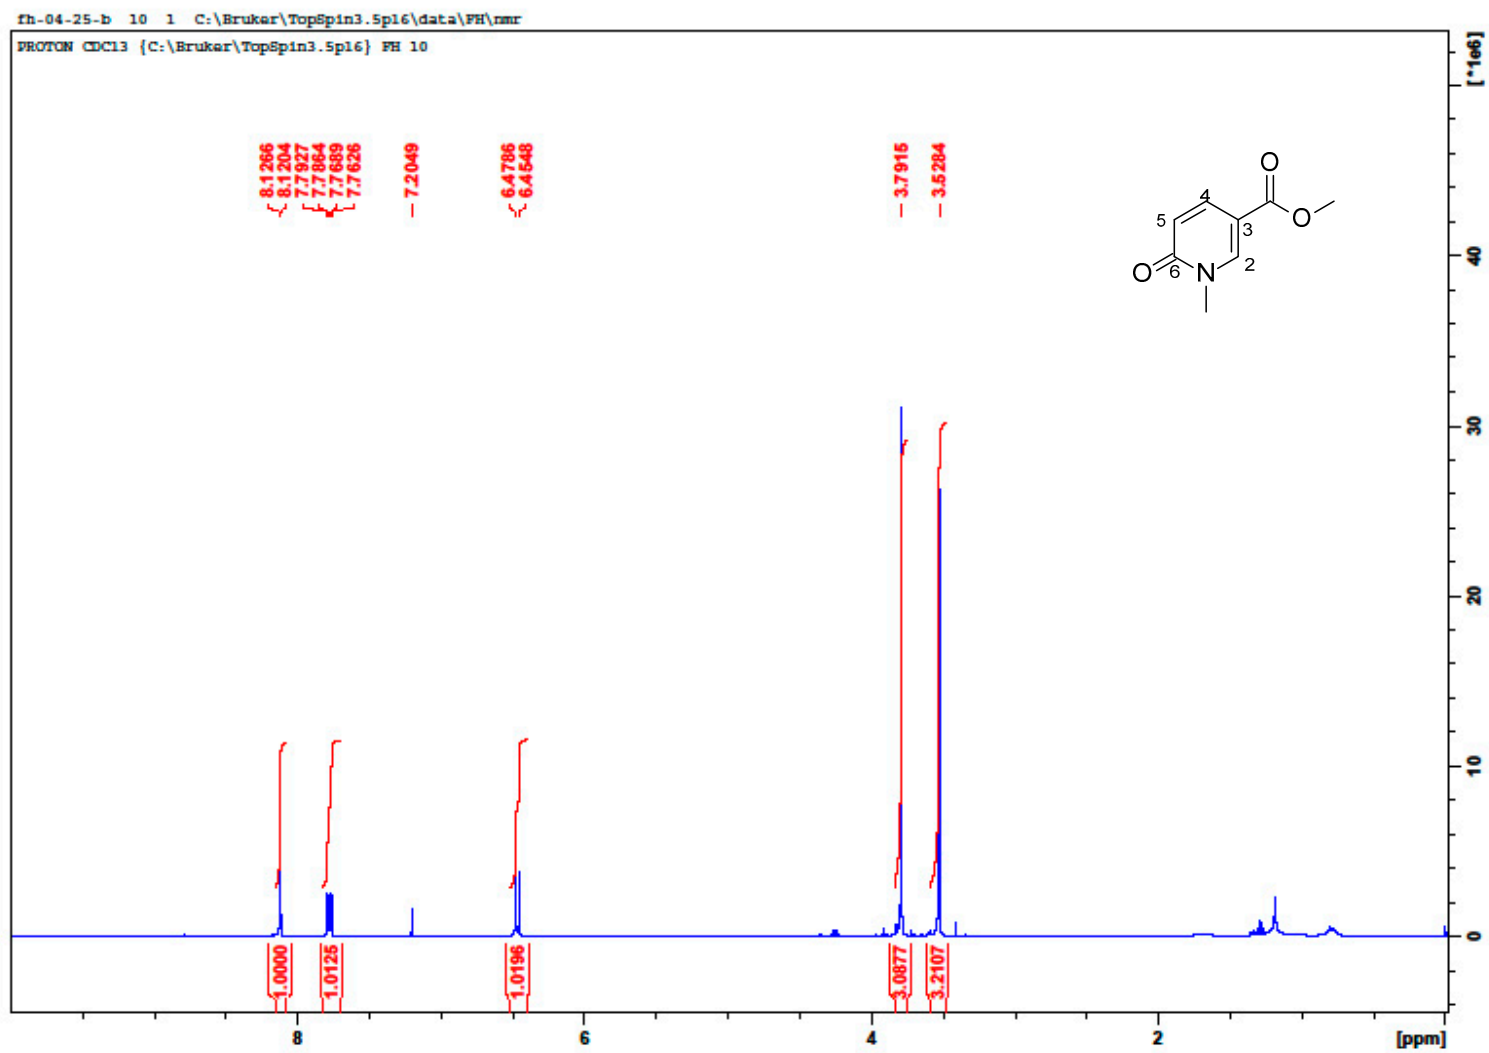

Compound 15. 400 MHz  $^1\text{H}$  NMR spectrum in  $\text{CDCl}_3$

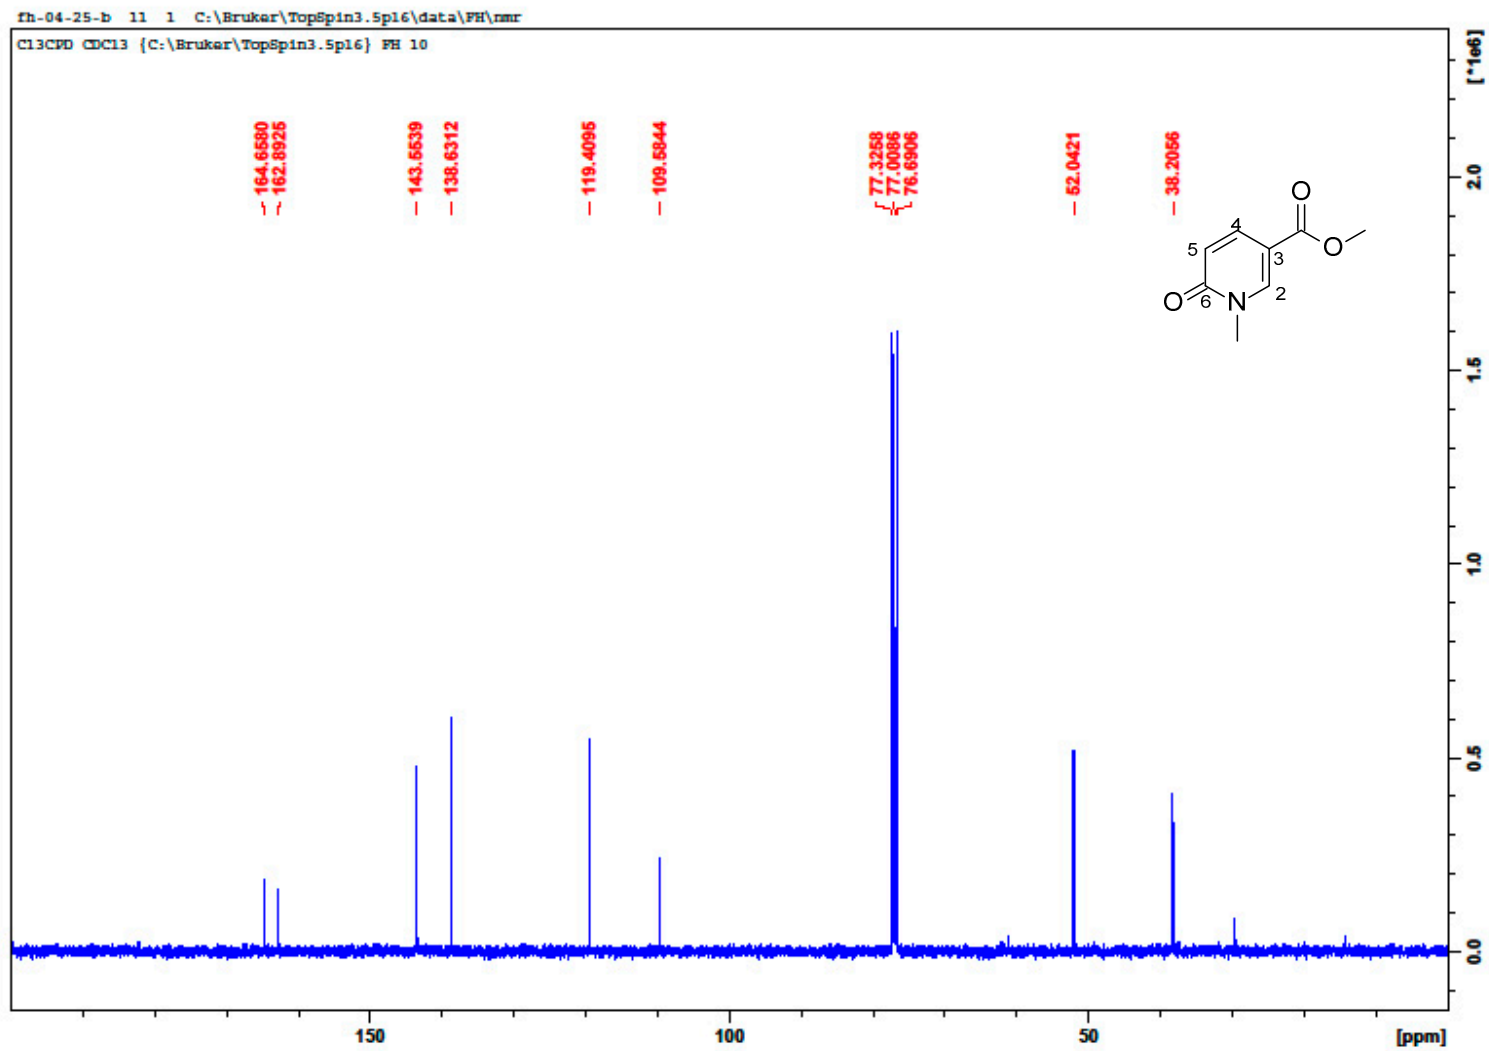

Compound 15. 400 MHz  $^{13}\text{C}$  NMR spectrum in  $\text{CDCl}_3$

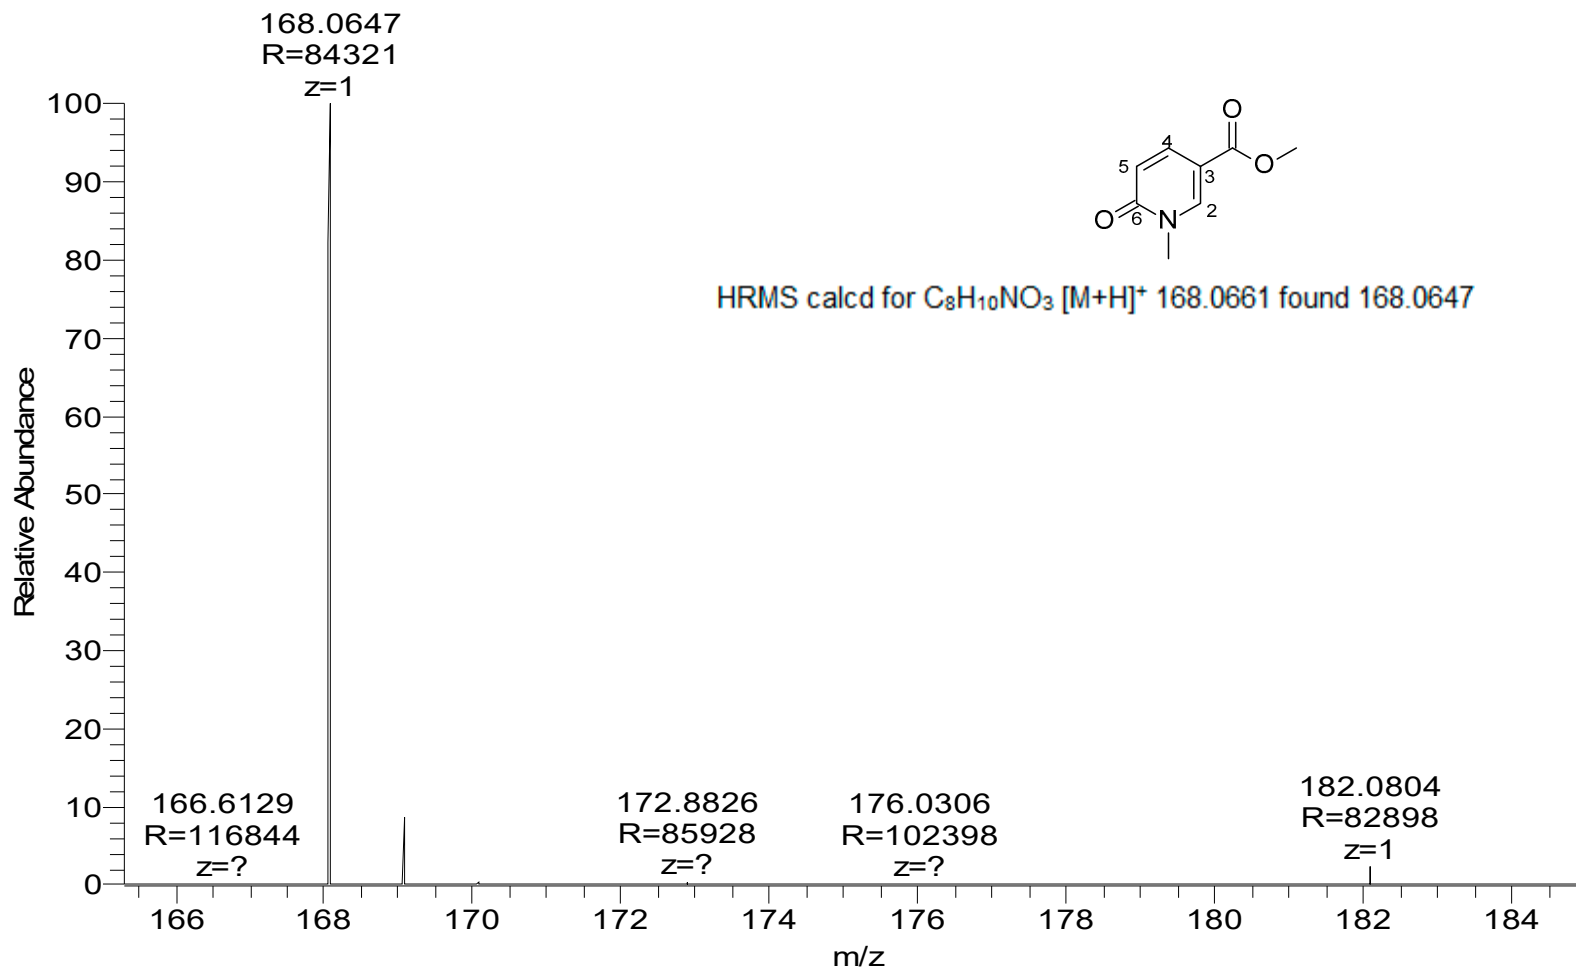

Compound 15. HRMS spectra

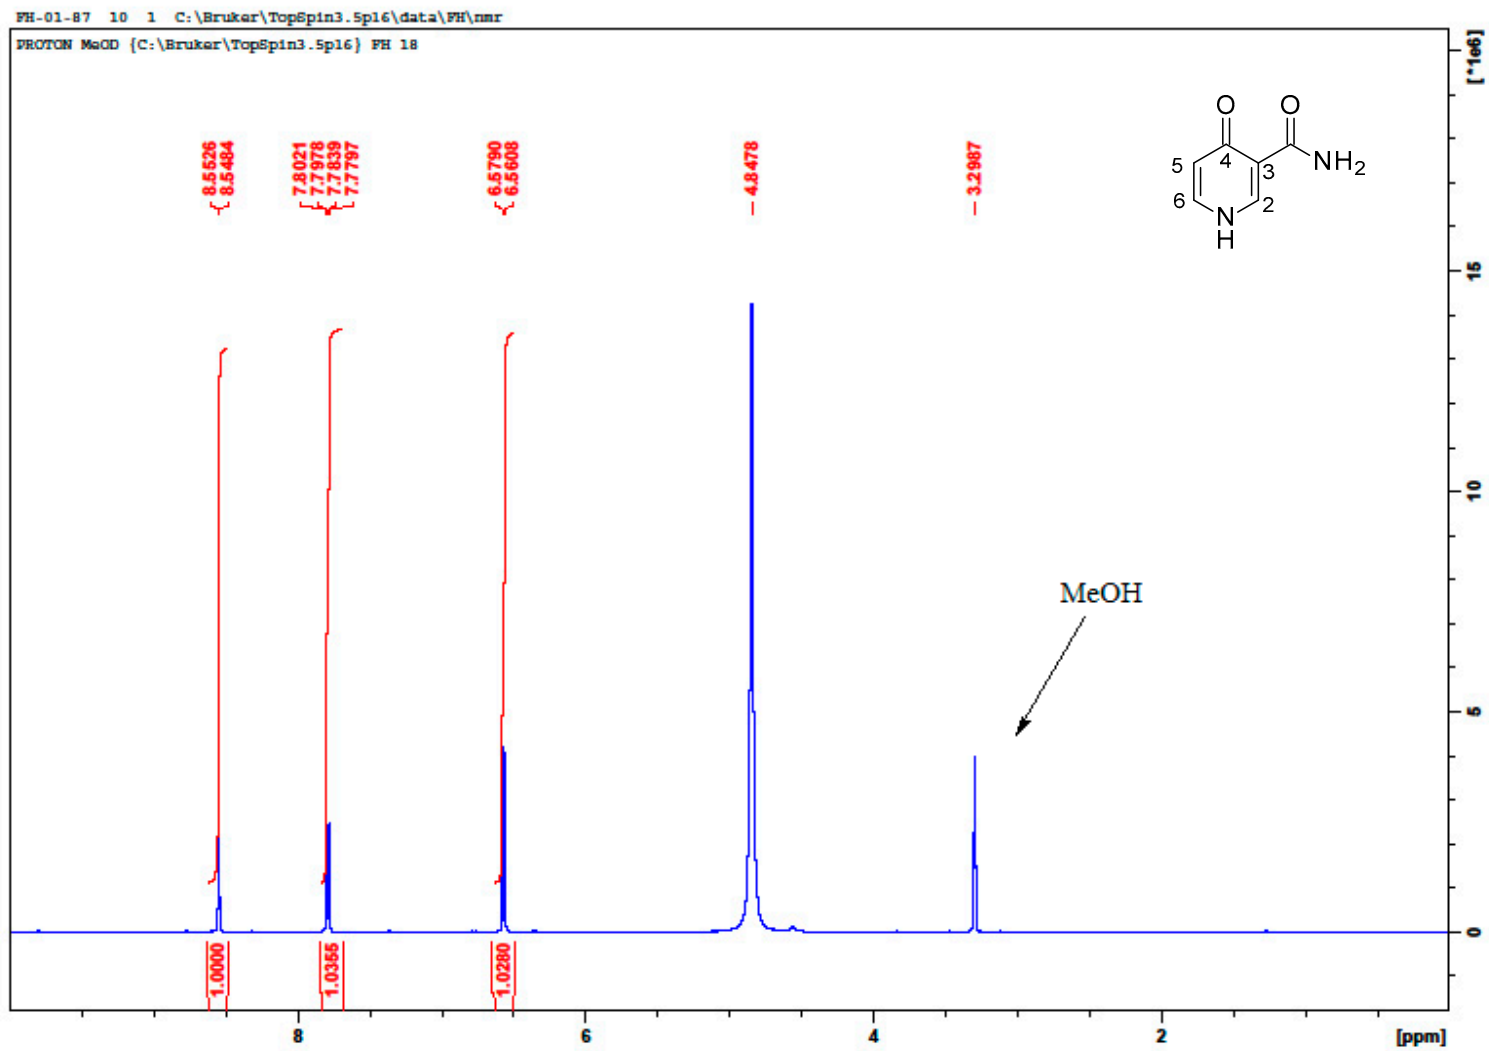

Compound 16. 400 MHz  $^1\text{H}$  NMR spectrum in MeOD

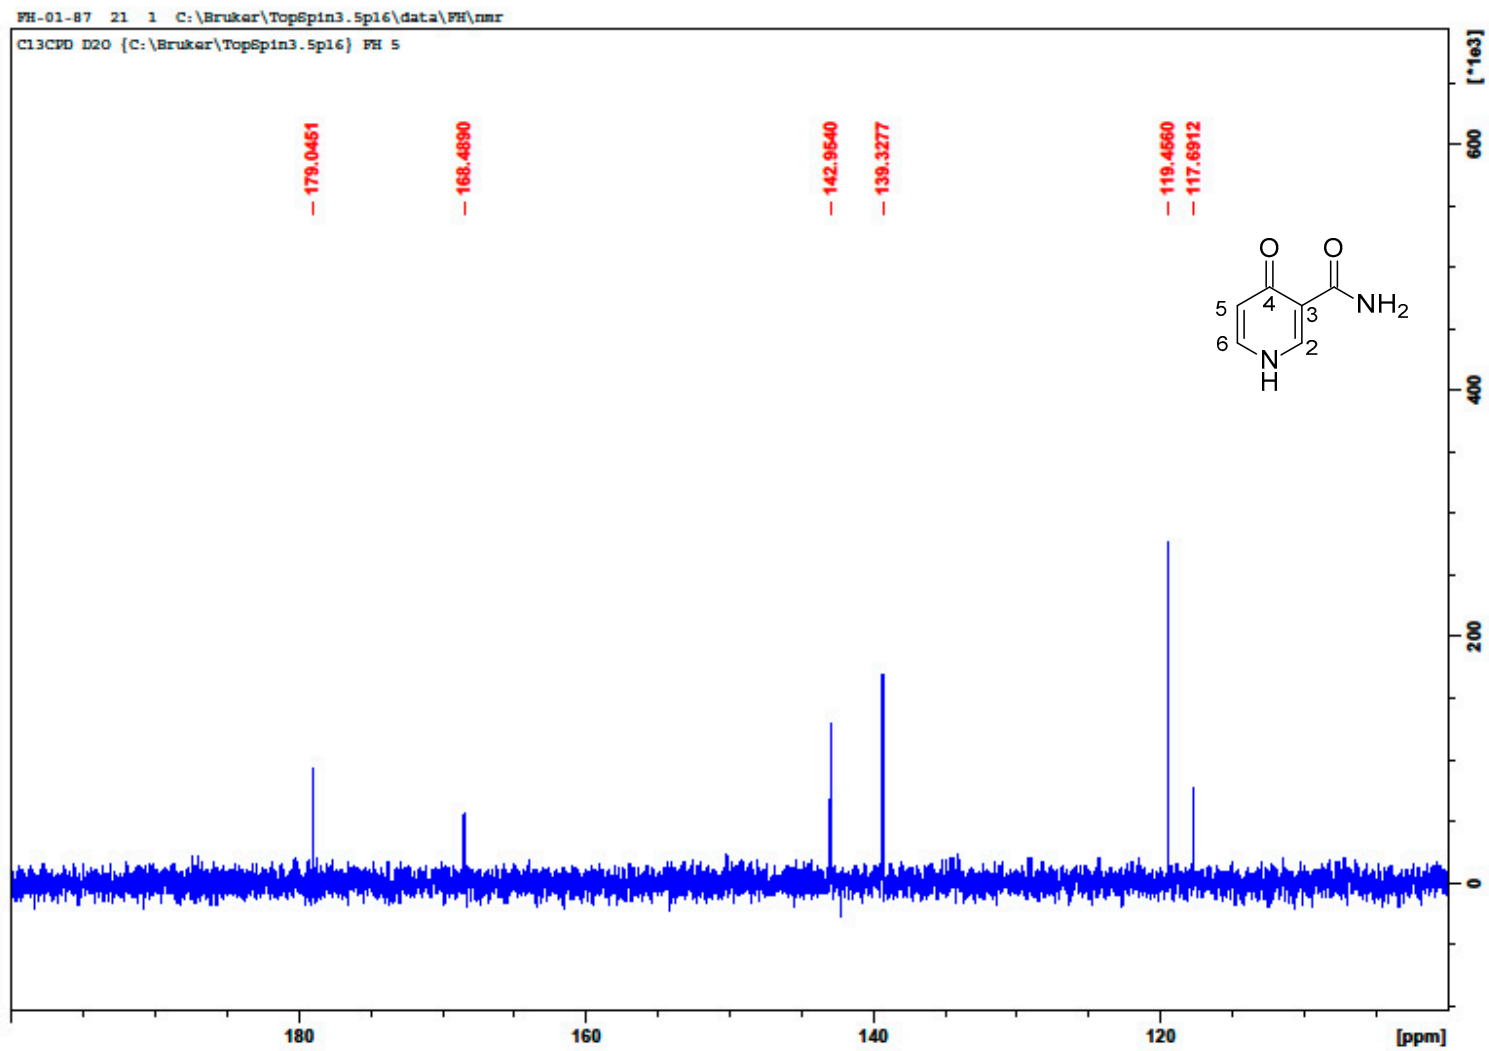

Compound 16. 100 MHz  $^{13}\text{C}$  NMR spectrum in MeOD

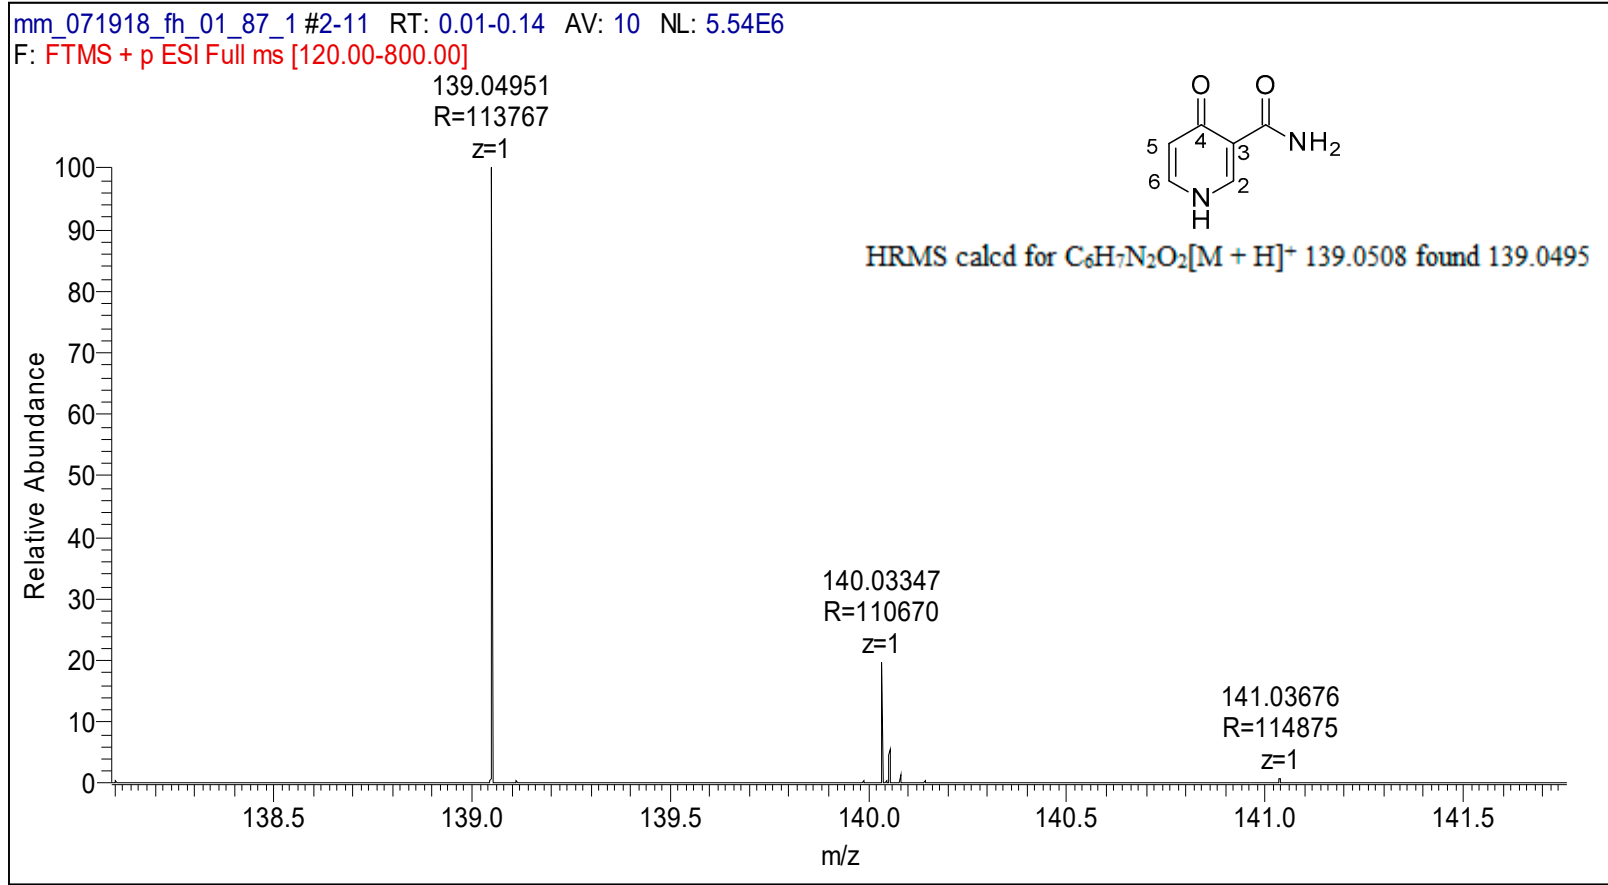

**Compound 16. HRMS spectra**

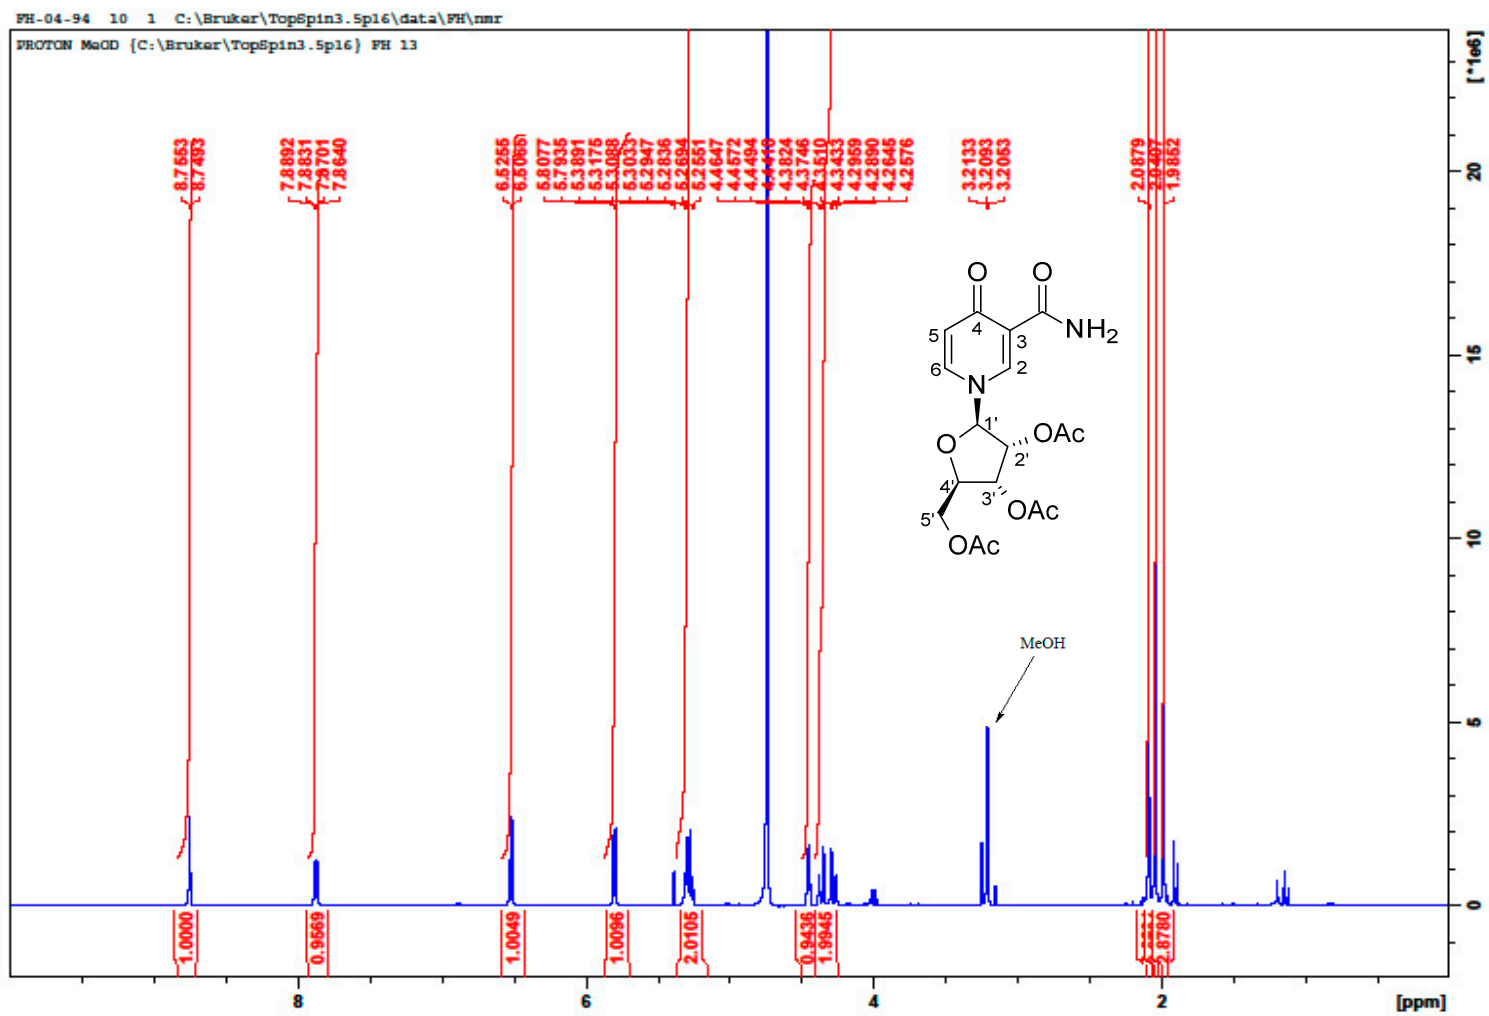

Compound 18. 400 MHz <sup>1</sup>H NMR spectrum in MeOD



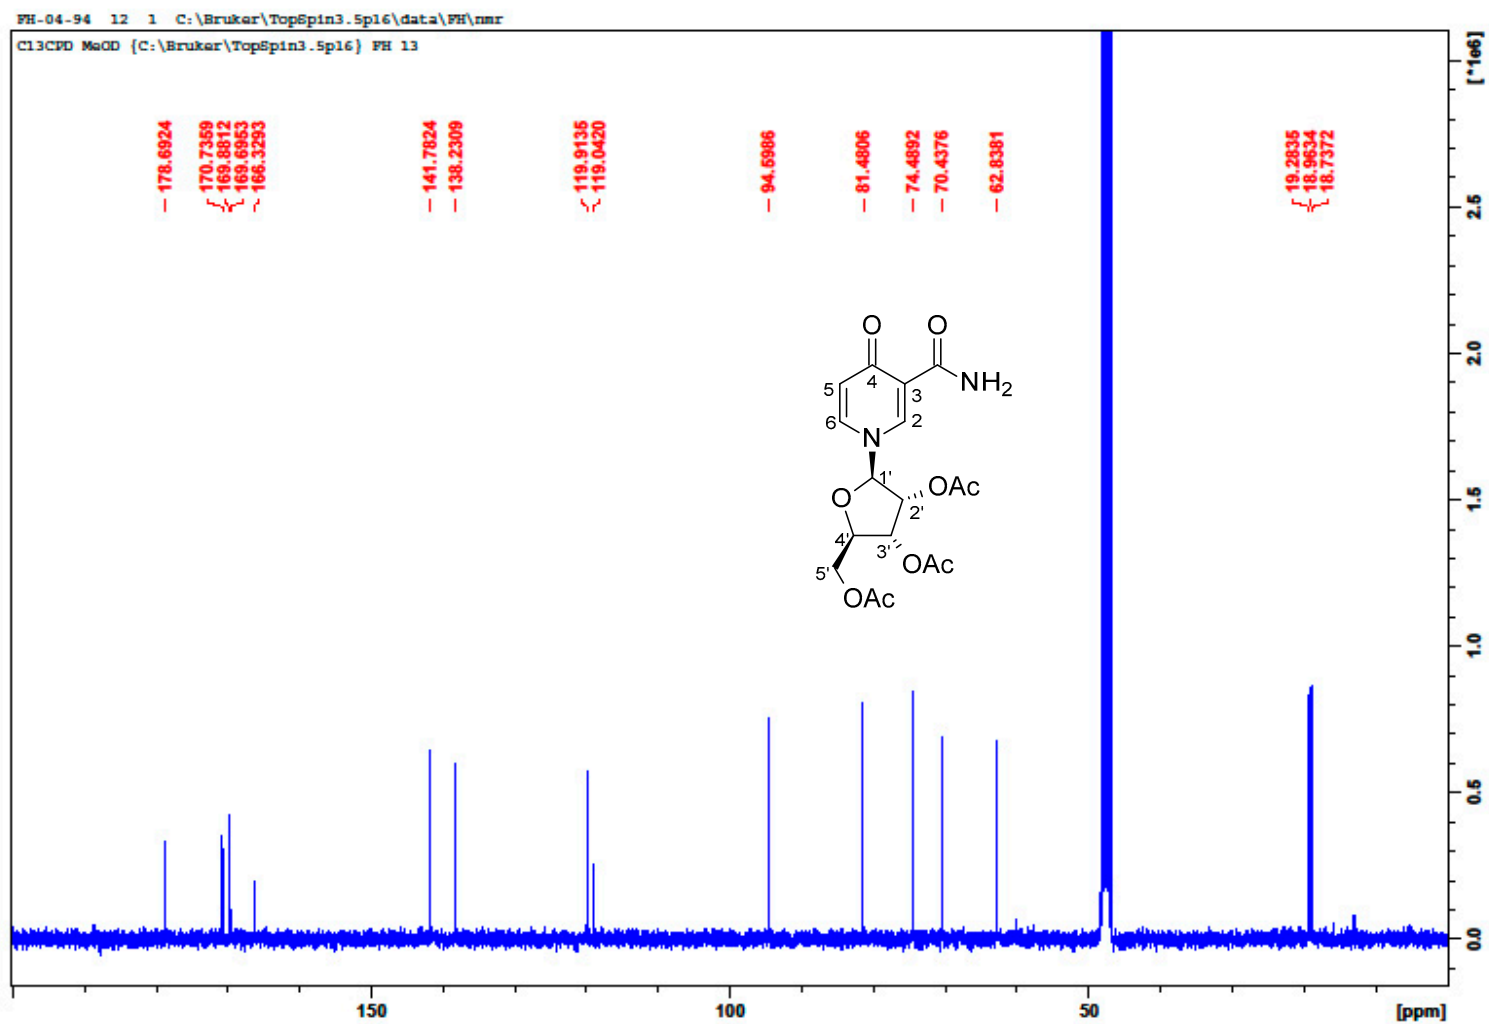

Compound 18. 100 MHz  $^{13}\text{C}$  NMR spectrum in MeOD

mm\_071918\_fh\_01\_94\_1 #1-12 RT: 0.01-0.16 AV: 12 NL: 2.43E7

F: FTMS + p ESI Full ms [120.00-800.00]

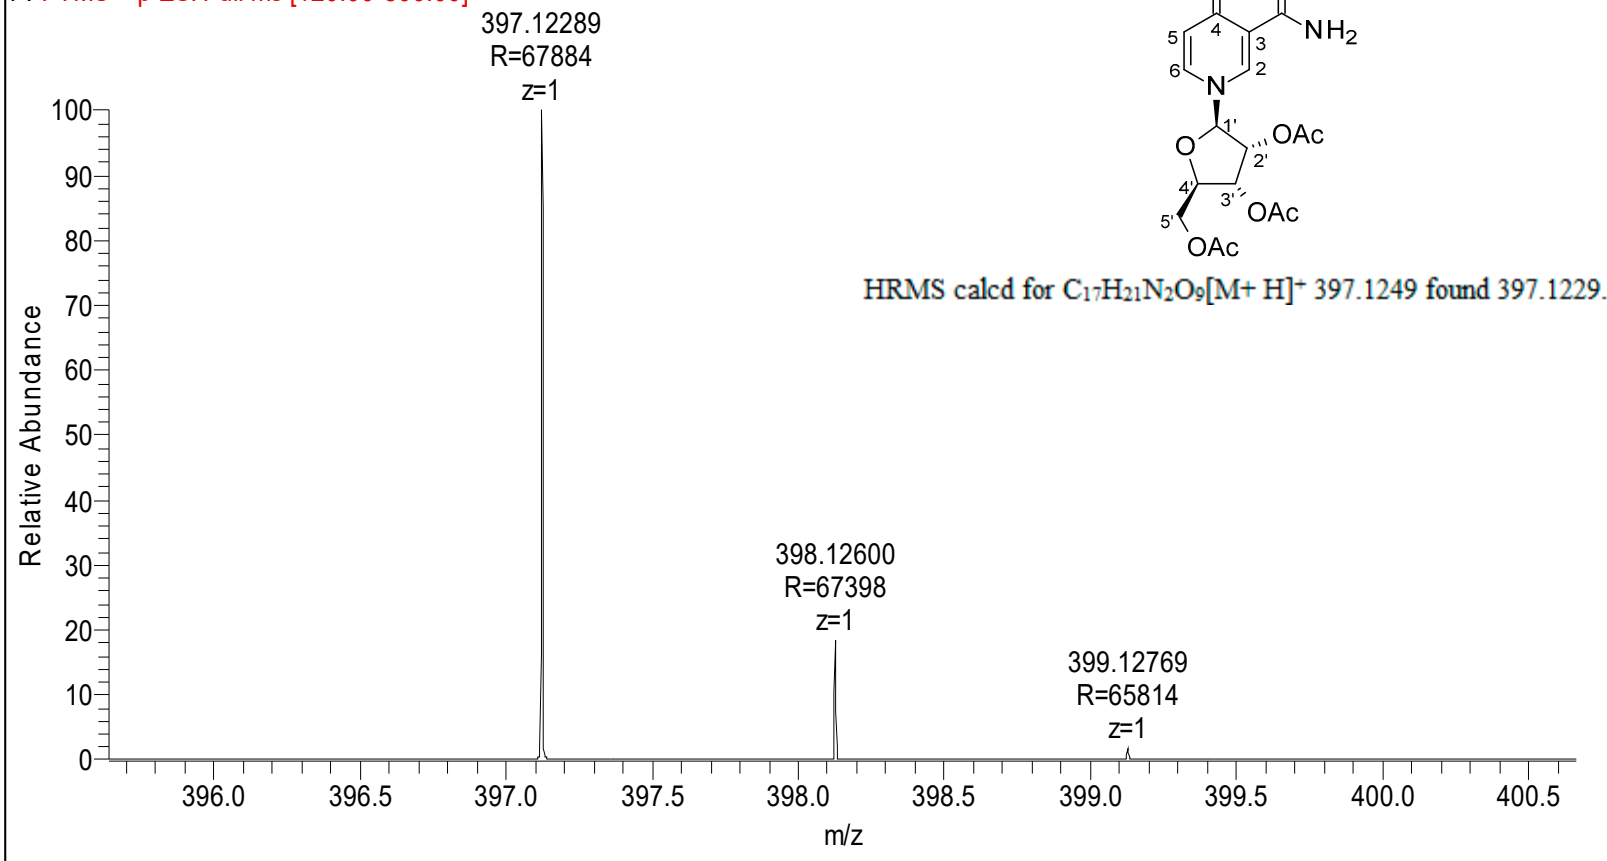

Compound 18. HRMS spectra

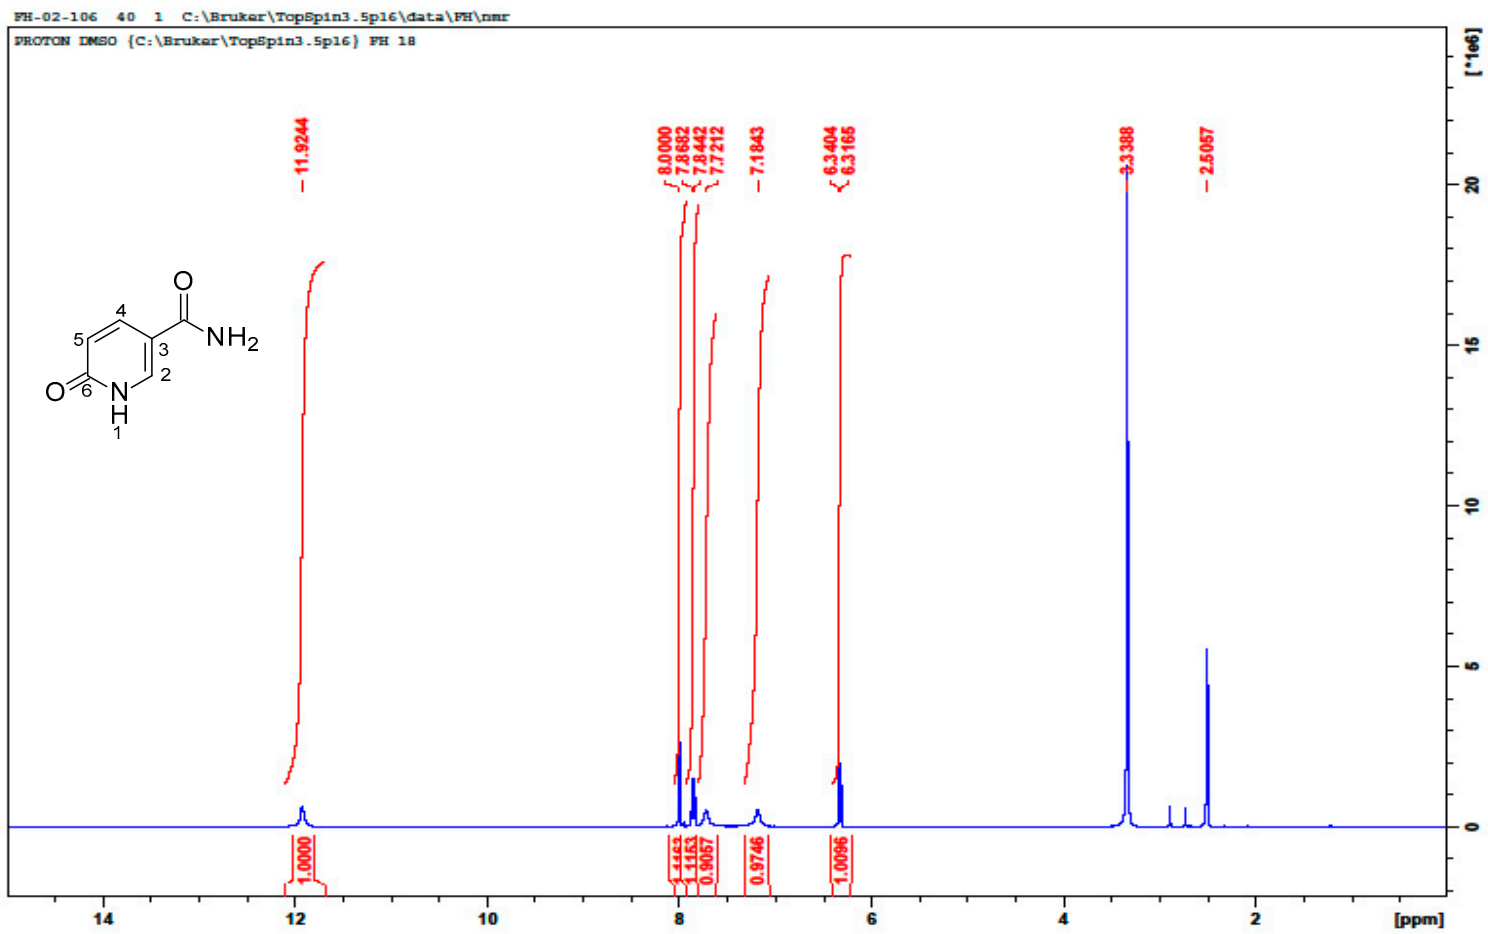

Compound 20. 400 MHz <sup>1</sup>H NMR spectrum in DMSO

mm\_081319\_2py\_100um\_1 #391-441 RT: 3.90-4.34 AV: 14 NL: 3.38E6  
F: FTMS + p ESI Full ms [100.00-500.00]

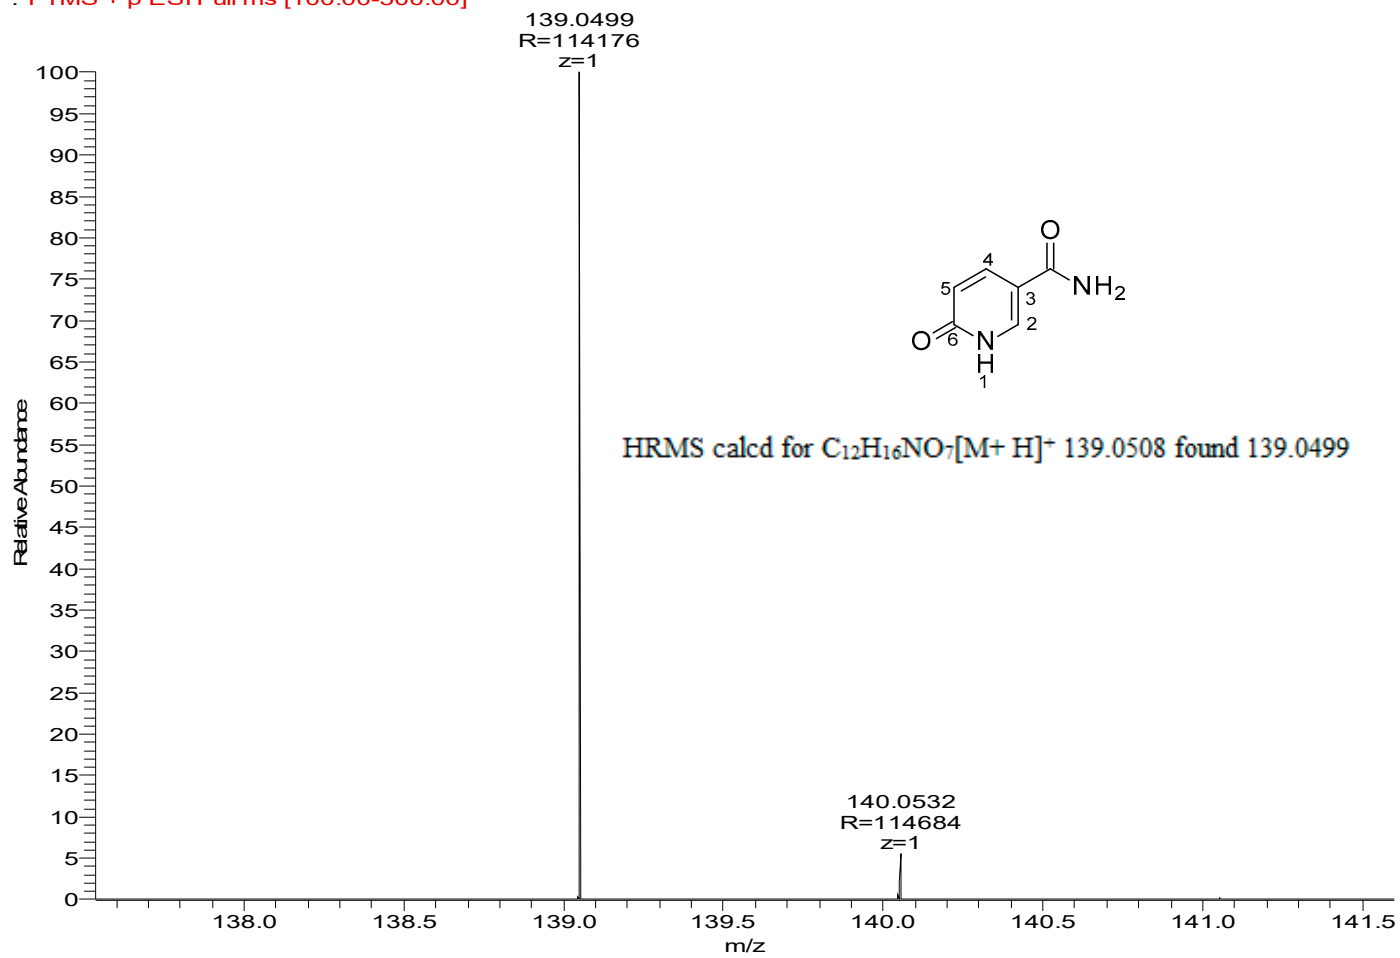

Compound 20. HRMS spectra

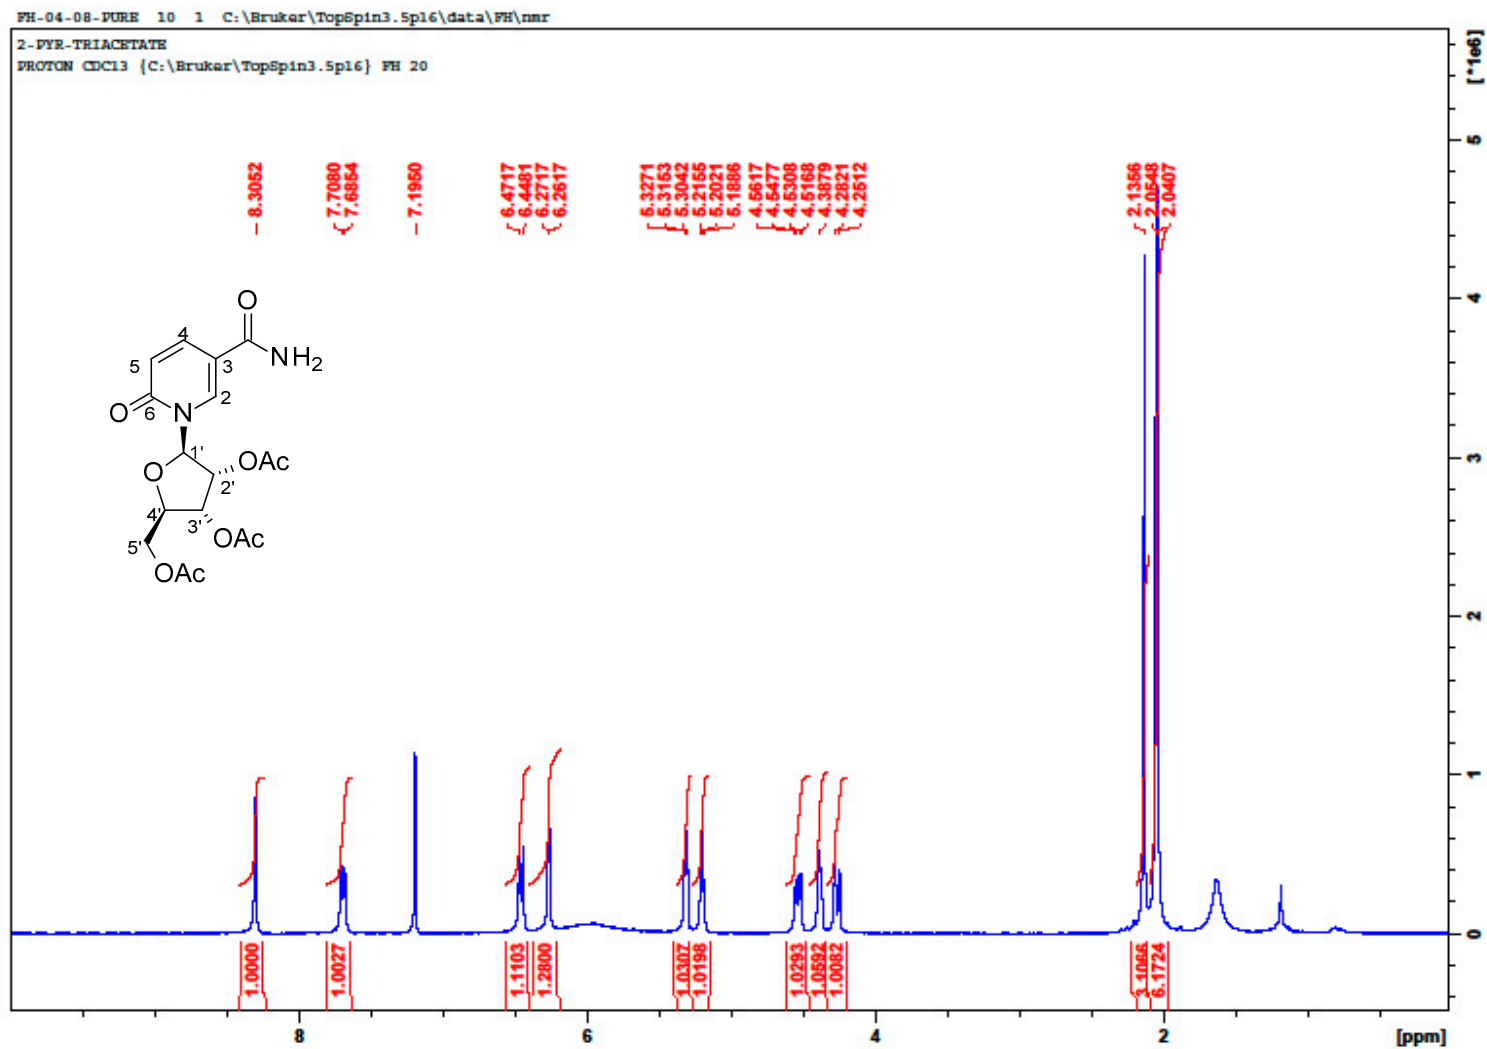

Compound 22. 400 MHz <sup>1</sup>H NMR spectrum in CDCl<sub>3</sub>

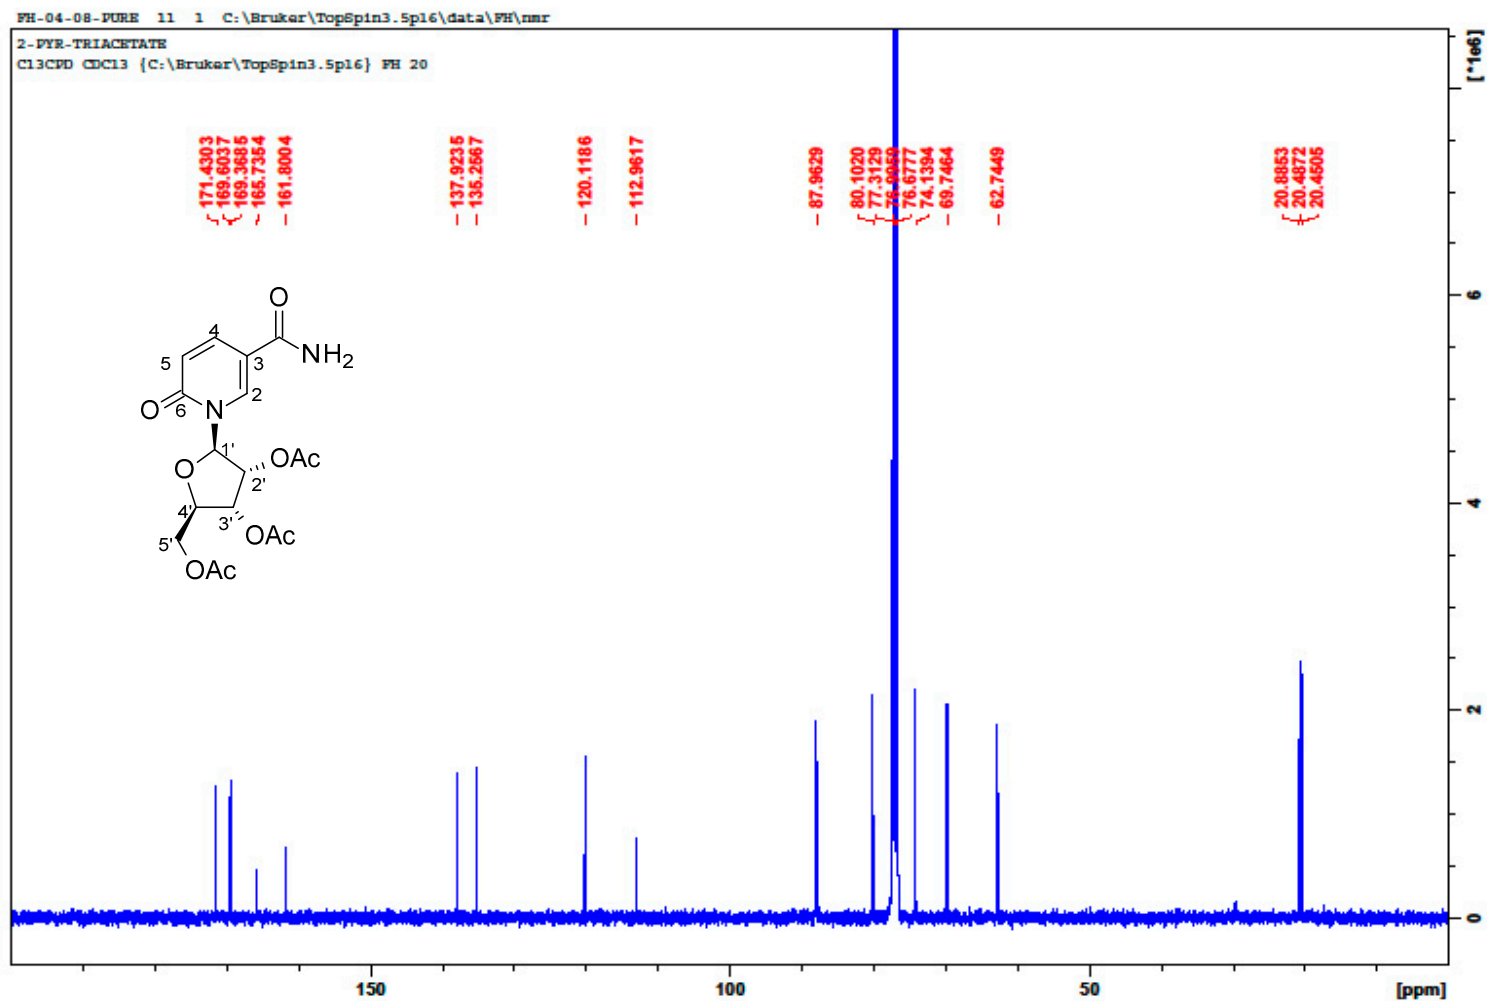

Compound 22. 400 MHz  $^{13}\text{C}$  NMR spectrum in  $\text{CDCl}_3$

mm\_092920\_6\_py\_tri\_acetate\_04 #11-48 RT: 0.09-0.41 AV: 38 NL: 7.78E5  
T: {0,0} + p ESI!corona sid=75.00 det=918.00 Full ms [100.00-600.00]

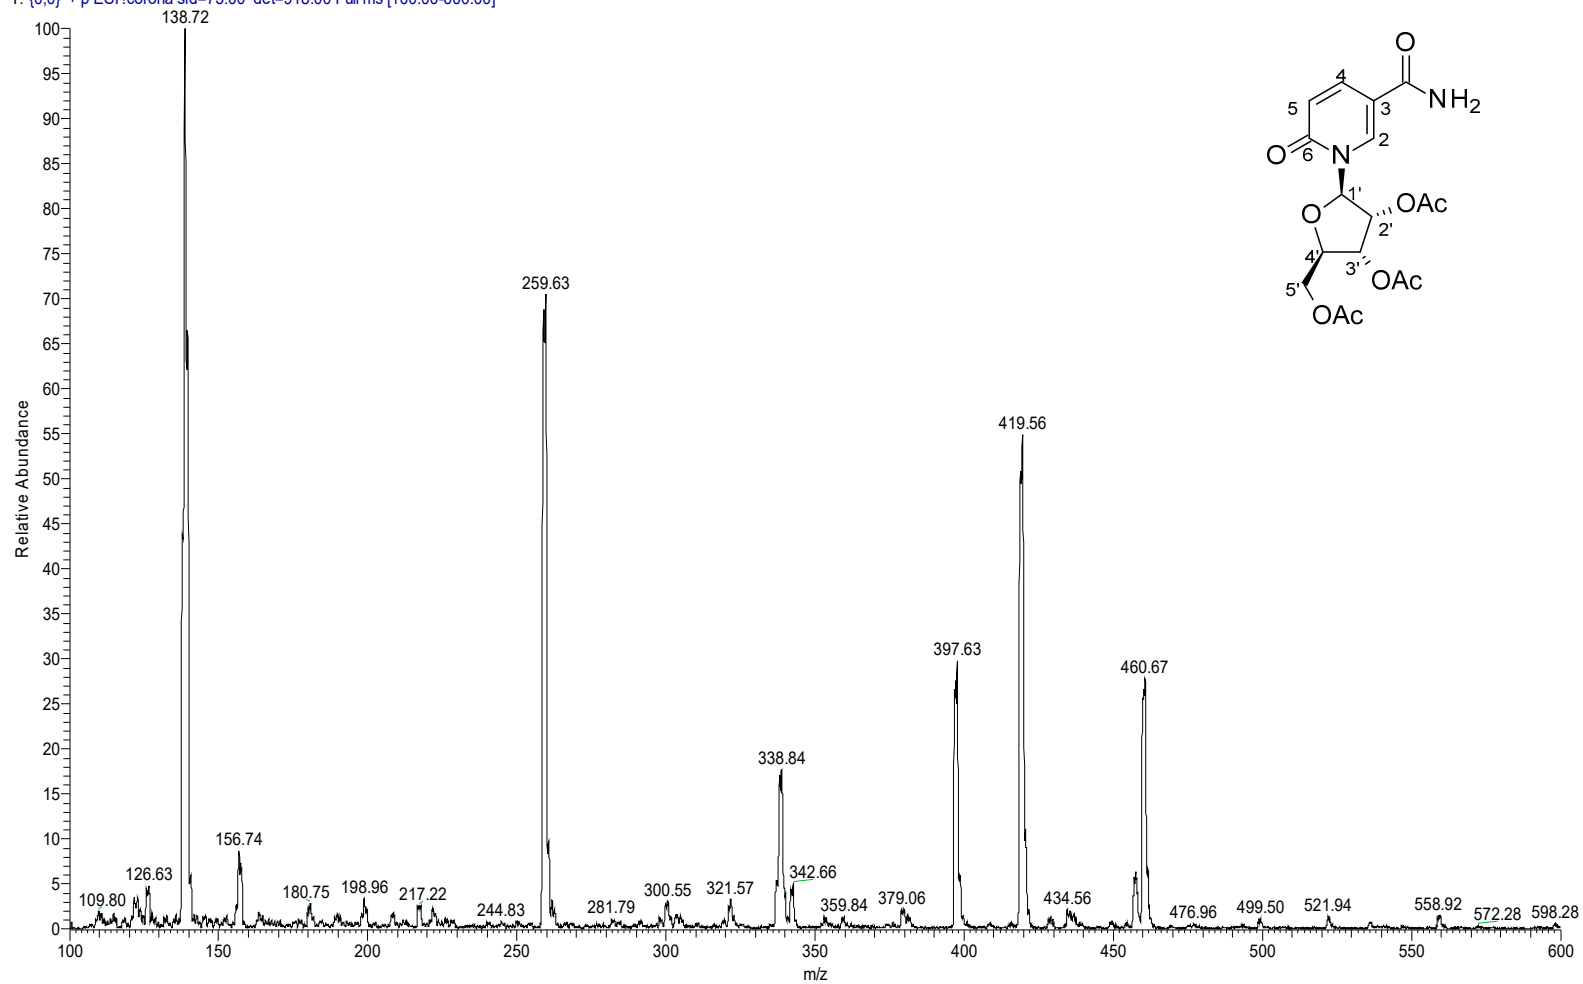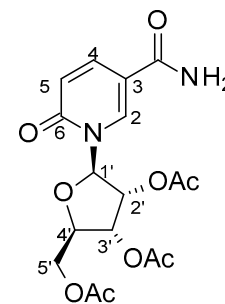

Compound 22. (ES)MS spectra

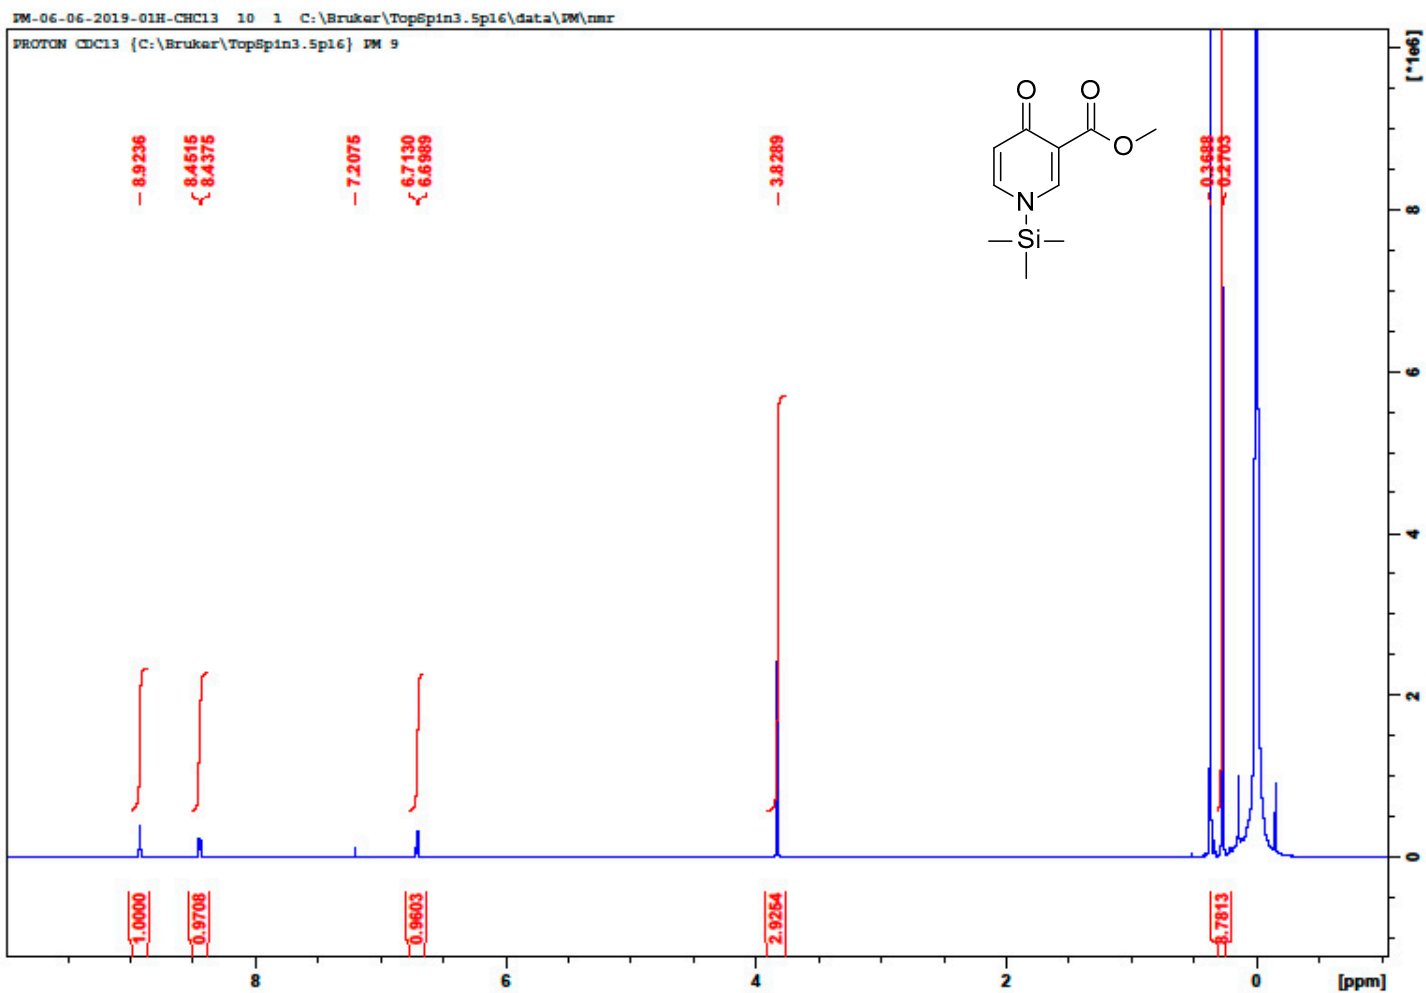

Compound 23. 400 MHz  $^1\text{H}$  NMR spectrum in  $\text{CDCl}_3$



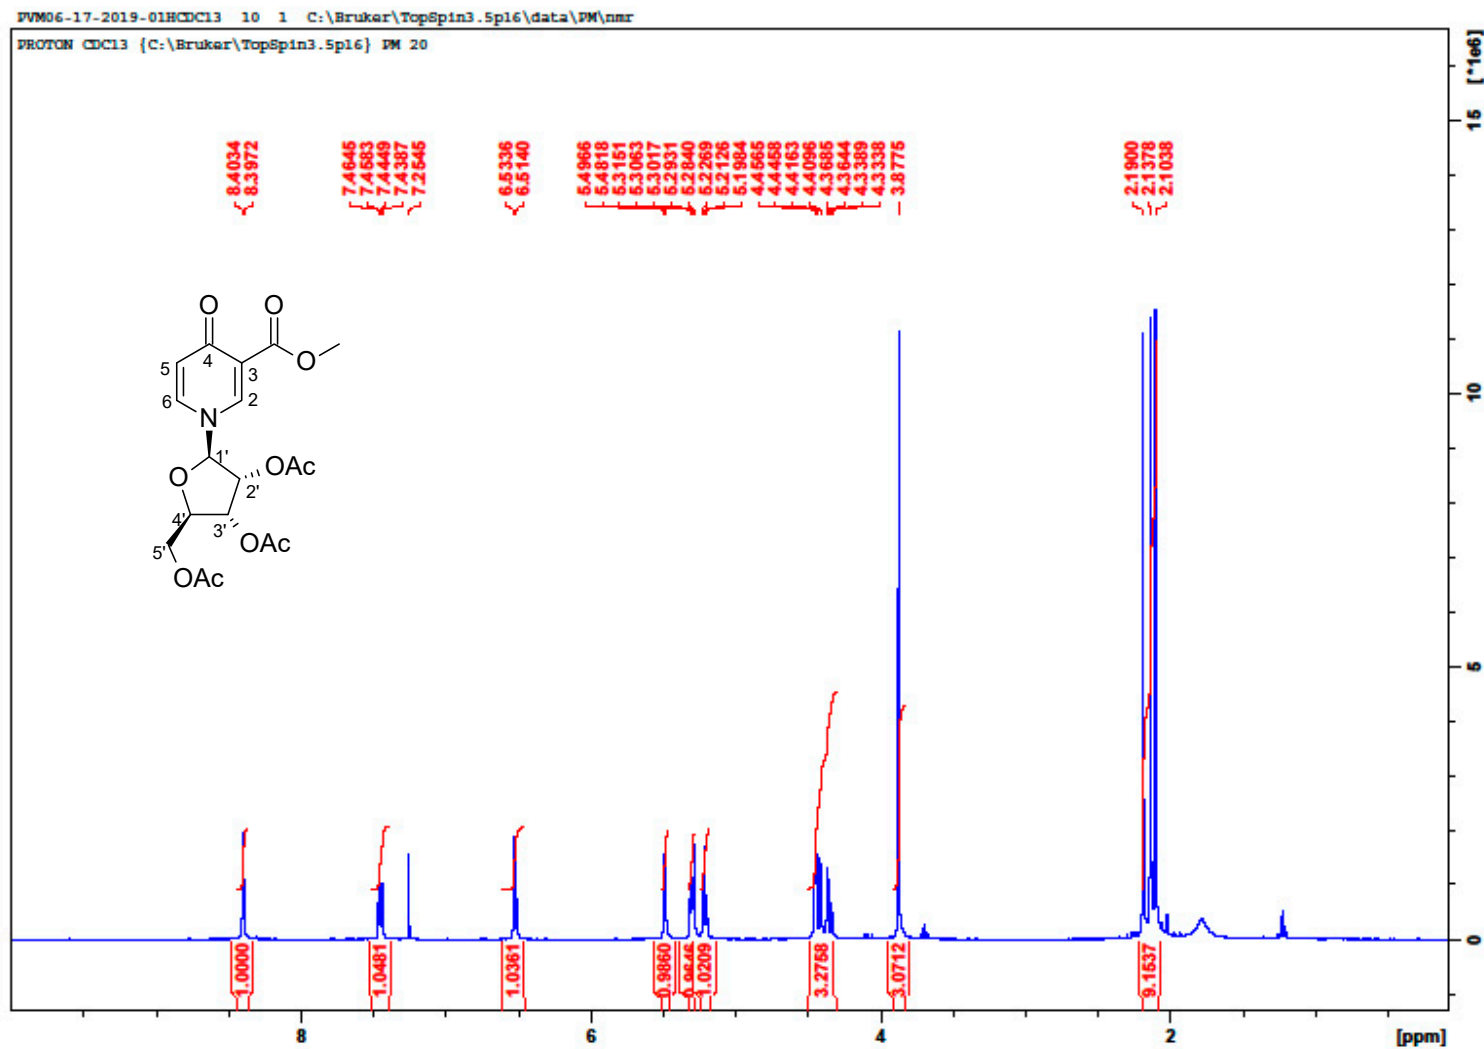

Compound 24. 400 MHz <sup>1</sup>H NMR spectrum in CDCl<sub>3</sub>

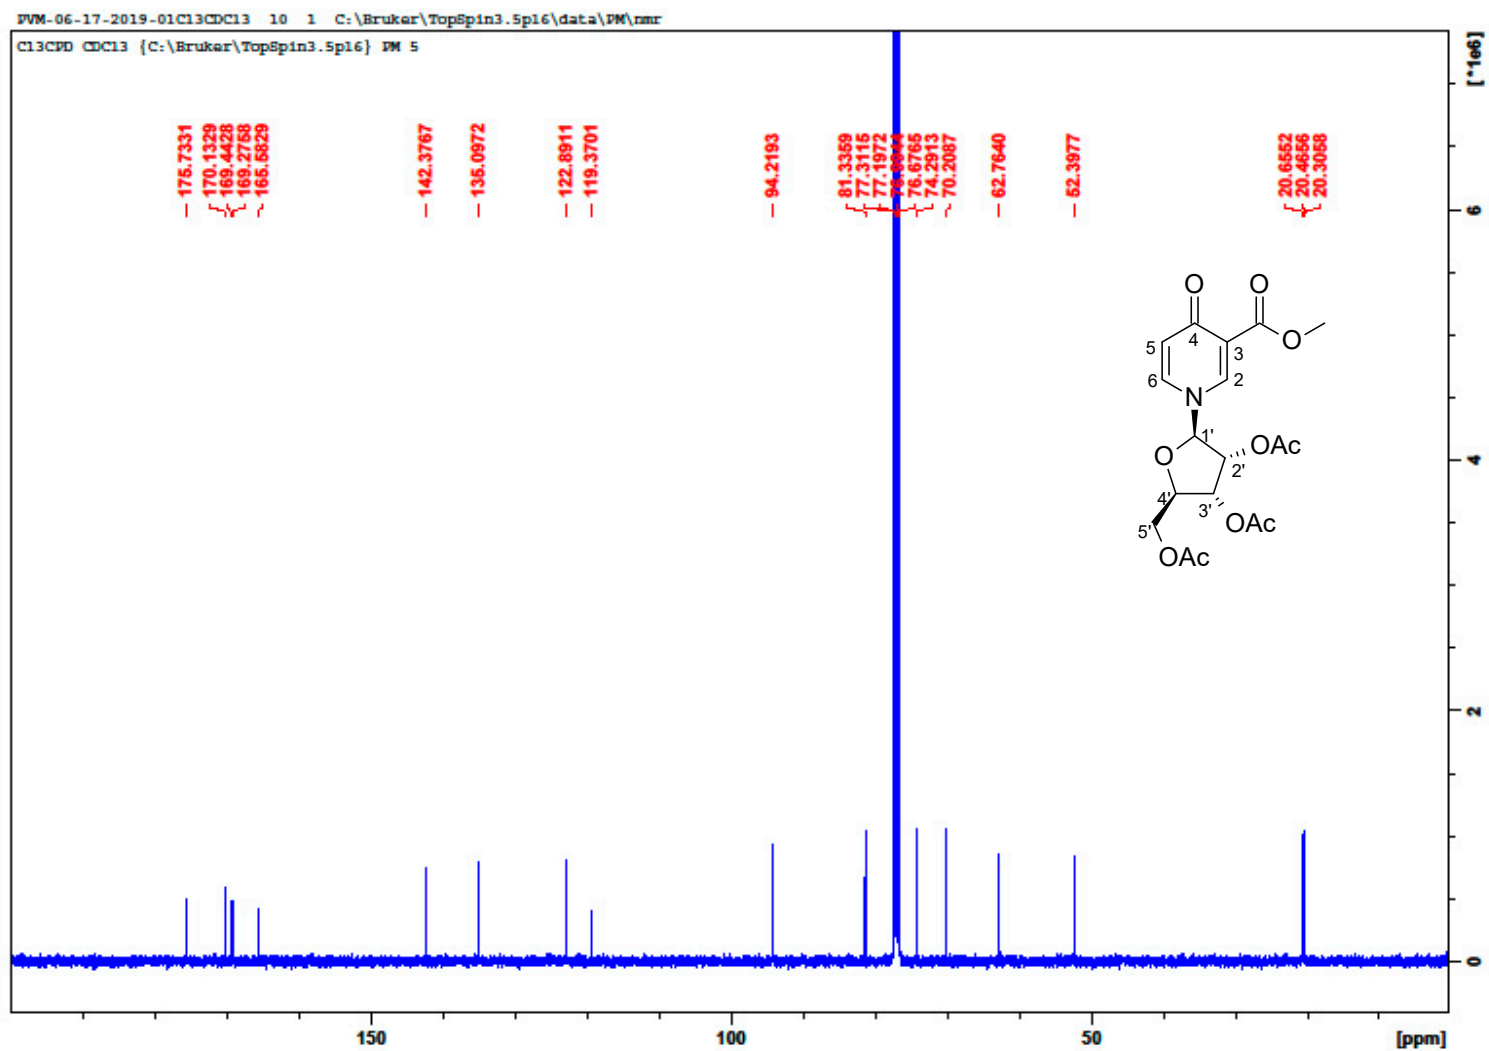

Compound 24. 400 MHz  $^{13}\text{C}$  NMR spectrum in  $\text{CDCl}_3$

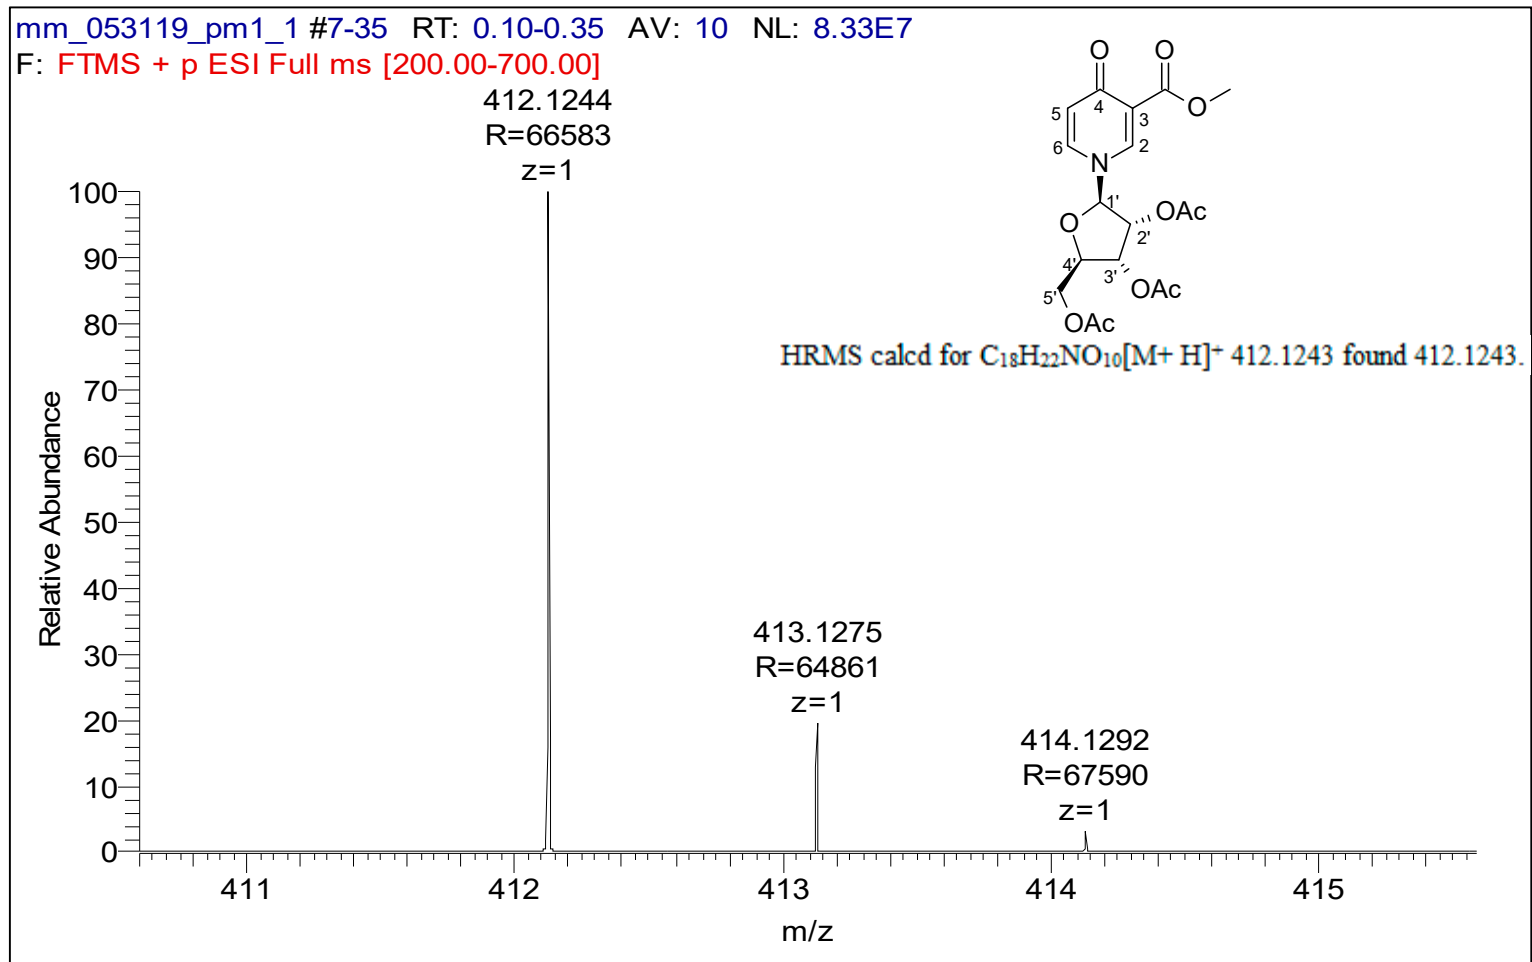

Compound 24. HRMS spectra

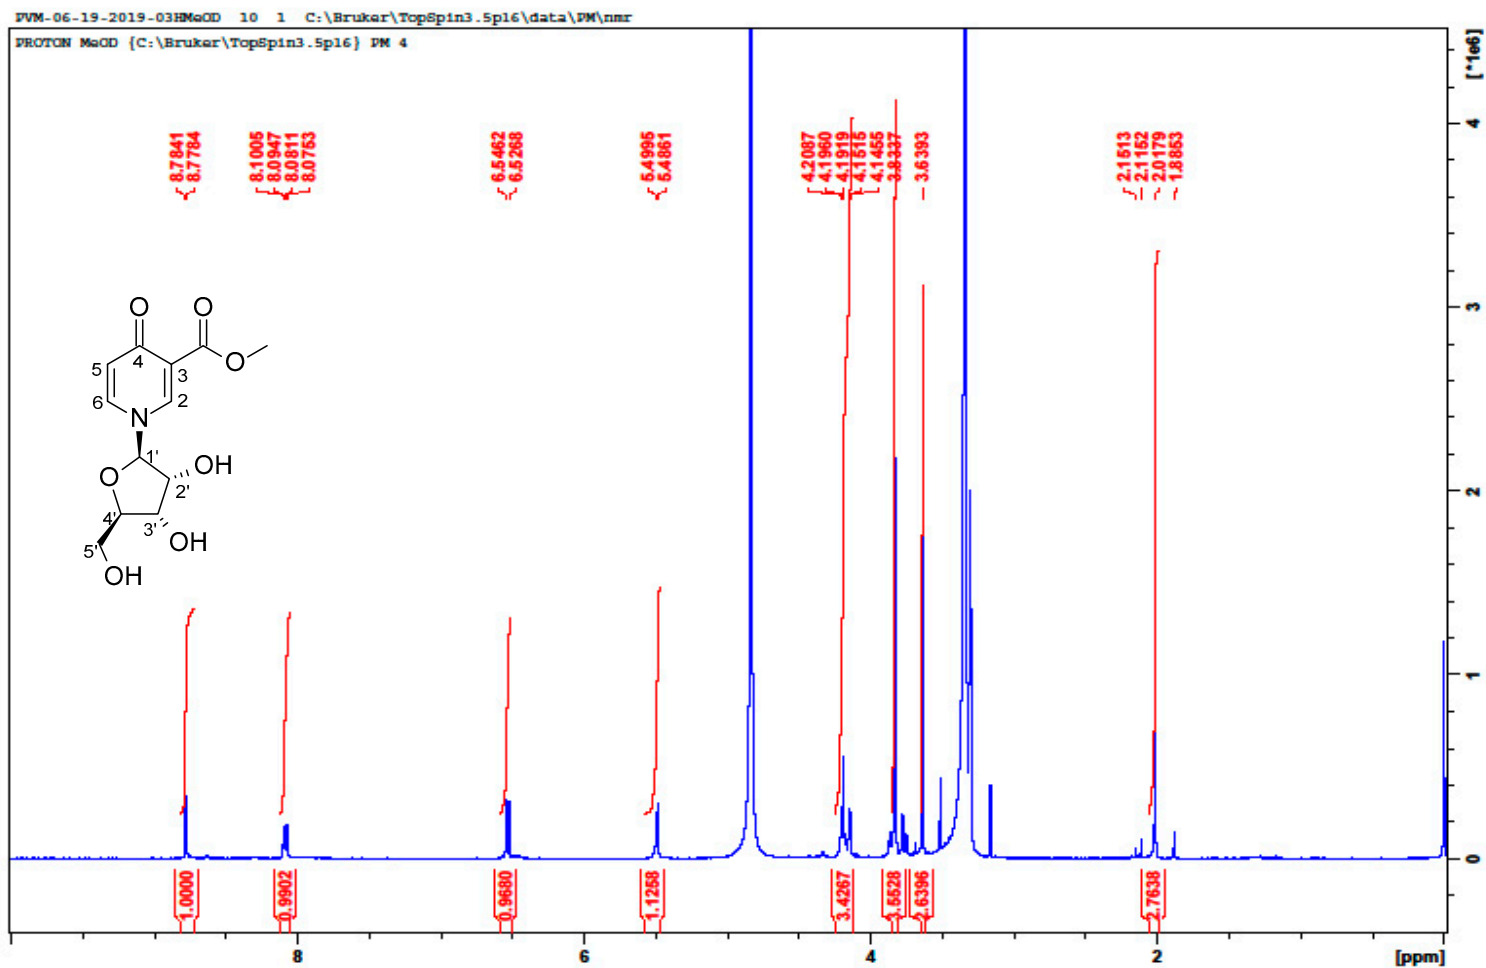

Compound 25. 400 MHz  $^1\text{H}$  NMR spectrum in MeOD

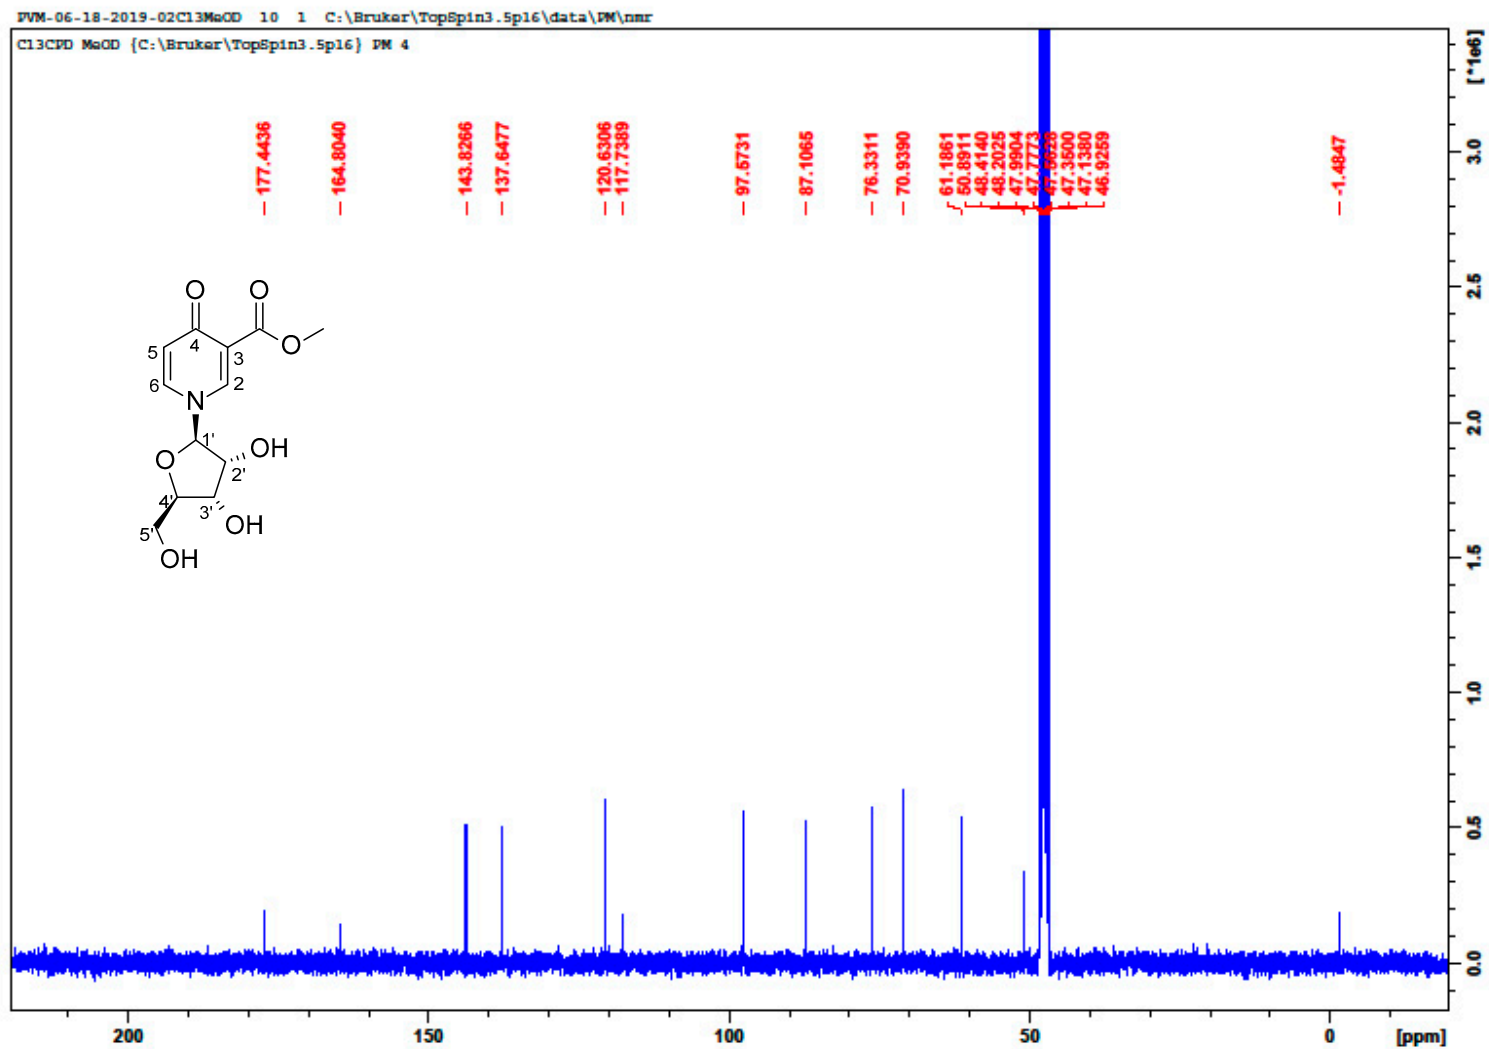

Compound 25. 400 MHz  $^{13}\text{C}$  NMR spectrum in MeOD

mm\_053119\_pm2\_1 #6-28 RT: 0.12-0.33 AV: 7 NL: 4.22E7

F: FTMS + p ESI Full ms [200.00-700.00]

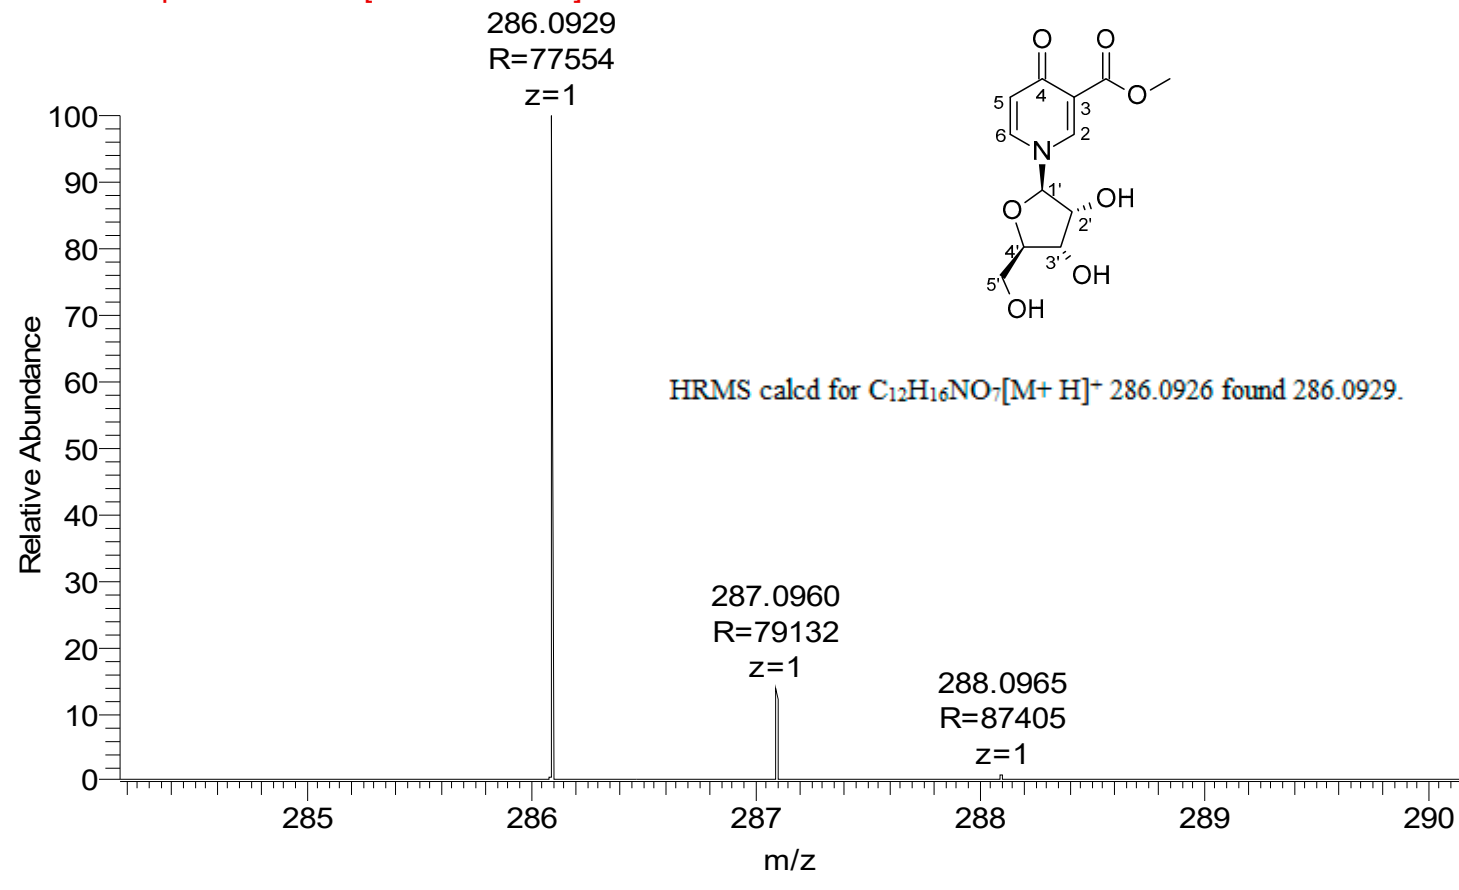

Compound 25. HRMS spectra

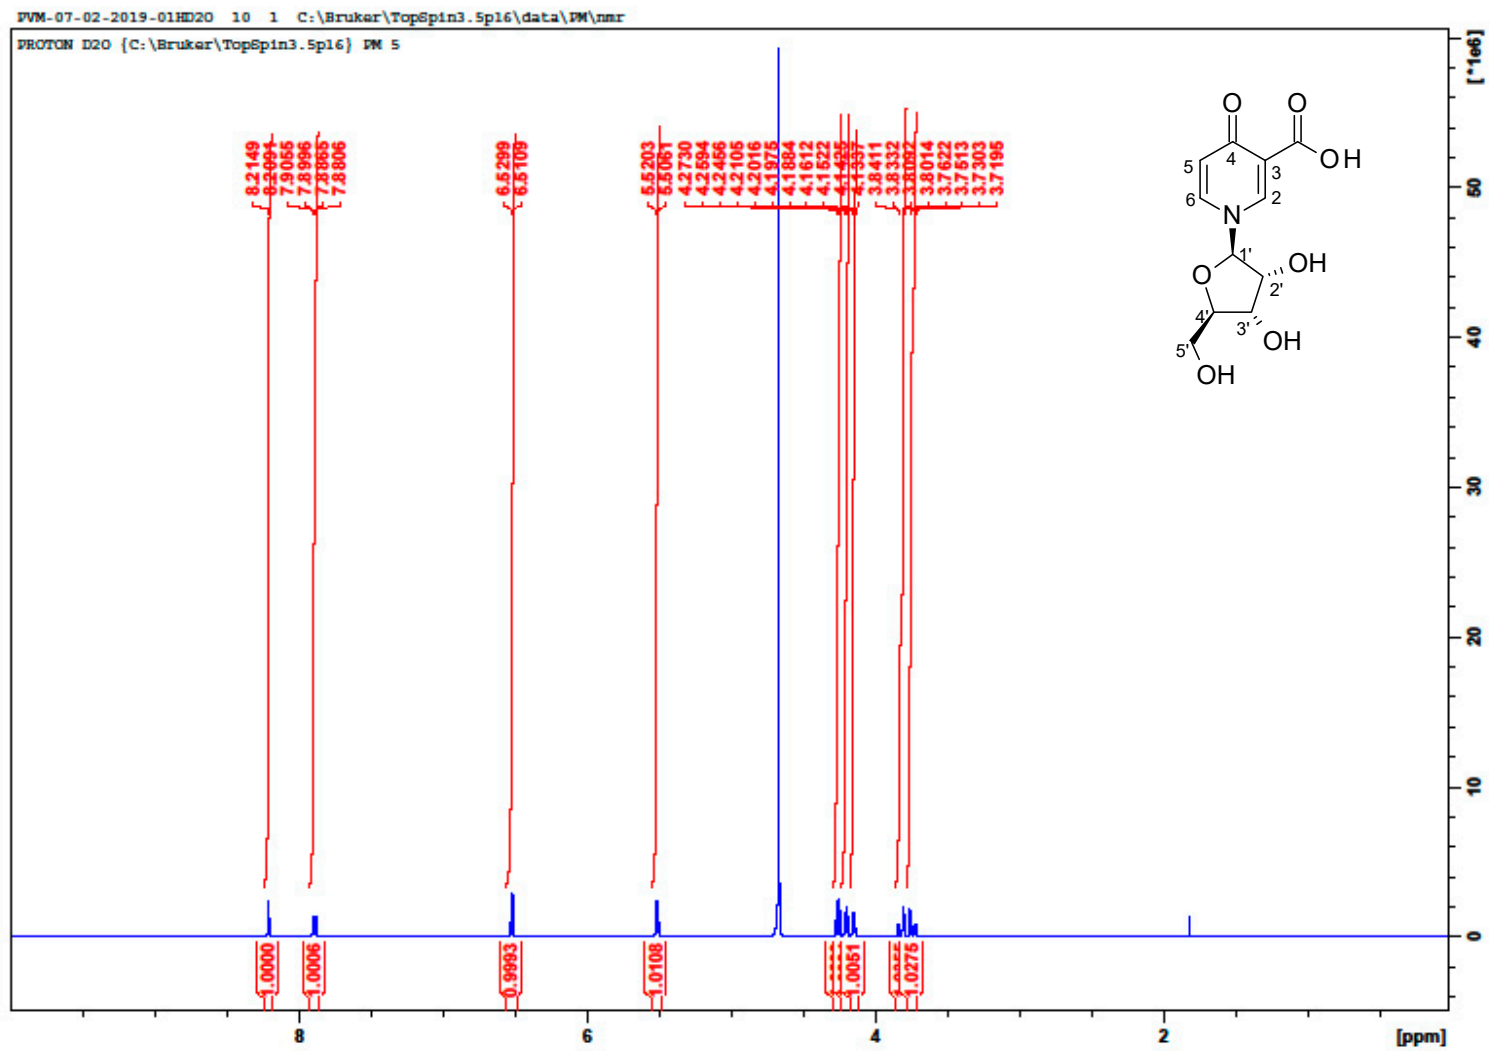

Compound 26. 400 MHz  $^1\text{H}$  NMR spectrum in  $\text{D}_2\text{O}$

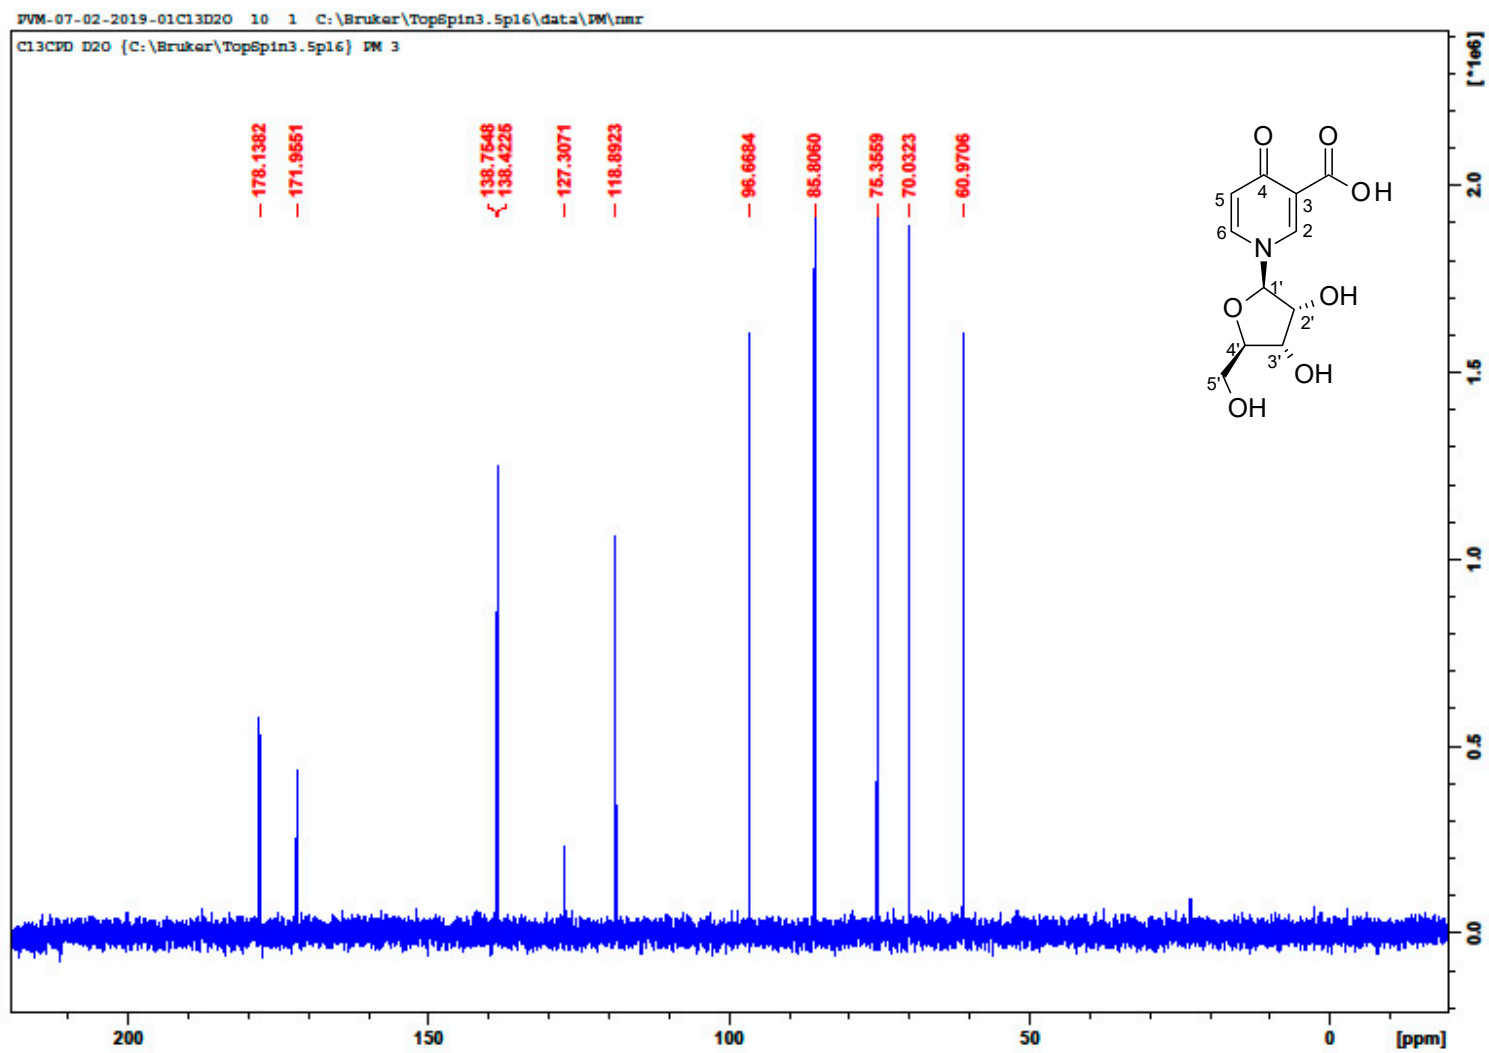

Compound 26. 400 MHz  $^{13}\text{C}$  NMR spectrum in  $\text{D}_2\text{O}$



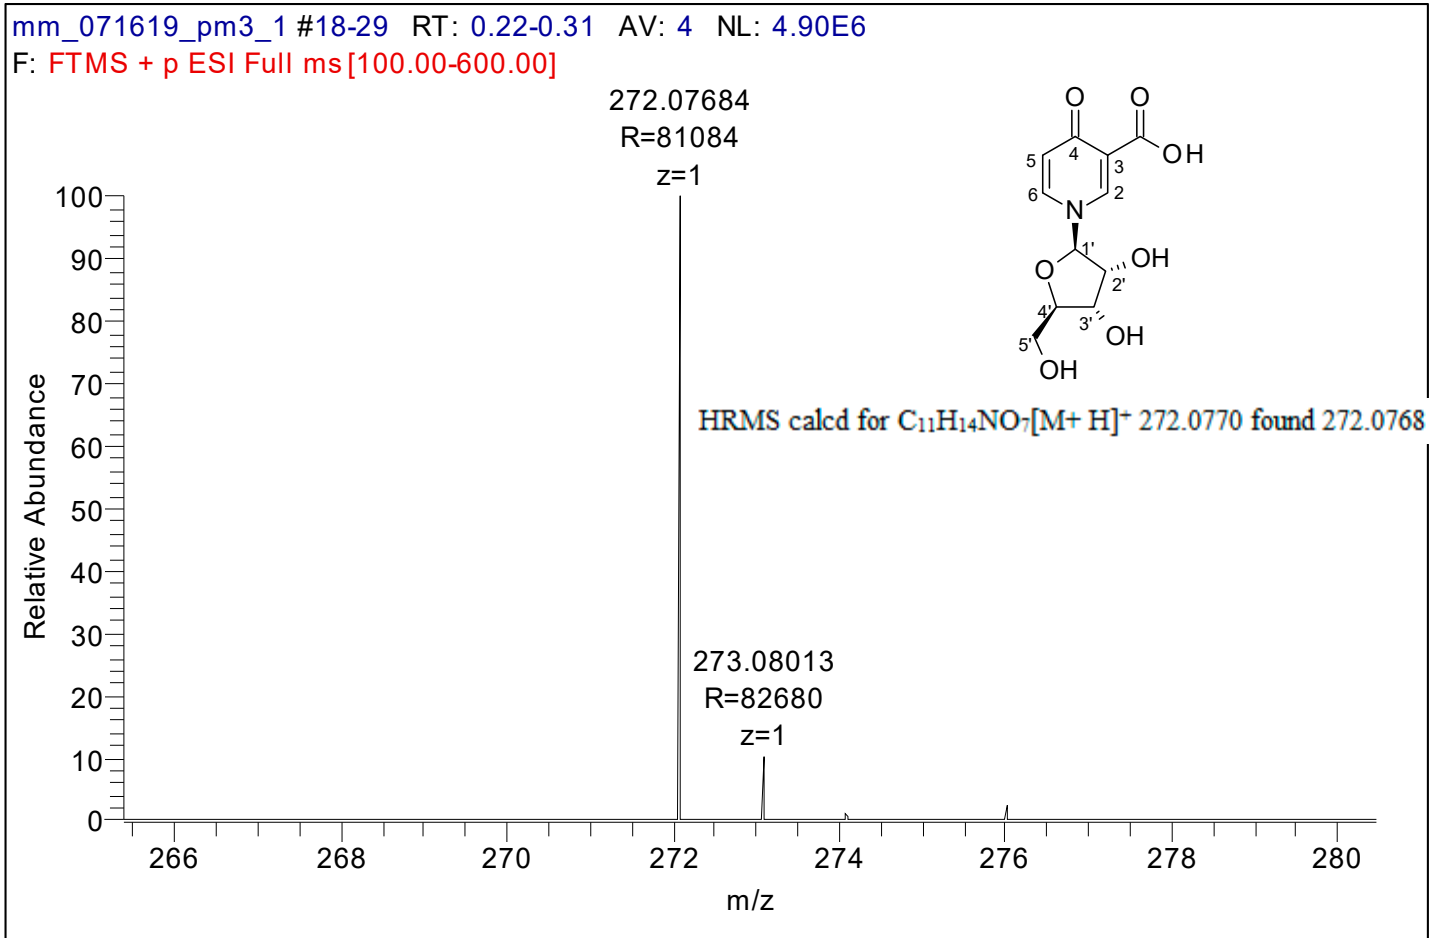

Compound 26. HRMS spectra

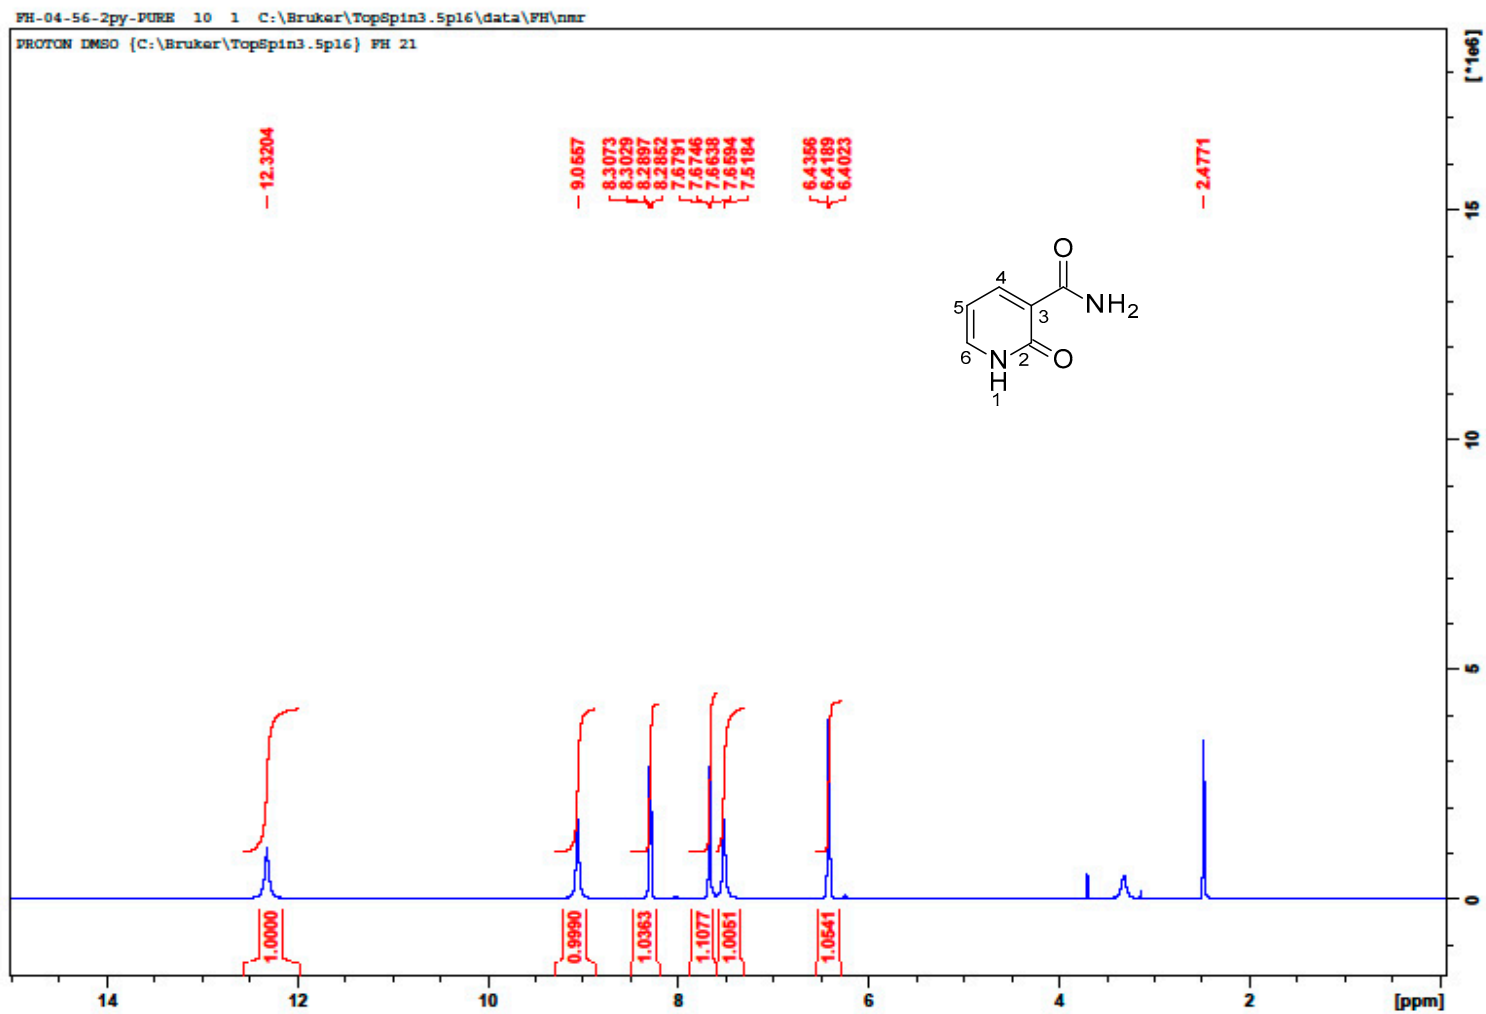

Compound 29. 400 MHz  $^1\text{H}$  NMR spectrum in  $\text{D}_2\text{O}$

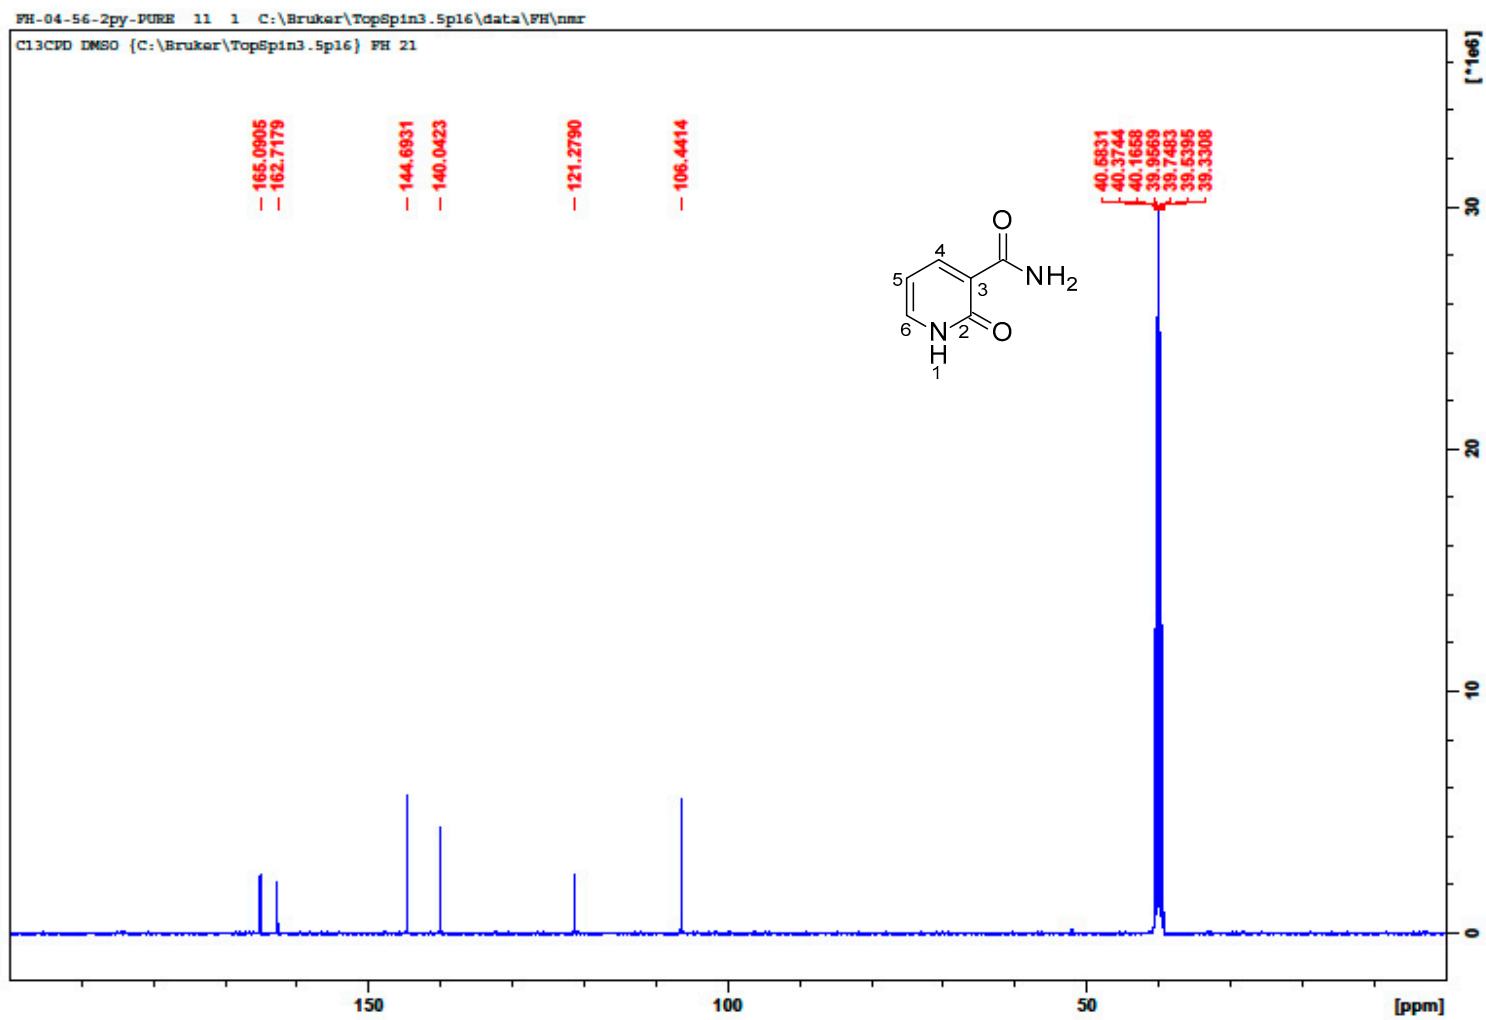

Compound 29. 400 MHz <sup>13</sup>C NMR spectrum in D<sub>2</sub>O

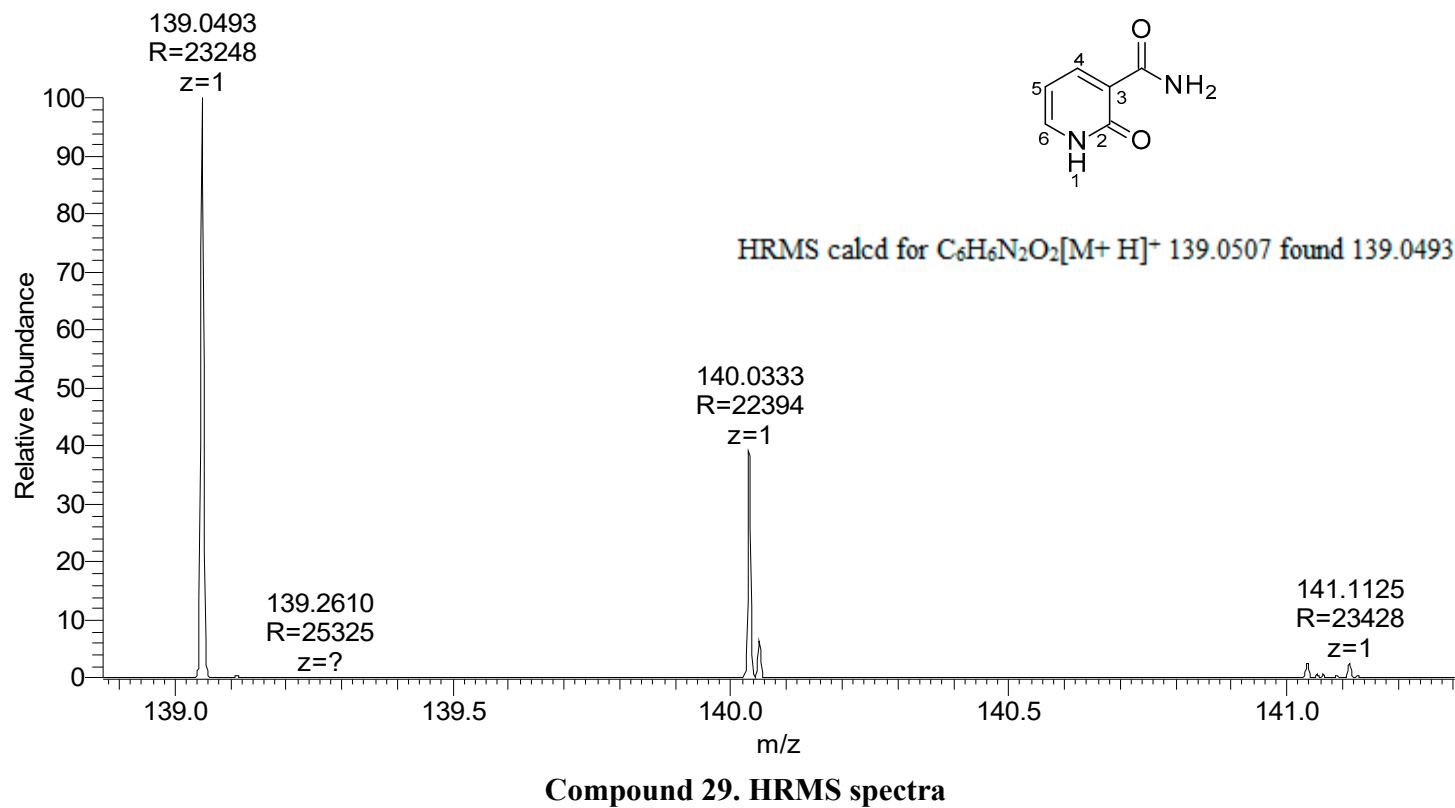

**Figure 2:** NQO2 catalyzed 4PYR formation

4PYR was observed from the reaction of NRH + NQO2, but not NR + NQO2.

| Analyte | Parent Ion m/z | Major Fragment Ion | RT   |
|---------|----------------|--------------------|------|
| NR      | 255.10         | 123.06             | 22.7 |
| NRH     | 257.11         | 167.08             | 10.5 |
| 4PYR    | 271.09         | 139.05             | 10.8 |

**XIC: 4PYR Observed in NRH + NQO2 Fraction 1**

RT: 6.94 - 14.89

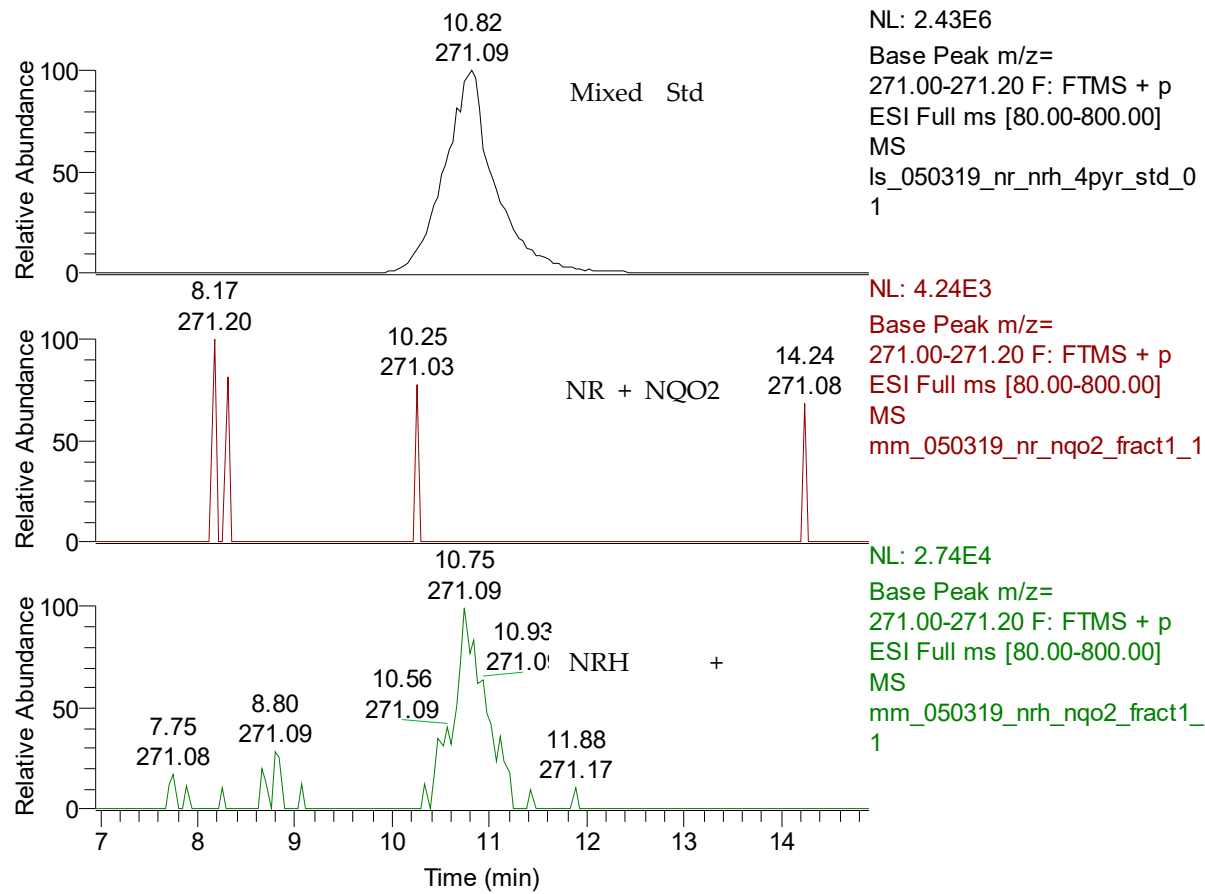

### Targeted MS2 Spectrum of 4PYR

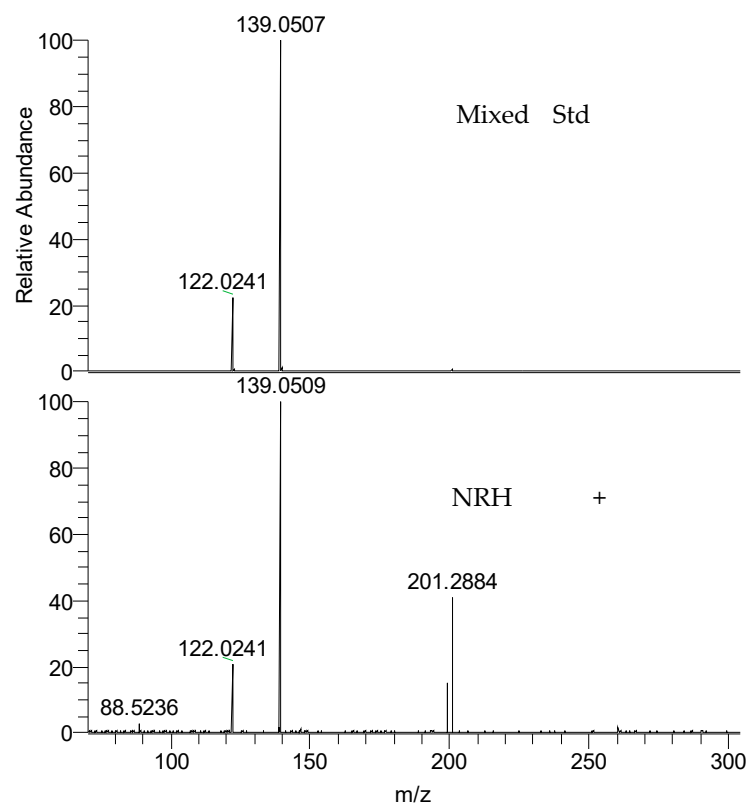

NL: 4.22E5  
ls\_050319\_nr\_nrh\_4pyr\_std\_01  
#899-1031 RT: 10.17-11.51  
AV: 33 F: FTMS + p ESI Full  
ms2 271.10@cid35.00  
[70.00-300.00]

NL: 8.90E3  
mm\_050319\_nrh\_nqo2\_fract1\_1  
#930-975 RT: 10.55-11.00  
AV: 11 F: FTMS + p ESI Full  
ms2 271.10@cid35.00  
[70.00-300.00]

**Figure S3:** Fold change in human urinary NAD catabolites following 1gm administration of acetaminophen/APAP (average n=2, and technical replicates).

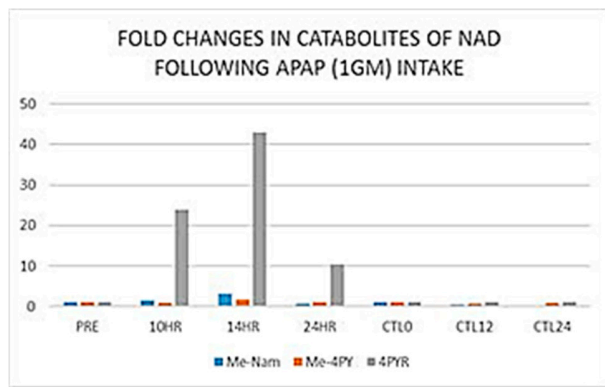

Supplement: ijms-22-01145-s001.pdf [file ijms-22-01145-s001.pdf]
